# Supplementary material for: Automated High-Throughput RNAi Screening in Human Cells Combined with Reporter mRNA Transfection to Identify Novel Regulators of Translation
Source: PubMed Central journal article supplement (PMC3459937; doi:10.1371/journal.pone.0045943), 2012-09-27

# Supplementary Figure 2

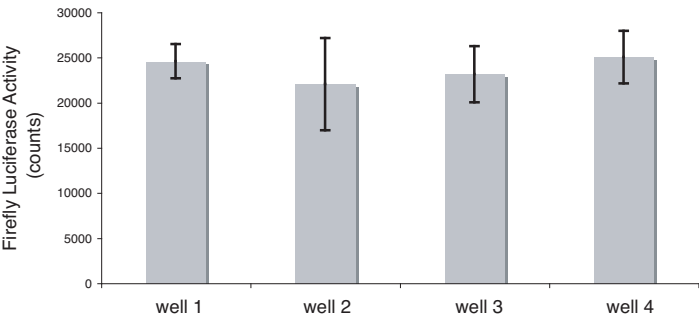

Supplement: pone.0045943.s002.pdf [file pone.0045943.s002.pdf]
