# Supplementary material for: Automated High-Throughput RNAi Screening in Human Cells Combined with Reporter mRNA Transfection to Identify Novel Regulators of Translation
Source: PubMed Central journal article supplement (PMC3459937; doi:10.1371/journal.pone.0045943), 2012-09-27
Supplement: pone.0045943.s003.pdf [file pone.0045943.s003.pdf]

## Supplementary table 1

| Gene Symbol | RefSeq       | Sense siRNA Sequence 5'-3' | Antisense siRNA Sequence 5'-3' | Normalized luciferase values |
|-------------|--------------|----------------------------|--------------------------------|------------------------------|
| AAK1        | NM_014911    | CGUGAGUAGCGGUGAUGUAtt      | UACAUCACCGCUACUCACGtt          | 102                          |
| AAK1        | NM_014911    | CCUCGGACCUCUCAACAAAtt      | UUUGUUGAGAGGUCCGAGGag          | 251                          |
| AAK1        | NM_014911    | GACAAGCAAUGGGAUGAAAtt      | UUUCAUCCCAUUGCUUGUCct          | 104                          |
| AATK        | NM_001080395 | GGUGAAGAUUGGUGACUAUtt      | AUAGUCACCAAUCUUCACCgt          | 106                          |
| AATK        | NM_001080395 | CGGUUCCGCUGAGAUCAAGAtt     | UCUGAUCUCAGCGGAACCGgg          | 128                          |
| AATK        | NM_001080395 | GCACCUUCAUCGCAACAAUtt      | AUUGUUGCGAUGAAGGUGCag          | 107                          |
| ABL1        | NM_007313    | GAAGGGAGGGUGUACCAUUt       | AAUGGUACACCCUCCCUUcgt          | 181                          |
| ABL1        | NM_007313    | CGACAAGUGGGAGAUGGAAtt      | UUCCAUCUCCCACUUGUCGta          | 1024                         |
| ABL1        | NM_007313    | CACUCUAAGCAUAACUAAAAtt     | UUUAGUUAUGCUUAGAGUGtt          | 133                          |
| ABL2        | NM_007314    | CCCUGUCCUUAUAACUUAAtt      | UAAGUUUAUAAGGACAGGGtt          | 217                          |
| ABL2        | NM_007314    | CAAGCAUCCUAAUCUGGUAtt      | UACCAGAUUAGGAUGCUUGat          | 109                          |
| ABL2        | NM_007314    | CCCUCAAACUCGCAACAAAtt      | UUUGUUGCGAGUUUGAGGGat          | 109                          |
| ACVR1       | NM_001105    | GAGGCAUGAAAAUAUCUUAAtt     | UAAGAUUUUUUCAUGCCUCag          | 322                          |
| ACVR1       | NM_001105    | GGAUCAUUCGUGUACAUCAAtt     | UGAUGUACACGAAUGAUCCaa          | 180                          |
| ACVR1       | NM_001105    | GUUGCUCUCCGAAAAUUUAAtt     | UAAAUUUUCGGAGAGCAActc          | 162                          |
| ACVR1B      | NM_020327    | AGUACUUGAUGAAACCAUUt       | AAUGGUUUUCAUCAAGUACUtc         | 426                          |
| ACVR1B      | NM_020327    | GAACCAUCGUUUUACAAGAtt      | UCUUGUAAAACGAUGGUUCgg          | 285                          |
| ACVR1B      | NM_020327    | GAAGCAGAGAUUACCAGAtt       | UCUGGUUAUAUCUCUGCUUCcc         | 275                          |
| ACVR1C      | NM_145259    | GCCUAAACUGCUCUUCGUUAUtt    | AUACGAAGAGCAGUUAGGCgg          | 146                          |
| ACVR1C      | NM_145259    | CAAUGUUACCAAAAACCGAAAtt    | UUCGGUUUUUGGUAACAUGtt          | 163                          |
| ACVR1C      | NM_145259    | GGCUCUUAUAUGACUAUUt        | AAUAGUCAUAUAAGGAGCCct          | 125                          |
| ACVR2A      | NM_001616    | GCCCAGUUGCUUAACGAAUtt      | AUUCGUUAAGCAACUGGGCtt          | 286                          |
| ACVR2A      | NM_001616    | GGAUGAUUAUCAACUGCUAUtt     | AUAGCAGUUGAUUAUCAUCCag         | 906                          |
| ACVR2A      | NM_001616    | CAGACUUUCUUAAGGCUAAtt      | UUAGCCUUAAGAAAGUCUGat          | 180                          |
| ACVR2B      | NM_001106    | CAUCAUCAUGGAACGAAAtt       | UUCGUUCCAUGUGAUGAUGtt          | 286                          |
| ACVR2B      | NM_001106    | CCAUCGAGCUCGUGAAGAAAtt     | UUCUUCACGAGCUCGAUGGtg          | 126                          |

|        |              |                        |                        |     |
|--------|--------------|------------------------|------------------------|-----|
| ACVR2B | NM_001106    | GCUCCAACCUCGAAGUAGAtt  | UCUACUUCGAGGUUGGAGCct  | 141 |
| ACVRL1 | NM_001077401 | CCGAGUUCGUAACCACUAtt   | UAGUGGUUGACGAACUCGGtg  | 101 |
| ACVRL1 | NM_001077401 | GGAUCAAGAAGACACUACAtt  | UGUAGUGUCUUCUUGAUCCgc  | 115 |
| ACVRL1 | NM_001077401 | GAUCCGCACGGACUGCUUUt   | AAAGCAGUCCGUGCGGAUCtg  | 308 |
| ADCK2  | NM_052853    | GAAUUCCTCGUGGACUUGAAtt | UUCAAGUCCACGGGAAUUCct  | 98  |
| ADCK2  | NM_052853    | GACCAGUCGUUUCUAGAAAtt  | UUUCUAGAAACGACUGGUCtg  | 105 |
| ADCK2  | NM_052853    | GAUUGACCUUGCGUUACGAAtt | UUCGUAAACGCAGGUCAAUCtg | 129 |
| ADCK4  | NM_024876    | GCUUGUGCCCAGAAUUUCAtt  | UGAAAUUCUGGGCACAAGCcg  | 98  |
| ADCK4  | NM_024876    | UCACAGGCUUUGAAACCAAtt  | UUGGUUUCAAAGCCUGUGAgg  | 241 |
| ADCK4  | NM_024876    | GGACCUGCGGAACCAGAUUt   | AAUCUGGUUCCGCAGGUCCtg  | 304 |
| ADCK5  | NM_174922    | GGCCUUUGCUGAGCAGAUAtt  | UAUCUGCUCAGCAAAGGCct   | 112 |
| ADCK5  | NM_174922    | GUGCAUGACAUAGCAGAAAtt  | UUUCUGCUAUGUCAUGCActg  | 136 |
| ADCK5  | NM_174922    | GCAACGUUCUGGUGCGGAAtt  | UUCCGCACCAGAACGUUGCca  | 170 |
| ADK    | NM_006721    | GCAAGGCUUUGAGACUAAAtt  | UUUAGUCUCAAAAGCCUUGCtc | 67  |
| ADK    | NM_006721    | GCAUUGGGAUAGAUAAAUUt   | AAUUUAUCUAUCCCAAUGCat  | 147 |
| ADK    | NM_006721    | GCCUUAGUUGAUUAUACUUt   | AAGUAUAUCAACAUAAGGCat  | 158 |
| ADRBK1 | NM_001619    | GGAAGAAUGUGGAGCUCAAtt  | UUGAGCUCCACAUUCUUCcac  | 223 |
| ADRBK1 | NM_001619    | GGGAGAUCUUCGACUCAUAtt  | UAUGAGUCGAAGAUCUCCgg   | 136 |
| ADRBK1 | NM_001619    | ACAUCGAAGAGAUUUGUCAtt  | UGACAAAUCUCUUCGAUGUat  | 148 |
| ADRBK2 | NM_005160    | GCAGCAAGAAGUAACGGAAAtt | UUCGGUUACUUCUUGCUGCca  | 121 |
| ADRBK2 | NM_005160    | GCAAGCUGUAGAACACGUAtt  | UACGUGUUCUACAGCUUGCtt  | 136 |
| ADRBK2 | NM_005160    | GCUACUUGAUUGCGACCAAtt  | UUGGUCGCAAUCAAGUAGCtt  | 117 |
| AGK    | NM_018238    | GCAUUGAACCUAGACACCAUUt | AUGGUGUCAGGUUCAAUGCag  | 194 |
| AGK    | NM_018238    | CUAUUGUUAAGACAGAUUAtt  | UAAUCUGUCUUAACAAUAGtc  | 134 |
| AGK    | NM_018238    | GCACUUUGCUUAUCCCGGAtt  | UCCGGGAUAAGCAAAGUGCac  | 232 |
| AK1    | NM_000476    | GAAUGAAAUCCGAACAGUUt   | AACUGUUCGGAUUCAUUCgg   | 199 |
| AK1    | NM_000476    | CAUUUCCAUUGGUUAUUUAtt  | UAAAUAACCAAUGGAAAUGaa  | 275 |
| AK1    | NM_000476    | GGUGCUCACGUGUCCUUAAtt  | UUAAGGACACGUGAGCACc aa | 142 |
| AK2    | NM_013411    | GCUUGAUUCUGUGAUUGAAtt  | UUCAAUACAGAAUCAAGCtt   | 112 |
| AK2    | NM_013411    | GACUCUCUGCUGAUCCGAAtt  | UUCGGAUCAGCAGAGAGUCtg  | 159 |
| AK2    | NM_013411    | GUCGAUCAGAUGAUAAUGAtt  | UCAUUUAUCAUCUGAUCGACgg | 59  |

|        |              |                        |                         |     |
|--------|--------------|------------------------|-------------------------|-----|
| AK3    | NM_016282    | GGCUUAUGAAGACCAAACAtt  | UGUUUGGUCUUCAUAAGCCtt   | 159 |
| AK3    | NM_016282    | GCGUGAGGAUGAUAAACCAAtt | UGGUUUUAUCAUCCUCACGctg  | 125 |
| AK3    | NM_016282    | GGCCCUAUGUAUAUGCUIUtt  | AAAGCAUAUACAUAAGGGCCaa  | 429 |
| AK3L1  | NM_001005353 | GUUGUAAGAUCAUAUCUIUAtt | UAAGAUUAUGAUCUUAACAACat | 402 |
| AK3L1  | NM_001005353 | GAACUGAUAGGAAAACAAAAtt | UUUGUUUUCCUAUCAGUUCac   | 89  |
| AK3L1  | NM_001005353 | CAUCUUUUCUAGUUGAAAUtt  | AUUUCAACUAGAAAAGAUGct   | 198 |
| AK3L2  | NM_001002921 | GUCAUUGAAUUAUACAAGAtt  | UCUUGUAUAAUCAAUGACtg    | 139 |
| AK3L2  | NM_001002921 | GGAACGGAGACGAACAAAAtt  | UUUUGUUCGUCUCCGUUCcgg   | 112 |
| AK3L2  | NM_001002921 | GGAGGAUGAUAAACCCGAAtt  | UUCGGGUUUUAUCAUCCUCctg  | 308 |
| AK5    | NM_174858    | GGAGACUAAUGAACUUCAAtt  | UUGAAGUUCAUUAGUCUCctt   | 114 |
| AK5    | NM_174858    | GGCUUGUGCUAAUCAGAGAtt  | UCUCUGAUUAGCACAAGCCag   | 193 |
| AK5    | NM_174858    | CGAUUUGGAUUCCAAUACAtt  | UGUAUUGGAAUCCAUAUCGtt   | 383 |
| AK7    | NM_152327    | GGACAUCAAUUUCGACGAUtt  | AUCGUCGAUAUUGAUGUCcgc   | 103 |
| AK7    | NM_152327    | GAAUAGACUUGCUAUCAAAAtt | UUUGAUAGCAAGUCUAUUCtg   | 91  |
| AK7    | NM_152327    | GGAUGCUIUCGGAUGAGUIUtt | AAACUCAUCCGAAGCAUCcag   | 76  |
| AKAP12 | NM_005100    | CCAGGCUAAUGAUUUUGGAtt  | UCCAAUAUCAUUAGCCUGGga   | 114 |
| AKAP12 | NM_005100    | CCAUGACUGUUGAGGUAGAtt  | UCUACCUCAACAGUCAUGGtc   | 154 |
| AKAP12 | NM_005100    | CGAAACAGCUGUUACCGUAtt  | UACGGUAACAGCUGUUUCGtg   | 440 |
| AKAP14 | NM_001008534 | GGAUGAAUUGACUCAAGUAtt  | UACUUGAGUCAAUUCAUCctc   | 139 |
| AKAP14 | NM_001008534 | ACAUCAAGUGGAUGACUCAtt  | UGAGUCAUCCACUUGAUGUtt   | 98  |
| AKAP14 | NM_001008534 | CUGUUAAGAUUGUGGAAGAtt  | UCUUCCACAAUCUUAACAGca   | 148 |
| AKAP7  | NM_016377    | CGAAGCAGCUGAUCAGAAUtt  | AUUCUGAUCAGCUGCUUCGgt   | 119 |
| AKAP7  | NM_016377    | AACUAGUAAGGCUCAGUAAtt  | UUACUGAGCCUACUAGUuca    | 208 |
| AKAP7  | NM_016377    | GCUGAACUAGUAAGGCUCAtt  | UGAGCCUUAUAGUUCAGCgt    | 426 |
| AKAP8  | NM_005858    | CGGAAGCAGUUCCAACUIUtt  | AAAGUUGGAACUGCUUCCGtt   | 72  |
| AKAP8  | NM_005858    | CCGUAGCUUUGAUGACGAAtt  | UUCGUCAUCAAGCUACGGaa    | 99  |
| AKAP8  | NM_005858    | GCAGUACAGUGAAUGCCGAtt  | UCGGCAUUCACUGUACUGccc   | 151 |
| AKAP8L | NM_014371    | GGAACACUUAAGUACGUAtt   | UACGUACUUAAGUGUIUCctt   | 78  |
| AKAP8L | NM_014371    | CCAUGGAUCACAACCGGAAtt  | UUCCGGUUGUGAUCCAUGGtc   | 191 |
| AKAP8L | NM_014371    | CAGUCGACAUACUCGGAUAtt  | UAUCCGAGUAUGUCGACUGca   | 373 |
| AKT1   | NM_001014431 | GCGUGACCAUGAACGAGUIUtt | AACUCGUUCAUGGUCACGcgg   | 72  |

|          |              |                        |                        |     |
|----------|--------------|------------------------|------------------------|-----|
| AKT1     | NM_001014431 | GAACAAUCCGAUUCACGUAtt  | UACGUGAAUCGGAUUGUUCtg  | 287 |
| AKT1     | NM_001014431 | CGGUAGCACUUGACCUUUUtt  | AAAAGGUCAAGUGCUACCGtg  | 84  |
| AKT2     | NM_001626    | CAACUUCUCCGUAGCAGAAtt  | UUCUGCUACGGAGAAGUUGtt  | 108 |
| AKT2     | NM_001626    | CGGGCUAAAGUGACCAUGAtt  | UCAUGGUCACUUUAGCCCGtg  | 343 |
| AKT2     | NM_001626    | UGACUUCGACUAUCUCAAAtt  | UUUGAGAUAGUCGAAGUCAtt  | 98  |
| AKT3     | NM_181690    | GUAACAUCUGAGACAGAUAtt  | UAUCUGUCUCAGAUUUACtt   | 50  |
| AKT3     | NM_181690    | GGACUAUCUACAUUCGGAtt   | UCCGGAAUGUAGAUAGUCCaa  | 102 |
| AKT3     | NM_181690    | GCUCAUUCAUAGGAUUAAtt   | UUUAUCCUAUGAAUGAGCca   | 220 |
| ALDH18A1 | NM_002860    | GCGUGAUGAGAUCUGUUAtt   | UACAGGAUCUCAUCACGctg   | 239 |
| ALDH18A1 | NM_002860    | GGAAUUAUGCAUUGAAGUAtt  | UACUUCAAUGCAUAAUUCcag  | 111 |
| ALDH18A1 | NM_002860    | CGGAUGUCAUCGUCACAGAtt  | UCUGUGACGAUGACAUCCGtg  | 64  |
| ALK      | NM_004304    | CAUGCUCUAUUGCUCAGUAtt  | UACUGAGCAAUAGAGCAUGgt  | 108 |
| ALK      | NM_004304    | CUGUUUGAGAGAAACCCAAtt  | UUGGGUUUCUCUCAAACAGgt  | 119 |
| ALK      | NM_004304    | CAAACCAGUUAUCCAGAAtt   | UUCUGGAUUAACUGGUUUGta  | 128 |
| ALPK1    | NM_025144    | GGAAGUGAAUUAUCACGUUtt  | AACGUGAUAAUUCACUUCctc  | 127 |
| ALPK1    | NM_025144    | GAGAUGUUGUGGUCGAUUUtt  | AAAUCGACCACAACAUCUCta  | 150 |
| ALPK1    | NM_025144    | CCAUGAGCAAGAACGAUUAtt  | UAAUCGUUCUUGCUCAUGGaa  | 128 |
| ALPK2    | NM_052947    | CAUCGGCCUGAGAACAUAAtt  | UAUUGUUCUCAGGCCGAUGga  | 77  |
| ALPK2    | NM_052947    | CCAUGACCUUCAUUGAUCAtt  | UGAUCAAUGAAGGUCAUGGaa  | 72  |
| ALPK2    | NM_052947    | GGGCUGUACCUGAUAGUCUtt  | AGACUAUCAGGUACAGCCcag  | 71  |
| ALPK3    | NM_020778    | GACUAGGCCUUUCAACAGAtt  | UCUGUUGAAAGGCCUAGUCgg  | 138 |
| ALPK3    | NM_020778    | GGUACAAGGAUGAUACGGAtt  | UCCGUAUCAUCCUUGUACCag  | 261 |
| ALPK3    | NM_020778    | CCAUGGAUAUGGAAACCCAAtt | UGGGUUUCCAUAUCCAUGGgt  | 114 |
| ALS2CR2  | NM_018571    | GCUUUACAGAAAGCCGUGAtt  | UCACGGCUUUCUGUAAAGCtt  | 263 |
| ALS2CR2  | NM_018571    | CCUCAAUACAGAAUCCAGAAtt | UUCUGGAUUCUGAUUGAGGga  | 216 |
| ALS2CR2  | NM_018571    | GCCCAUUGGAUAUCAGUAUtt  | AUACUGAUAUCCA AUGGGCta | 279 |
| ALS2CR7  | NM_139158    | GAGUCCCAUUUACAGCUAUtt  | AUAGCUGUAAAUGGGACUCct  | 183 |
| ALS2CR7  | NM_139158    | GCUCUUAUGCGACAGUUUAtt  | UAAACUGUCGCAUAAGAGCct  | 283 |
| ALS2CR7  | NM_139158    | CCUGAAACCUCAGAACUUAtt  | UAAGUUCUGAGGUUUCAGGtc  | 45  |
| AMHR2    | NM_020547    | CGACCACAUUGUCCGAUUUtt  | AAAUCGGACAAUGUGGUCGtg  | 214 |
| AMHR2    | NM_020547    | GAAUGUGCUCAUUCGGGAAtt  | UUCCCGAAUGAGCACAUUctg  | 294 |

|          |           |                        |                        |      |
|----------|-----------|------------------------|------------------------|------|
| AMHR2    | NM_020547 | CUGGGAGAGCUGCUAGAUAtt  | UAUCUAGCAGCUCUCCCAGtg  | 70   |
| ANKK1    | NM_178510 | AGCACAUCGUGUCUAUCUAtt  | UAGAUAGACACGAUGUGCUga  | 160  |
| ANKK1    | NM_178510 | GCAAAUACCUGAUCUGCAAtt  | UUGCAGAU CAGGUUUUGCcc  | 124  |
| ANKK1    | NM_178510 | GGUUCGCAUCAUCCAUGAtt   | UCAUGGAUGAUGCGGAACctg  | 145  |
| ARAF     | NM_001654 | CGAGAUCUCAAGUCUAACAtt  | UGUUAGACUUGAGAUCUCGgt  | 1122 |
| ARAF     | NM_001654 | GUGUUGACAUGAGUACCAAtt  | UUGGUACUCAUGUCAACACag  | 149  |
| ARAF     | NM_001654 | UGCACAUUUUUGUACGGAAtt  | UUCCGUACAAAAUUGUGCAtg  | 159  |
| ASB10    | NM_080871 | CAACAUCGUGCUCUGAGAtt   | UCUCAGAGCACGGAUGUUGaa  | 92   |
| ASB10    | NM_080871 | GGUUUGGAGCGAGAGUGGAtt  | UCCACUCUCGCUCCAAACctg  | 67   |
| ASB10    | NM_080871 | CAACAUCGCUGACCAGGAUtt  | AUCCUGGUCAGCGAUGUUGgg  | 104  |
| ASCIZ    | NM_015251 | CGGACUUCUUACUCGCAGAtt  | UCUGCGAGUAAGAAGUCCGtt  | 95   |
| ASCIZ    | NM_015251 | GAAUCGAUUUUUGAUUACGAtt | UCGAUAU CAAAAUCGAUUCcg | 165  |
| ASCIZ    | NM_015251 | GGAUAGAAAGUCCAACGGAtt  | UCCGUUGGACUUUCUAUCCca  | 344  |
| ATM      | NM_138292 | AUAUAUCACCUGUUUGUUAtt  | UAACAAACAGGUGAUUAUAtt  | 239  |
| ATM      | NM_138292 | GCAAUUGUCAUAAAACCAAtt  | UUGGUUUUAUGACAAUUGCtg  | 294  |
| ATM      | NM_138292 | GCUGUUACCUGUUUGAAAAtt  | UUUUCAAACAGGU AACAGCtg | 149  |
| ATR      | NM_001184 | GAGCCGAUUUUUAAGUCAAtt  | UUGACUUAAAAUCGGCUCat   | 182  |
| ATR      | NM_001184 | GAUGAGUAUGCAAAAUUUAtt  | UAAUUUUUGCAUACUCAUCaa  | 218  |
| ATR      | NM_001184 | UUGUAGAAAUGGAUACUGAtt  | UCAGUAUCCAUUUCUACAagg  | 145  |
| AURKA    | NM_003600 | GCGCAUUCUUUGCAAGCAtt   | UGCUGCAAAGGAAUGCGCtg   | 155  |
| AURKA    | NM_003600 | GAGUCUACCUAAUUCUGGAtt  | UCCAGAAUUAGGUAGACUCtg  | 167  |
| AURKA    | NM_003600 | GGAUCAGCUGGAGAGCUUAtt  | UAAGCUCUCCAGCUGAUCCaa  | 57   |
| AURKAIP1 | NM_017900 | GCAGAUCAAGUUCGAGAAAtt  | UUUCUCGAACUUGAUCUGCtt  | 191  |
| AURKAIP1 | NM_017900 | CCACCGCAAUCCUACCAGUtt  | ACUGGUAGGAUUGCGGUGGag  | 82   |
| AURKAIP1 | NM_017900 | AGAUCAAGUUCGAGAAAGAtt  | UCUUUCUCGAACUUGAUCUgc  | 37   |
| AURKB    | NM_004217 | CCUGCGUCUCUACAACUAtt   | AUAGUUGUAGAGACGCAGGat  | 78   |
| AURKB    | NM_004217 | UCGUCAAGGUGGACCUAAAAtt | UUUAGGUCCACCUUGACGAtg  | 201  |
| AURKB    | NM_004217 | GCAAGUUUGGAAACGUGUAtt  | UACACGUUUCCAACUUGCct   | 460  |
| AURKC    | NM_003160 | CCUGCGCCUGUAUAACUAtt   | AUAGUUUAUCAGGCGCAGGat  | 105  |
| AURKC    | NM_003160 | GGGUGUACCUGAUUCUGGAtt  | UCCAGAAUCAGGUACACCCgg  | 105  |
| AURKC    | NM_003160 | GUGAUUCACAGAGAUUAUAtt  | UAAUAUCUCUGUGAAUACtt   | 285  |

|        |           |                        |                        |     |
|--------|-----------|------------------------|------------------------|-----|
| AXL    | NM_021913 | GGAACUGCAUGCUGAAUGAtt  | UCAUUCAGCAUGCAGUUCctg  | 166 |
| AXL    | NM_021913 | GGUGGAGGUUAUCCUGAAtt   | UUCAGGAUAACCUCCACCctc  | 304 |
| AXL    | NM_021913 | CAGCGAGAUUUUAUGACUAUtt | AUAGUCAUAAAUCUCGCUGtt  | 151 |
| BCKDK  | NM_005881 | ACAAUGAUGUCGAUCUGAUtt  | AUCAGAUCGACAUCAUUGUtg  | 60  |
| BCKDK  | NM_005881 | AGACCGUCACCUCCUUUUAtt  | UAAAAGGAGGUGACGGUCUtg  | 114 |
| BCKDK  | NM_005881 | CGCUACUUCUUGGACAAGAtt  | UCUUGUCCAAGAAGUAGCGga  | 202 |
| BLK    | NM_001715 | GCUCCUUUCUUAUCAGAGAtt  | UCUCUGAUAAAGAAAGGAGCcg | 149 |
| BLK    | NM_001715 | UCUACGCAGUGGUCACCAAtt  | UUGGUGACCACUGCGUAGAg   | 197 |
| BLK    | NM_001715 | UGAUGGAAGUUGUCACUAtt   | UAAGUGACAACUCCAUCAgg   | 93  |
| BMP2K  | NM_198892 | GAAUGAUGGUGGGAACUAUtt  | AUAGUUCCCACCAUCAUUCaa  | 153 |
| BMP2K  | NM_198892 | CGAUGUGCAUUGAAGCGAAtt  | UUCGCUUCAAUGCACAUCGga  | 213 |
| BMP2K  | NM_198892 | GCUUGAACCGAUCCGGAAtt   | UUCCGAUCUGGUUCAAGCat   | 141 |
| BMP2KL | XM_936694 | UAAUGAUAAUGAUACCGAAtt  | UUCGGUAUCAUUAUCAUUAaa  | 205 |
| BMP2KL | XM_936694 | GCAUAGAUUAUUUGACUtt    | AAGUCAAAUUAUCAUUGCtt   | 137 |
| BMP2KL | XM_936694 | AACCCAAGAUUAUUAUCAAtt  | UGUAUUAUUAUCUUGGGUUgg  | 209 |
| BMPR1A | NM_004329 | GGCUCGUCGUUGUAUCACAtt  | UGUGAUACAACGACGAGCCat  | 161 |
| BMPR1A | NM_004329 | GGCCGAUAUGGAGAAGUAUtt  | AUACUUCUCCAUAUCGGCCtt  | 285 |
| BMPR1A | NM_004329 | GAAUCUGGAUAGUAUGCUtt   | AAGCAUACUAUCCAGAUUCtg  | 158 |
| BMPR1B | NM_001203 | GGACGAGAGCUUGAACAGAtt  | UCUGUUCAAGCUCUCGUCCaa  | 148 |
| BMPR1B | NM_001203 | GAAGUUGACAUACCACCUAtt  | UAGGUGGUUAUGUCAACUUCat | 127 |
| BMPR1B | NM_001203 | CACUUCAGUCUUAUCAUCAAtt | UGAUGUAAGACUGGAAGUGat  | 101 |
| BMPR2  | NM_001204 | GAACGGCUAUGUGCGUUUAtt  | UAAACGCACAUAGCCGUUCtt  | 145 |
| BMPR2  | NM_001204 | CCGAAAUUCAAUUAACUAUtt  | AUAGUUAUUUGAAUUUCGgtt  | 261 |
| BMPR2  | NM_001204 | GGACAAUUAUUAUGCUGAAtt  | UUCGAGCAUAAUUAUUGCCca  | 245 |
| BMX    | NM_001721 | GUACCACUCUAGCCCAAUAtt  | UAUUGGGCUAGAGUGGUACtt  | 150 |
| BMX    | NM_001721 | GUACCAGUCUAGCGCAAUAtt  | UAUUGCGCUAGACUGGUACtt  | 59  |
| BMX    | NM_001721 | CAGACUAUGAUGAAACUCAAtt | UGAGUUUCAUCAUAGUCUGgg  | 101 |
| BRAF   | NM_004333 | CAGAGGAUUUUAGUCUAUAtt  | UAUAGACUAAAUCCUCUGtt   | 164 |
| BRAF   | NM_004333 | GCAUAAUCCACCAUCAAUAtt  | UAUUGAUGGUGGAUUAUGCtc  | 77  |
| BRAF   | NM_004333 | CAGUUGUCUGGAUCCAUUtt   | AAAUGGAUCCAGACAACUGtt  | 210 |
| BRDG1  | NM_012108 | GGCAAGUAAUUAACUGCAAtt  | UGCAGUUUAUUACUUGCCca   | 167 |

|          |           |                        |                        |     |
|----------|-----------|------------------------|------------------------|-----|
| BRDG1    | NM_012108 | GCCUGGUAGUGACAGUAGAtt  | UCUACUGUCACUACCAGGCct  | 289 |
| BRDG1    | NM_012108 | CACCCUUGUUUUGCCGAAAtt  | UUUCGGCAAACAAGGGUGaa   | 275 |
| BRSK1    | NM_032430 | AAAUUUUCCUCGUGCUAAAAtt | UUUAGCACGAGGAAUUAUUUgt | 132 |
| BRSK1    | NM_032430 | AGACAGGGCUGGUUAAACUtt  | AGUUUAACCAGCCCUGUCUgt  | 79  |
| BRSK1    | NM_032430 | GAAACAUCUUGGUACCUAtt   | UAGGUACCAAGGAUGUUUCtg  | 93  |
| BRSK2    | NM_003957 | CGGAAAGAAAGGUACCCGAtt  | UCGGGUACCUUUCUUUCCGgt  | 202 |
| BRSK2    | NM_003957 | GCACUUGUCAGACACCACUtt  | AGUGGUGUCUGACAAGUGCtg  | 203 |
| BRSK2    | NM_003957 | AGAAUGAGCCCGAACCAGAtt  | UCUGGUUCGGGCUCAUUCUtg  | 305 |
| BTK      | NM_000061 | GAAACUGUUUGGUAACGAtt   | UCGUUUACCAAACAGUUUCga  | 158 |
| BTK      | NM_000061 | CACCAGCUCAAAAACGUAAtt  | UUACGUUUUUGAGCUGGUGaa  | 109 |
| BTK      | NM_000061 | CAGUAAGAAGGGUUCAAUAtt  | UAUUGAACCCUUCUUAACUGcc | 0   |
| BUB1     | NM_004336 | GAGUCAAAUAUGGAACGAAtt  | UUCGUUCCAUAUUUGACUCtt  | 251 |
| BUB1     | NM_004336 | GGCCCUACGUAAUAGGCUAtt  | UAGCCUAUUACGUAGGGCCct  | 81  |
| BUB1     | NM_004336 | GGAUUACCACAGCCUAAAAtt  | UUUUAGGCUGUGGUAAUCCat  | 111 |
| BUB1B    | NM_001211 | GGAUUACUGCAUUAACGAtt   | UCGUUUAAUGCAGUAAUCct   | 204 |
| BUB1B    | NM_001211 | CCCUAUGAUUGUAACAAGAtt  | UCUUGUUACAAUCAUAGGgat  | 186 |
| BUB1B    | NM_001211 | GCACACUAGCUGAACUAAAAtt | UUUAGUUCAGCUAGUGUGCtt  | 155 |
| C19orf35 | NM_198532 | CGCUGAUCAAUGUCUCUCUtt  | AGAGAGACAUUGAUCAGCGgg  | 109 |
| C19orf35 | NM_198532 | CUGCCCAAGAAGAUCCUAAtt  | UUAGGAUCUUCUUGGGCAGgg  | 102 |
| C19orf35 | NM_198532 | GCCCACGUUAGCAACCUUtt   | AAGGUUGCUAUACGUGGGCtg  | 156 |
| C1orf57  | NM_032324 | AAAACAACAUUGAUCCAUAtt  | UAUGGAUCAAUUGUUUUUtc   | 110 |
| C1orf57  | NM_032324 | GAUUCGAUGUCGUCACGUUtt  | AACGUGACGACAUCGAAUCct  | 77  |
| C1orf57  | NM_032324 | UGAUGGAUUUUUAUACCGAAtt | UUCGGUAUAAAAUCCAUCAac  | 107 |
| C21orf7  | NM_020152 | CCAUGGAGGUGUCAAACAtt   | UGUUUGAACACCUCAUGGat   | 110 |
| C21orf7  | NM_020152 | GGAUUACAGUAUUUCAGUUtt  | AACUGAAAUAUCGUAAUCc    | 121 |
| C21orf7  | NM_020152 | AGUUAGAUCAGGCAGAAAAtt  | UUUUCUGCCUGAUCUAACUtg  | 64  |
| C9orf95  | NM_017881 | GACUAUCCAUAUGAAGAAtt   | UUCUUCAUAUGGAAUAGUCag  | 54  |
| C9orf95  | NM_017881 | AGAUAGAGACAGAUAAAAAtt  | UUUUUAUCUGUCUCUAUCUca  | 102 |
| C9orf95  | NM_017881 | GACACUAUAUGGAAUAGAAtt  | UUCUAUCCAUAUAGUGUCaa   | 110 |
| C9orf96  | NM_153710 | CGACCAUGGAGCUACAUGAtt  | UCAUGUAGCUCCAUGGUCGtg  | 98  |
| C9orf96  | NM_153710 | AGAAAUCAUUGACUCUGAtt   | UCAGAGUCAAUGAUUUUCUtt  | 75  |

|         |           |                         |                       |     |
|---------|-----------|-------------------------|-----------------------|-----|
| C9orf96 | NM_153710 | GCAUUUUAGAGGUCAUGCAtt   | UGCAUGACCUCUAAAAUGCtg | 226 |
| C9orf98 | NM_152572 | CGGUCCUGAUCGAGAGAAAtt   | UUUCUCUCGAUCAGGACCGtg | 122 |
| C9orf98 | NM_152572 | UGACCUAUGUCCAAAGCAAtt   | UUGCUUUGGACAUAGGUCAga | 71  |
| C9orf98 | NM_152572 | UGGAGAACCUGAUCUAAAAtt   | UUUAAGAUCAGGUUCUCCAgg | 106 |
| CALM1   | NM_006888 | AGGCAUUCGAGUCUUUGAtt    | UCAAGACUCGGAAUGCCUca  | 137 |
| CALM1   | NM_006888 | UGACAAACUUAGGAGAAAAtt   | UUUCUCCUAAGUUUGUCAtg  | 57  |
| CALM1   | NM_006888 | GCCUUCUCCCUAUUUGAUAtt   | UAUCAAAUAGGGAGAAGGCtt | 194 |
| CALM2   | NM_001743 | AAAGGAAUUGGGAACUGUAtt   | UACAGUCCCCAAUUCUUUgt  | 72  |
| CALM2   | NM_001743 | GCACAAUUGACUCCUGAtt     | UCAGGGAAGUCAAUUGUGCca | 122 |
| CALM2   | NM_001743 | CAAAGAAGCUUUUUCACUAtt   | UAGUGAAAAAGCUUCUUUGaa | 122 |
| CALM3   | NM_005184 | AGAUGAUCAGGGAGGCUGAtt   | UCAGCCUCCUGAUCAUCUca  | 203 |
| CALM3   | NM_005184 | GACUUCCCGGAGUCCUGAtt    | UCAGGAACUCCGGGAAGUCaa | 141 |
| CALM3   | NM_005184 | CGGAGUUCUGACCAUGAUtt    | AUCAUGGUCAGGAACUCCGgg | 154 |
| CAMK1   | NM_003656 | AUACAGCUCUAGAUAAAGAAAtt | UUCUUAUCUAGAGCUGUAUct | 112 |
| CAMK1   | NM_003656 | AGAUUUUGAAGGCCGAGUAtt   | UACUCGGCCUUCAAAUCUgt  | 242 |
| CAMK1   | NM_003656 | CCAUAGGUGUCAUCGCCUAtt   | UAGGCGAUGACACCUAUGGac | 375 |
| CAMK1D  | NM_020397 | GCUGUGAAGUGUAUCCCUAtt   | UAGGGAUACACUUCACAGCaa | 183 |
| CAMK1D  | NM_020397 | CCGAAGUGGUUUUJAGCUGAtt  | UCAGCUAAAACCACUUCGGaa | 327 |
| CAMK1D  | NM_020397 | CCAUCCGGAGUGAUUGCCUAtt  | UAGGCAAUCACUCCGAUGGac | 210 |
| CAMK1G  | NM_020439 | GAGUCUAAGCUUUUCGAGAtt   | UCUCGAAAAGCUUAGACUCcg | 171 |
| CAMK1G  | NM_020439 | GGAGGGCUACUAUGAGUUUtt   | AAACUCAUAGUAGCCCUCtt  | 261 |
| CAMK1G  | NM_020439 | GAAACGGAGUCUAAGCUUUtt   | AAAGCUUAGACUCCGUUUct  | 221 |
| CAMK2A  | NM_015981 | ACAUCGUCCGACUACAUGAtt   | UCAUGUAGUCGGACGAUGUtg | 142 |
| CAMK2A  | NM_015981 | GGACUCCAUCGAUUCUAUtt    | AUAGAAUCGAUGGAAGUCCag | 131 |
| CAMK2A  | NM_015981 | GGAGAUUUUGAGUCCUACAtt   | UGUAGGACUCAAAAUCUCCat | 142 |
| CAMK2B  | NM_001220 | GAGUGUCUGAAAAAGUUCAtt   | UGAACUUUUUCAGACACUCca | 137 |
| CAMK2B  | NM_001220 | CGCAGUACAUUGACGGGCAtt   | UGCCCGUCAAUUGACUGCGtg | 130 |
| CAMK2B  | NM_001220 | CGUUCUCCAUUGUCACCAAtt   | UUGGUGACAAUGGAGAACGgc | 126 |
| CAMK2D  | NM_172115 | GCAUAGCAUAUAUAGGCUtt    | AGCCUAAUAUAUGCUAUGCag | 172 |
| CAMK2D  | NM_172115 | GCGACUUCAUGAUAGCAUAtt   | UAUGCUAUCAUGAAGUCGCac | 92  |
| CAMK2D  | NM_172115 | GGGAUGGAUUUUCACCGAUtt   | AUCGGUGAAAAUCCAUCCTt  | 276 |



|         |           |                         |                        |     |
|---------|-----------|-------------------------|------------------------|-----|
| CAMK2G  | NM_172170 | CGAAAACAGGAGAUCAUUAtt   | UAAUGAUCUCCUGUUUUCGca  | 131 |
| CAMK2G  | NM_172170 | ACCAGAAACUAGAACGUGAtt   | UCACGUUCUAGUUUCUGGUga  | 111 |
| CAMK2G  | NM_172170 | GAUCAUUAAGAUUACAGAAAtt  | UUCUGUAAUCUUAUGAUctc   | 94  |
| CAMK2N1 | NM_018584 | GAAUGAUACAUAGAAAAGAtt   | UCUUUUCUAUGUAUCAUUCct  | 171 |
| CAMK2N1 | NM_018584 | GGAGCAAGCGGGUUGUUUAtt   | AUAACAACCCGCUUGCUCcg   | 384 |
| CAMK2N1 | NM_018584 | CUUUAGAAGUUUACAGGAAtt   | UUCCUGAUAAAUUCUAAAGat  | 305 |
| CAMK4   | NM_001744 | CUCUCAAAAGUGUUAAAGAAAtt | UUCUUUAACACUUUGAGAGca  | 169 |
| CAMK4   | NM_001744 | CGUAAGAACUGAGAUAGGAtt   | UCCUAUCUCAGUUCUACGat   | 163 |
| CAMK4   | NM_001744 | GCAGAUGCCGUUAAACAAAAtt  | UUUGUUUAACGGCAUCUGCag  | 97  |
| CAMKK1  | NM_172206 | GGAGGAGGUUAGAACUCAtt    | UGAGUUCUUAACCUCCUCctc  | 135 |
| CAMKK1  | NM_172206 | GGCCUACAACGAAAGUGAAAtt  | UUCACUUUCGUUGUAGGCCag  | 68  |
| CAMKK1  | NM_172206 | CUGAAGAUGUUAGACAAGAtt   | UCUUGUCUAACAUCUUCAGga  | 99  |
| CAMKK2  | NM_172215 | GGCACAUCAAGAUCGCUGAtt   | UCAGCGAUCUUGAUGUGCCca  | 241 |
| CAMKK2  | NM_172215 | GCAUCGAGUACUUACACUAtt   | UAGUGUAAGUACUCGAUGCct  | 144 |
| CAMKK2  | NM_172215 | CAAAGGCAUCGAGUACUUAtt   | UAAGUACUCGAUGCCUUUGat  | 405 |
| CAMKV   | NM_024046 | AGAUGAUUAUGAGAACCAUtt   | AUGGUUCUCAUAAUCAUCUtc  | 144 |
| CAMKV   | NM_024046 | CGGAGGUGACUGACAGAUAtt   | UAUCUGUCAGUCACCUCCGat  | 196 |
| CAMKV   | NM_024046 | CCAUUUGGGAUGAUUUUtt     | AAUAUCAUCCCAAUAUGGag   | 351 |
| CARKL   | NM_013276 | GCACAGACUCCAGACCCUAtt   | UAGGGUCUGGAGUCUGUGCag  | 34  |
| CARKL   | NM_013276 | GGAGCAGGAUGUGAGUAGAtt   | UCUACUCACAUCUCCUGCUCcg | 287 |
| CARKL   | NM_013276 | GGAGUCGUGUUUUGGAAAAtt   | UUUUCCAAACACGACUCCat   | 257 |
| CASK    | NM_003688 | GAGUUCGGCUGGUACAGUUtt   | AACUGUACCAGCCGAACUCtg  | 148 |
| CASK    | NM_003688 | GCUUUACAUGGUUUUCGAAtt   | UUCGAAAACCAUGUAAAGCat  | 233 |
| CASK    | NM_003688 | GGACGACAGAUCUAUGUAAtt   | UUACAUAGAUCUGUCGUCCtt  | 450 |
| CCRK    | NM_012119 | AGUAUGUGGUACAACUGAAAtt  | UUCAGUUGUACCACAUACUga  | 125 |
| CCRK    | NM_012119 | GAACGAUUAUGAACAGCUUtt   | AAGCUGUUCAAUAUCGUUCtt  | 217 |
| CCRK    | NM_012119 | GCCUUUGAGUUAUCUGCUGUtt  | ACAGCAUGAACUCAAGGCca   | 819 |
| CD2     | NM_001767 | CCCACAGAGUAGCUACUGAtt   | UCAGUAGCUACUCUGUGGGct  | 188 |
| CD2     | NM_001767 | GGUCUGGACAUCUAUCUCAtt   | UGAGAUAGAUGUCCAGACctt  | 187 |
| CD2     | NM_001767 | GGACAUCUAUCUCAUCAUtt    | AAUGAUGAGAUAGAUGUCcag  | 0   |
| CDC2    | NM_001786 | GAACUUCGUCAUCCAAAAtt    | UAUUUGGAUGACGAAGUUCct  | 255 |

|          |              |                        |                        |     |
|----------|--------------|------------------------|------------------------|-----|
| CDC2     | NM_001786    | GGUUAUAUCUCAUCUUUGAtt  | UCAAGAUGAGAUUAACctg    | 104 |
| CDC2     | NM_001786    | GAAUCUUUACAGGACUAUAtt  | UAUAGUCCUGUAAAGAUUCca  | 155 |
| CDC2L1   | NM_033492    | CAGUCUGCCGAAGAAGUAAtt  | UUACUUCUUCGGCAGACUGct  | 201 |
| CDC2L1   | NM_033492    | AAAUCGAUCAGAUCAACAAtt  | UUGUUGAUCUGAUCGAUUUct  | 88  |
| CDC2L1   | NM_033492    | AGAUCUACAUCGUGAUGAAtt  | UUCAUCACGAUGUAGAUCUtg  | 42  |
| CDC2L5   | NM_031267    | GGAACUUGCACAACUAGAAtt  | UUCUAGUUGUGCAAGUUCctg  | 80  |
| CDC2L5   | NM_031267    | GCUGAUAGCUUACGAGGAAtt  | UUCCUCGUAAGCUAUCAGCtt  | 127 |
| CDC2L5   | NM_031267    | CAGAUUGUCUAGAUCAGAtt   | UCUGGAUCUAGACAAUCUGtg  | 129 |
| CDC2L6   | NM_015076    | GGAUUUGUUUGAGUACGAAtt  | UUCGUACUCAAAACAAAUCctc | 203 |
| CDC2L6   | NM_015076    | GGUCAAGCCUGACAGCAAAtt  | UUUGCUGUCAGGCUUGACctt  | 160 |
| CDC2L6   | NM_015076    | GAUUCUUGAUGGUAUCCAAtt  | AUGGAUACCAUCAAGAAUCtg  | 265 |
| CDC42BPA | NM_003607    | CCGAAUCAUAGAUAUGAtt    | UCAUGAUCUAUGAUUGCGGct  | 123 |
| CDC42BPA | NM_003607    | CCAUAUCUCUCGGUGUACAtt  | UGUACACCGAGAGAUUGGtg   | 188 |
| CDC42BPA | NM_003607    | GAUGGAAGAUGGAACGGUAtt  | AACCGUCCAUCUCCAUCag    | 141 |
| CDC42BPB | NM_006035    | CGAGAACGGCAUAACGAGAtt  | UCUCGUUAUGCCGUUCUGct   | 122 |
| CDC42BPB | NM_006035    | CACUCAACUCCAUCGAAUAtt  | UAUUCGAUGGAGUUGAGUGtt  | 185 |
| CDC42BPB | NM_006035    | GGCUGAUCCUUUGCUAUGAtt  | UCAUAGCAAAGGAUCAGCCgt  | 172 |
| CDC42BPG | NM_017525    | GCAAGAUCAUGAACACGAtt   | UCGUGGUUCAUGAUCUUGCcg  | 199 |
| CDC42BPG | NM_017525    | GGAUGUGAACGGGCACAUAtt  | AAUGUGCCCGUUCACAUCcag  | 452 |
| CDC42BPG | NM_017525    | CAAACUCCCUGAUUCCCUAtt  | AAGGGAAUCAGGGAGUUUGag  | 416 |
| CDC42SE2 | NM_001038702 | CAGUGGAAUGAAUUCAGUAtt  | AACUGAAUUCAUCCACUGaa   | 225 |
| CDC42SE2 | NM_001038702 | CCCACAAACUUUGUGCAUAtt  | UAUGCACAAAGUUUGUGGGct  | 339 |
| CDC42SE2 | NM_001038702 | GGCGGAUUGACAGAAGUAUAtt | AUACUUCUGUCAAUCCGCCgt  | 226 |
| CDC7     | NM_003503    | GGCUAUUUCUACGAAAGUAtt  | AACUUUCGUAGAAAUAGCctt  | 146 |
| CDC7     | NM_003503    | GUACGGGAUAUAUGCUUAtt   | UAAGCAUAUAUUCCCGUACtt  | 183 |
| CDC7     | NM_003503    | GCAUUGUUUUGAUGAGUAUAtt | AUACUCAUCAAAACAAUGctc  | 188 |
| CDK10    | NM_003674    | GUUCCAACUUGCUCUAUGAtt  | UCAUGAGCAAGUUGGAAACct  | 655 |
| CDK10    | NM_003674    | GGCCUAUGGUGUCCCAGUAAtt | UACUGGGACACCAUAGGCCcg  | 283 |
| CDK10    | NM_003674    | AGAUCGACUUGAUCGUGCAtt  | UGCACGAUCAAGUCGAUCUgg  | 157 |
| CDK2     | NM_001798    | CGGAGCUUGUUAUCGCAAAtt  | UUUGCGAUACAAGCUCCGtc   | 153 |
| CDK2     | NM_001798    | GAGUCCCUGUUCGUACUAtt   | UAAGUACGAACAGGGACUCca  | 282 |

|       |           |                         |                        |     |
|-------|-----------|-------------------------|------------------------|-----|
| CDK2  | NM_001798 | CAAGAUCUCAAGAAAUUCAtt   | UGAAUUUCUUGAGAUCUUGgt  | 74  |
| CDK3  | NM_001258 | CCAGCUCUUUCGUAUCUUUtt   | AAAGAUACGAAAGAGCUGGtc  | 289 |
| CDK3  | NM_001258 | GAGCAUUGGUUGCAUCUUUtt   | AAAGAUGCAACCAAUGCUCca  | 97  |
| CDK3  | NM_001258 | AGCUCUAUCUGGUGUUUGAtt   | UCAAACACCAGAUAGAGCUtc  | 151 |
| CDK4  | NM_000075 | UGCUGACUUUUAACCCACAtt   | UGUGGGUJAAAAGUCAGCAtt  | 169 |
| CDK4  | NM_000075 | GGCUUUUGAGCAUCCCAAUtt   | AUUGGGAUGCUCAAAAGCCtc  | 120 |
| CDK4  | NM_000075 | CACCCGUGGUUGUUACACUtt   | AGUGUAACAACCACGGGUGta  | 345 |
| CDK5  | NM_004935 | GCAAUGAUGUCGAUGACCAtt   | UGGUCAUCGACAUCAUUGCcg  | 76  |
| CDK5  | NM_004935 | CCUCGAUCCUGAGAUUGUAtt   | UACAAUCUCAGGAUCGAGGtc  | 254 |
| CDK5  | NM_004935 | CGGGAGAUCUGCCUACUCAtt   | UGAGUAGGCAGAUUCUCCGga  | 258 |
| CDK6  | NM_001259 | GUUUGUAACAGAUAUUGAUtt   | AUCGAUAUCUGUUACAAActt  | 400 |
| CDK6  | NM_001259 | GGAUUAUGAUGUUUCAGCUUtt  | AAGCUGAAACAUCAUAUCctt  | 137 |
| CDK6  | NM_001259 | GCAGAAAUGUUUCGUAGAAtt   | UUCUACGAAACAUUUCUGCaa  | 145 |
| CDK7  | NM_001799 | CAACAUUGGAUCCUACAUAAtt  | UAUGUAGGAUCCAAUGUUGat  | 202 |
| CDK7  | NM_001799 | CCUUAAGGAGCAAUCAAAtt    | UUUGAUUGCUCUUUAAGGtt   | 158 |
| CDK7  | NM_001799 | GGACAUAAGAUAGAGAAGCUAtt | UAGCUUCUGAUCUAUGUCCaa  | 76  |
| CDK8  | NM_001260 | CAAACUAGUAAUCCUUAUtt    | AUAAGGAUUACUAGUUUUGat  | 277 |
| CDK8  | NM_001260 | CCCUUACCCAAAACGAGAAtt   | UUCUCGUUUUGGGUAAGGgat  | 173 |
| CDK8  | NM_001260 | GGCUAUAGGGUGUAUAUUUtt   | AAUAUACACCCUAUAGCCca   | 84  |
| CDK9  | NM_001261 | UGAGAUUUGUCGAACCAAAtt   | UUUGGUUCGACAAAUCUCAat  | 157 |
| CDK9  | NM_001261 | CCGCUGCAAGGGUAGUAUAAtt  | UAUACUACCCUUGCAGCGGtt  | 161 |
| CDK9  | NM_001261 | GAAGUUUCCAAAUACGAGAtt   | UCUCGUUUUGGAAACUUCat   | 243 |
| CDKL1 | NM_004196 | GUACUUCAGUGGAGUGAAAtt   | UUUCACUCCACUGAAGUActg  | 116 |
| CDKL1 | NM_004196 | GGACCGAGUGACUACUAUAAtt  | UAUAGUAGUCACUCGGUCCag  | 209 |
| CDKL1 | NM_004196 | CGAAUGCUCUAGCAACUCAtt   | UGAGUUGCUUGAGCAUUCGga  | 171 |
| CDKL2 | NM_003948 | GGUUGGUGAUGUCAAGUAUtt   | AUACUUGACAUCACCAACCaa  | 144 |
| CDKL2 | NM_003948 | GUGUUUAGGUAAUCUAAUUtt   | AAUUAGAUUACCUAAACACat  | 218 |
| CDKL2 | NM_003948 | GAUCAGCUAUUAUCAUAUUAtt  | UAAUAUGAUUAUAGCUGAUcaa | 447 |
| CDKL3 | NM_016508 | CUAUCAAUCCCAGCACUAAtt   | UUAGUGCUGGGAUUGAUAGgg  | 198 |
| CDKL3 | NM_016508 | GGAUUAUCAUCUAGUGAUCUtt  | AGAUCACUAGAUGAUAUCCtg  | 116 |
| CDKL3 | NM_016508 | CUAUCUCCUAGUAGUUCUtt    | AGAACUACUAGGAAGAUAGgg  | 171 |

|       |              |                        |                        |     |
|-------|--------------|------------------------|------------------------|-----|
| CDKL4 | NM_001009565 | GUAUGUUGAAGCAAUAAAAtt  | UUUAAUUGCUUCAACAUCgt   | 100 |
| CDKL4 | NM_001009565 | GAAUCCAGAUGACAGAUUAtt  | UAAUCUGUCAUCUGGAUUCat  | 58  |
| CDKL4 | NM_001009565 | CGAUUAUGUAGCUACGAGAtt  | UCUCGUAGCUACAUAUUCGgt  | 127 |
| CDKL5 | NM_001037343 | GAGUCGGCAUAGCUAUUUUtt  | AAUAUAGCUAUGCCGACUCtg  | 109 |
| CDKL5 | NM_001037343 | CUAUGUAUGUGACCCGUGAtt  | UCACGGGUCACAUAUCAUGaa  | 133 |
| CDKL5 | NM_001037343 | GAAUGAUUUUGUCCAUCGAtt  | UCGAUGGACAAUAUCAUUCtt  | 149 |
| CERK  | NM_022766    | GUCAAAUACCAAUGCUUUAtt  | UAAAGCAUUGGUUUUUGACat  | 120 |
| CERK  | NM_022766    | UGAACAUUCUUGUCCUUUUAtt | UAAAAGGACAAGAUGUUCAat  | 137 |
| CERK  | NM_022766    | AGUUUGUUACUGUUAAAAUtt  | AUUUUAAACAGUAACAAACUtg | 132 |
| CERKL | NM_001030313 | GGUUUAGACAGUUCAAGAAAtt | UUCUUGAACUGUCUAAACCat  | 108 |
| CERKL | NM_001030313 | GCAUCAGAGGUCCAUAUUAtt  | UAAUAUGGACCUCUGAUGCaa  | 308 |
| CERKL | NM_001030313 | GCAGAGAAGUGGUACUUUAtt  | UAAAGUACCACUUCUCUGCtg  | 250 |
| CHEK1 | NM_001274    | GACACGAUUCUUUACCAAAtt  | UUUGGUAAAGAAUCGUGUCat  | 218 |
| CHEK1 | NM_001274    | GCAUGGUUUUGGAAUAACUtt  | AGUUUUUCCAUAACCAUGCag  | 306 |
| CHEK1 | NM_001274    | GCAACAGUAUUUCGGUAUAtt  | UAUACCGAAUACUGUUGCca   | 225 |
| CHEK2 | NM_145862    | GAUCAGUCAGUUUAUCCUAtt  | UAGGAUAAACUGACUGAUCat  | 85  |
| CHEK2 | NM_145862    | GGCACGUUUUACGACAGAAAtt | UUCUGUCGUAAAACGUGCtt   | 130 |
| CHEK2 | NM_145862    | GCACUGUCACUAAGCAGAAAtt | UUCUGCUUAGUGACAGUGCaa  | 114 |
| CHKA  | NM_212469    | GGAAAAGUAUCUAAAGGAAtt  | UUCCUUUAGAUACUUUUCat   | 263 |
| CHKA  | NM_212469    | CAAUGGAAAAGUAUCUAAAAtt | UUUAGAUACUUUCCAUAUGtg  | 388 |
| CHKA  | NM_212469    | GCUUGAAGUUAAUAGGUUUtt  | AAACCUAUUAAACUUCAAGCaa | 80  |
| CHUK  | NM_001278    | GGACUAAAAGAAGACUAUAtt  | UAUAGUCUUCUUUAGUCCag   | 156 |
| CHUK  | NM_001278    | GAAGGAUCCAAAGUGUAUAtt  | UAUACACUUUGGAUCCUUCtt  | 395 |
| CHUK  | NM_001278    | GCCUAGAGCUAAGUACCAAtt  | UUGGUACUUAGCUCUAGGCga  | 102 |
| CIB1  | NM_006384    | AGACAUCAAGUCCAUUUAtt   | AUAAUGGGACUUGAUGUCUgg  | 242 |
| CIB1  | NM_006384    | CGUCAUCUCCCGUUCUCCAtt  | UGGAGAACGGGAGAUGACGtg  | 152 |
| CIB1  | NM_006384    | ACGGAACCUUGAACAGAGAtt  | UCUCUGUUCAAGGUUCCGUca  | 415 |
| CIB4  | NM_001029881 | GAAGAUUGAGUAUGCCUUUtt  | AAAGGCAUACUCAAUUCUcag  | 69  |
| CIB4  | NM_001029881 | GAACAGUGAUGACAUGUCUtt  | AGACAUGUCAUCACUGUUCag  | 141 |
| CIB4  | NM_001029881 | AGUCGGAUCUGGACAAUGAtt  | UCAUUGUCCAGAUCGACUca   | 100 |
| CIT   | NM_007174    | GGAAGGUGAUGACCGUCUAtt  | UAGACGGUCAUCACCUUCcag  | 140 |

|        |           |                        |                        |     |
|--------|-----------|------------------------|------------------------|-----|
| CIT    | NM_007174 | CGUGGAUUCUUACGGAAGAtt  | UCUUCGGUAAGAAUCCACGaa  | 168 |
| CIT    | NM_007174 | GAUUCUUACGGAAGACGUAtt  | UACGUCUUCGGUAAGAAUCCa  | 277 |
| CKB    | NM_001823 | AGUUCUCGGAGGUGCUUAAtt  | UUAAGCACCUCGAGAACUtc   | 271 |
| CKB    | NM_001823 | UCACCCAGAUUGAAACUCUtt  | AGAGUUUCAAUCUGGGUGAgg  | 240 |
| CKB    | NM_001823 | GAAACUCUCUUAAGUCUAtt   | UAGACUUGAAGAGAGUUUCaa  | 121 |
| CKM    | NM_001824 | GAAGAUUGAGGAGAUCUUUtt  | AAAGAUCUCCUCAAUUCUUCtg | 360 |
| CKM    | NM_001824 | CCCUUGAACUCUACAAGAAtt  | UUCUUGUAGAGUUCAAGGgtc  | 300 |
| CKM    | NM_001824 | AGACUGACCUCAACCAUGAtt  | UCAUGGUUGAGGUCAGUCUtg  | 190 |
| CKMT1B | NM_020990 | GCACACCACGGAUCUAGAUtt  | AUCUAGAUCCGUGGUGUGCtt  | 238 |
| CKMT1B | NM_020990 | GUAUUGUCCUCUAGAGUCAtt  | UGACUCUAGAGGACAAUACat  | 323 |
| CKMT1B | NM_020990 | AGGUAUGUAUUGUCCUCUAtt  | UAGAGGACAAUACAUACCUct  | 108 |
| CKMT2  | NM_001825 | GACCCACGCUUUUCUAAGAtt  | UCUUAGAAAAGCGUGGGUCct  | 400 |
| CKMT2  | NM_001825 | GGAUAAAUGAGGAGGAUCAtt  | UGAUCCUCCUCAUUUAUCCag  | 329 |
| CKMT2  | NM_001825 | GAGGCAAUAUGAAACGAGUtt  | ACUCGUUUCAUAUUGCCUCct  | 117 |
| CLK1   | NM_004071 | CAUUUCGACUGGAUCAUAUtt  | AUAUGAUCCAGUCGAAAUGgt  | 68  |
| CLK1   | NM_004071 | CUAUCUUGGGUUUACCGUAtt  | UACGGUAAACCCAAGAUAGta  | 143 |
| CLK1   | NM_004071 | CUGUCAGAGUGGAGACGUAtt  | UACGUCUCCACUCUGACAGat  | 147 |
| CLK2   | NM_003993 | GCUACAGACGCAACGAUUAtt  | UAAUCGUUGCGUCUGUAGctg  | 276 |
| CLK2   | NM_003993 | GCUCUUCGAUCUGAUUGAAtt  | UUCAAUCAGAUCGAAGAGctg  | 141 |
| CLK2   | NM_003993 | GAGCGAUUAUGAAAUCGUUAtt | UAACGAUUUCAUAUCGCUCtt  | 166 |
| CLK3   | NM_001292 | GCCGGUAUGUGAAGGAGAAtt  | UUCUCCUUCACAUACCGGCcg  | 115 |
| CLK3   | NM_001292 | CUACAGUCGGGAACAUGAAtt  | UUCAUGUUCGACUGUAGga    | 96  |
| CLK3   | NM_001292 | AGCUACCGAUGGAAGAGGAtt  | UCCUCUUCCAUCGGUAGCUca  | 233 |
| CLK4   | NM_020666 | GGAGAUACGUUGACGAAUAtt  | UAUUCGUCAACGUAUUCUCCgg | 195 |
| CLK4   | NM_020666 | GCACUAAAUAUAGUACUGAUtt | AUCAGUACUAUUUAAGUGCtc  | 186 |
| CLK4   | NM_020666 | CCAGCUAGAUUGGGAUGAAtt  | UUCAUCCCAAUCUAGCUGGtt  | 60  |
| CMPK   | NM_016308 | GGAAGGCAGAUGUAUCUUUtt  | AAAGAUACAUCUGCCUUCcCa  | 263 |
| CMPK   | NM_016308 | GAUUGAUGGGUUUCCAAGAtt  | UCUUGGAAACCCAUCAAUcCa  | 273 |
| CMPK   | NM_016308 | GAAAGAUUGUACCAGUUGAtt  | UCAACUGGUACAAUCUUUCct  | 263 |
| CNKS1  | NM_006314 | CUGCUACAGUGAGACCGAAtt  | UUCGGUCUCACUGUAGCAGtc  | 109 |
| CNKS1  | NM_006314 | CAUUGGGCCUAGAAAUUCAtt  | UGAAUUUCUAGGCCCAAUGga  | 121 |

|          |              |                        |                        |     |
|----------|--------------|------------------------|------------------------|-----|
| CNKSR1   | NM_006314    | CCAUGACUCCAGAGCAUAtt   | UAUGCUCUGGAAGUCAUGGgt  | 153 |
| CNKSR3   | NM_173515    | GAAGUUCACUACCAAACAtt   | UGUUUGGUAAGUGAACUUCct  | 132 |
| CNKSR3   | NM_173515    | GGUGCUACAUCAACUCAGAtt  | UCUGAGUUGAUGUAGCACctg  | 106 |
| CNKSR3   | NM_173515    | GGUACUCGGUGGAAACCAAtt  | UUGGUUUCACCGAGUACCca   | 147 |
| COASY    | NM_001042529 | GGGUGUUUGGGAUAAGAAtt   | UUCUUAUUCCCAAACACCCg   | 210 |
| COASY    | NM_001042529 | GACGCAUUGUGGAGAGGGAtt  | UCCCUCUCCACAAUGCGUCtt  | 440 |
| COASY    | NM_001042529 | AGAUACUCACGGACAUAUAtt  | AUAAUGUCCGUGAGUAUCUtc  | 207 |
| COL4A3BP | NM_031361    | GGCAGUUGGUUGUAGAAGAtt  | UCUUCUACAACCAACUGCCaa  | 72  |
| COL4A3BP | NM_031361    | CGAGACGUAAUUAUCUUUtt   | AAAGAUUAUACGUCUCGct    | 201 |
| COL4A3BP | NM_031361    | GGUGACUUCUUGCAUAGUAtt  | UACUAUGCAAGAAGUCACCat  | 318 |
| CRKRS    | NM_016507    | CCGAAGAAGCAAUAUCGAAtt  | UUCGAUUAUUGCUUCUUCGGtt | 257 |
| CRKRS    | NM_016507    | GGACUUACUAAAAGCUAAAAtt | UUUAGCUUUUAGUAAGUCc    | 122 |
| CRKRS    | NM_016507    | GGACUUGCUCGGCUCUAUAtt  | UAUAGAGCCGAGCAAGUCaa   | 224 |
| CSF1R    | NM_005211    | GUUGAGACCUUAGAGCACAtt  | UGUGCUCUAAGGUCUCAACag  | 269 |
| CSF1R    | NM_005211    | CCUCAACCUCGAUCAAGUAtt  | UACUUGAUCGAGGUUGAGGgt  | 350 |
| CSF1R    | NM_005211    | CAUAAUAACCGUUACCAAAtt  | UUUGGUAACGGUUUAUUUGaa  | 140 |
| CSK      | NM_004383    | GGAACAAAGUCGCCGUCAAtt  | UUGACGGCGACUUUGUUCct   | 512 |
| CSK      | NM_004383    | CGAUUACCGAGGGAACAAAtt  | UUUGUUCUCCGUAUUCGcc    | 378 |
| CSK      | NM_004383    | CGCGCCUCAUUAACCAAAtt   | UUUGGUUUAAUGAGGCGGta   | 182 |
| CSNK1A1  | NM_001892    | GAUGAUCAGUAGAAUUGAAtt  | UUCAAUUCUACUGAUCAUCtg  | 66  |
| CSNK1A1  | NM_001892    | CAGUGAAGCUAGAAUCUCAtt  | UGAGAUUCUAGCUUCACUGcc  | 388 |
| CSNK1A1  | NM_001892    | GAAUUUGCGAUGUACUUAAtt  | UUAAGUACAUCGCAAUUCtg   | 87  |
| CSNK1A1L | NM_145203    | AGAAUUUUCUACACCGAGAtt  | UCUCGGUGUAGAAAAUUCUtt  | 141 |
| CSNK1A1L | NM_145203    | AGAUGAUCAGCAGAAUUGAtt  | UCAAUUCUGCUGAUCAUCUgg  | 86  |
| CSNK1A1L | NM_145203    | AACUCUACACGAUUCUUCAtt  | UGAAGAAUCGUGUAGAGUUt   | 222 |
| CSNK1D   | NM_139062    | GGAUUAGCGAGAAGAAAAUtt  | AUUUUCUUCUCGCUAAUCctt  | 205 |
| CSNK1D   | NM_139062    | UGAUCAGUCGCAUCGAAUAtt  | UAUUCGAUGCGACUGAUCAtt  | 435 |
| CSNK1D   | NM_139062    | CACGCACCUUGGAAUUGAAtt  | UUCAAUCCAAGGUGCGUGtt   | 44  |
| CSNK1E   | NM_001894    | CCUCCGAAUUCUCAACAAtt   | UAUGUUGAGAAUUCGGAGGga  | 284 |
| CSNK1E   | NM_001894    | GCUUUUACGUGGUUGUUAAtt  | UUAACAACCACGAUAAAGCtc  | 218 |
| CSNK1E   | NM_001894    | UCGUGGUUGUUAUUUGAAtt   | UUCAAAUUAACAACCACGAta  | 149 |

|         |           |                        |                        |     |
|---------|-----------|------------------------|------------------------|-----|
| CSNK1G1 | NM_022048 | CAGCUUCAUUUAGAGUACAtt  | UGUACUCUAAAUGAAGCUGtg  | 139 |
| CSNK1G1 | NM_022048 | CCUUCGAUAUUGUCAGGCGAtt | UCGCCUGACAUAUCGAAGGta  | 240 |
| CSNK1G1 | NM_022048 | GGACUUCUUUGAAAAACCUtt  | AGGUUUUUCAAAGAAGUCcag  | 181 |
| CSNK1G2 | NM_001319 | GCCUGGACUUCUUCGAGAAtt  | UUCUCGAAGAAGUCCAGGCgc  | 218 |
| CSNK1G2 | NM_001319 | GAAUCUCUAUACAAAUGAAtt  | UUCAUUUGUAUAGAGAUUCtt  | 101 |
| CSNK1G2 | NM_001319 | GCUUCGUGUUCGACUAUGAtt  | UCAUAGUCGAACACGAAGCca  | 130 |
| CSNK1G3 | NM_004384 | GGAGAAUUACGAUUAGGGAtt  | UCCCUAAUCGUAAUUCUCcAa  | 394 |
| CSNK1G3 | NM_004384 | GAGACGAUUUAGAAGCUUUtt  | AAAGCUUCUAAAUCGUCUCtt  | 264 |
| CSNK1G3 | NM_004384 | CUGACUUGUUUGAUCGAAAtt  | UUUCGAUCAAAACAAGUCAGta | 186 |
| CSNK2A1 | NM_001895 | GGCUCGAAUGGGUUCAUCUtt  | AGAUGAACCCAUUCGAGCCtg  | 295 |
| CSNK2A1 | NM_001895 | AGAUGUACGAUUUAGUUUtt   | AAACUAUAAUCGUACAUCUga  | 274 |
| CSNK2A1 | NM_001895 | GAUCCACGUUUCAAUGAUAtt  | UAUCAUUGAAACGUGGAUCta  | 283 |
| CSNK2A2 | NM_001896 | GGAGUACAAUGUUCGUGUAtt  | UACACGAACAUUGUACUCctg  | 367 |
| CSNK2A2 | NM_001896 | GAUCCACACUUCAACGAUAtt  | UAUCGUUGAAGUGUGGAUCta  | 359 |
| CSNK2A2 | NM_001896 | GCAUGAUCUUUCGAAGGGAtt  | UCCCUUCGAAAGAUCAUGCtt  | 142 |
| DAK     | NM_015533 | GAGCUGAUCUGUUACAAGUtt  | ACUUGUAAACAGAUCAGCUCct | 186 |
| DAK     | NM_015533 | CCGCCGAUGAGAUUGUGAAtt  | UUCACAAUCUCAUCGGCGGtt  | 479 |
| DAK     | NM_015533 | UGCCCAUGCUGGUUUCAUAtt  | UAUGAAACCAGCAUGGGCAgg  | 263 |
| DAPK1   | NM_004938 | GAUCAAGCCUAAAGAUACAtt  | UGUAUCUUUAGGCUUGAUcCa  | 252 |
| DAPK1   | NM_004938 | GGCUGUAACGUGAACAUCAtt  | UGAUGUUCACGUUACAGCCgg  | 111 |
| DAPK1   | NM_004938 | GGGACACCUCCAUUACUCAtt  | UGAGUAAUGGAGGUGUCCgt   | 289 |
| DAPK2   | NM_014326 | GAAAAUUGCUCACUUUGAUtt  | AUCAAAAGUGAGCAAUUUUCtt | 115 |
| DAPK2   | NM_014326 | CGGAAUUUGUUGCUCAGAtt   | UCUGGAGCAACAAAUUCCGgc  | 153 |
| DAPK2   | NM_014326 | GGACUUUUAUUCGGAAGCUUtt | AAGCUUCCGAAUAAAGUCctt  | 219 |
| DAPK3   | NM_001348 | AGUUUGCGAUCGUGCGGAAtt  | UUCCGCACGAUCGCAAACUgg  | 193 |
| DAPK3   | NM_001348 | CCAACAUCUCAGCCGUGAAtt  | UUCACGGCUGAGAUUUGGtg   | 340 |
| DAPK3   | NM_001348 | GAGGAGUACUUCAGCAACAtt  | UGUUGCUGAAGUACUCCUcgt  | 114 |
| DCAKD   | NM_024819 | AGCACACCGUGGUAGUAUAtt  | UAUACUACCACGGUGUGCUtc  | 144 |
| DCAKD   | NM_024819 | GUACAGUAAUUAGCCGAAAtt  | UUUCGGCUAAUUACUGUAcTg  | 357 |
| DCAKD   | NM_024819 | ACCGCUACGUGAUUCUGGAtt  | UCCAGAAUCACGUAGCGGUat  | 223 |
| DCK     | NM_000788 | CAACUUCGAUUUAUCUCAAAtt | UUGAAGAUAAUCGAAGUUGgt  | 161 |

|       |              |                        |                        |     |
|-------|--------------|------------------------|------------------------|-----|
| DCK   | NM_000788    | CAAUGUCAAAGUACUCAAtt   | UUGAGUACUUUGAACAUUGca  | 136 |
| DCK   | NM_000788    | GCAUCUAAUUUGUAUGAAUtt  | AUUCAUACAAAUUAGAUGCaa  | 129 |
| DCLK1 | NM_004734    | CGAUUAAAAGUCGGAAGAAtt  | UUCUUCCGACUUUUAUUCGtt  | 98  |
| DCLK1 | NM_004734    | GAUCGACUGCUAGAGAGUAtt  | UACUCUCUAGCAGUCGAUCtt  | 254 |
| DCLK1 | NM_004734    | GAAAGUUCGUUUUCUAUCGAtt | UCGAUAGAAACGAACUUUCtt  | 405 |
| DCLK2 | NM_001040261 | CAGAUGCUCUGAAUCAUCAtt  | UGAUGAUUCAGAGCAUCUGtt  | 140 |
| DCLK2 | NM_001040261 | GAUCCUCAGCUGUUAAGUAtt  | UACUUAACAGCUGAGGAUCga  | 112 |
| DCLK2 | NM_001040261 | GCAAUUUUGCAGUAGUCAAtt  | UUGACUACUGCAAAAUUGCca  | 128 |
| DCLK3 | XM_940612    | GAAUGACCGUGUGAGGAAAtt  | UUUCCUCACACGGUCAUUCtt  | 55  |
| DCLK3 | XM_940612    | CCACUGACACUGAAGAGCAtt  | UGCUCUUCAGUGUCAGUGGtt  | 75  |
| DCLK3 | XM_940612    | GACGAGCUCUUUAACAUCAtt  | UGAUGUUAAAGAGCUCGUCct  | 78  |
| DDR1  | NM_001954    | CUCAAGAUCUGGUUAGUCUtt  | AGACUAACCAGAUCUUGAGgg  | 156 |
| DDR1  | NM_001954    | CCAUCAAAAUCGCAGACUUt   | AAGUCUGCGAUUUUGAUGGtg  | 38  |
| DDR1  | NM_001954    | GGCUAUGCAGGUCCACUGUtt  | ACAGUGGACCUGCAUAGCctg  | 138 |
| DDR2  | NM_006182    | CCUAUGAUCCAUGCUUAAtt   | UUAAGCAUUGGAUCAUAGGtt  | 163 |
| DDR2  | NM_006182    | GCACUGUCAGUUACACCAAtt  | UUGGUGUAACUGACAGUGCgt  | 191 |
| DDR2  | NM_006182    | GGUUUUAUGAGAAUACUGGAtt | UCCAGUAUUCUCAUAACctg   | 156 |
| DGKA  | NM_201554    | GGAUCGUAAAAAUAGCAAAtt  | UUUGCUAUUUUUACGAUCcgg  | 156 |
| DGKA  | NM_201554    | GCAUCGCAGUGCUAACAUCAtt | AUGUUUAGCACUGCGAUGCct  | 125 |
| DGKA  | NM_201554    | CCGGAGAAGUUCAACAGCAtt  | UGCUGUUGAACUUCUCCGGat  | 113 |
| DGKB  | NM_145695    | GGCUUAGAAAAUAACGUGAtt  | UCACGUUAAUUUCUAAGCCca  | 168 |
| DGKB  | NM_145695    | GACAUUGUCUGUUACCUGUtt  | ACAGGUAAACAGACAAUGUCct | 107 |
| DGKB  | NM_145695    | GGUUUUGGAUUGCAUAGAAtt  | UUCUAUGCAAUCCAAAACCca  | 72  |
| DGKD  | NM_152879    | CCCUAGAGUAUUACACGGAtt  | UCCGUGUAAUACUCUAGGGtt  | 92  |
| DGKD  | NM_003648    | GGCUUACGGUUAUUCAGAtt   | UCUGGAAUAACCGUAAGCCga  | 282 |
| DGKD  | NM_003648    | CAGAAACCCUAGAGUAUUAtt  | UAAUACUCUAGGGUUUCUGgt  | 232 |
| DGKE  | NM_003647    | GGAAUUAACUAGAUCGAUtt   | AUCGAUCUAGUUUAAUUCcat  | 100 |
| DGKE  | NM_003647    | GGCUAAUCCUUUUCGAAUAtt  | UAUUCGAAAAGGAUUAGCCcag | 255 |
| DGKE  | NM_003647    | CUCUCGUAGUGGAACUAAUtt  | AUUAGUUCACUACGAGAtt    | 521 |
| DGKG  | NM_001346    | GUGUCAAACGUACUCAAAtt   | UUUGAGUACGUUUUGACACaa  | 134 |
| DGKG  | NM_001346    | CAGAUACUAAUACAGAAtt    | UUCUGUAUUAUAGUAUCUGcg  | 125 |



|               |              |                        |                        |     |
|---------------|--------------|------------------------|------------------------|-----|
| DGKG          | NM_001346    | CAGCGCAGAUACUAAUUAUAtt | UAUAAUAGUAUCUGCGCUGtt  | 164 |
| DGKH          | NM_152910    | GGAGUAUAAUGACUAUUGAtt  | UCAUAUGUCAUUAUACUCCac  | 108 |
| DGKH          | NM_152910    | GGAUUGGAUUAGAUGCAAAtt  | UUUGCAUCUAAUCCAUCcCa   | 103 |
| DGKH          | NM_152910    | GGAGUUCGAUUAUCAACAAtt  | UUGUUGAUAAUCGAACUCCca  | 129 |
| DGKI          | NM_004717    | GGGUGAACAAAAUCAGUUUtt  | AAACUGAUUUUGUUCACCCgg  | 170 |
| DGKI          | NM_004717    | CCGAGAAGCUUCUAUUUCAtt  | UGAAAUAGAAGCUUCUCGGag  | 188 |
| DGKI          | NM_004717    | CCUUCGAGUUUAUUGGAUAtt  | UAUCCAUAACUCGGAAGGtc   | 277 |
| DGKK          | NM_001013742 | CACCUGAAUCUAUACGCUUtt  | AAGCGUAUAGAUUCAGGUGta  | 117 |
| DGKK          | NM_001013742 | GGAGUGUGAUGAUUCGUGAtt  | UCACGAAUCAUCACACUCCat  | 101 |
| DGKK          | NM_001013742 | GAAUUGGACUGGAUGCUAAtt  | UUAGCAUCCAGUCCA AUUCcg | 82  |
| DGKQ          | NM_001347    | GGAUUGCCCAGGGUUCCUAtt  | UAGGAACCCUGGGCAAUCCgg  | 164 |
| DGKQ          | NM_001347    | GGAAGCUACUGAACCCUCAtt  | UGAGGGUUCAGUAGCUUCcgg  | 105 |
| DGKQ          | NM_001347    | AGAUCGUGCAGAUAGUAAtt   | UUACUCAUCUGCACGAUCUtg  | 97  |
| DGKZ          | NM_201532    | GCACAGGAUGAGAUUUUAUAtt | UAUAAAUCUCAUCCUGUGCga  | 82  |
| DGKZ          | NM_201532    | GCCGCUUUCGGAUAAGAAtt   | AUCUUAUUCGAAAGCGGctg   | 184 |
| DGKZ          | NM_201532    | CGACAAGUCUUCGACCUGAtt  | UCAGGUCGAAGACUUGUCGgg  | 174 |
| DGUOK         | NM_080916    | CACGAAAACUUACCCAGAAAtt | UUCUGGGUAAGUUUUCGUGag  | 357 |
| DGUOK         | NM_080916    | GAAACUUGCUGGAUAUGAUtt  | AUCAUAUCCAGCAAGUUUCca  | 112 |
| DGUOK         | NM_080916    | GGAUGUCAUAUGAUUUUtt    | AAAUCAUCAUUGACAUCcAa   | 176 |
| DKFZp434B1231 | NM_178275    | GAAGUGUGACUGUCACUAAtt  | UUAGUGACAGUCACACUUCtt  | 94  |
| DKFZp434B1231 | NM_178275    | GAGUCAUCUUUAAGCAAGAtt  | UCUUGCUUAAAGAUGACUCcCa | 75  |
| DKFZp434B1231 | NM_178275    | GGAAGCCGGUGAUAGUGAAtt  | UUCACUAUACCCGGCUUCcCa  | 132 |
| DKFZp761P0423 | XM_937796    | CACUUUAGCUAUUCGUUGAtt  | UCAACGAAUAGCUAAAGUGag  | 116 |
| DKFZp761P0423 | XM_937796    | GAGAAUAACUGGUCGCUCUtt  | AGAGCGACCAGUUUAUUCUCat | 164 |
| DKFZp761P0423 | XM_937796    | GGCACCUUCUAAAAAUGAAtt  | UUCAUUUUUAGAAGGUGCCgc  | 57  |
| DMPK          | NM_001081560 | GCAAGAUCGUCCACUACAAtt  | UUGUAGUGGACGAUCUUGCcCa | 161 |
| DMPK          | NM_001081560 | GCACUUCGCCUUCAGGAUtt   | AUCCUGGAAGGCGAAGUGCag  | 80  |
| DMPK          | NM_001081560 | AGAUCGUCCACUACAAGGAtt  | UCCUUGUAGUGGACGAUCUtg  | 93  |
| DNAJC6        | NM_014787    | CACUGGAUGUAGAACUACAAtt | UGUAGUUCUACAUCCAGUGtc  | 62  |
| DNAJC6        | NM_014787    | CCCUAUGAACAAUACGCAAtt  | UUGCGUAUUGUUCAUAGGGtt  | 135 |
| DNAJC6        | NM_014787    | CGACCCAACUACAACGUGAtt  | UCACGUUGUAGUUGGGUCgt   | 395 |

|         |              |                        |                       |     |
|---------|--------------|------------------------|-----------------------|-----|
| DTYMK   | NM_012145    | UGCCGUUAAUUAAGGAAAAtt  | UUUCCUUAUUAAACGGCAAct | 213 |
| DTYMK   | NM_012145    | GAUCAACUGAAAUCGGCAAtt  | UUGCCGAUUUCAGUUGAUCtt | 137 |
| DTYMK   | NM_012145    | GAUGGUGGAUGCUUCCAAAtt  | UUUGGAAGCAUCCACCAUCtt | 221 |
| DYRK1A  | NM_130438    | CAAGCAUAAUUAUGAGGUUtt  | AACCUCAUUAAUAUGCUUGta | 136 |
| DYRK1A  | NM_130438    | CCGUAAACUUCAUAACAUtt   | AAUGUUAUGAAGUUUACGGgt | 163 |
| DYRK1A  | NM_130438    | GCUGACUACUUGAAGUUCAtt  | UGAACUUCAAGUAGUCAGCga | 188 |
| DYRK1B  | NM_004714    | CAUCA AUGAGGUAUACUAUtt | AUAGUAUACCUCAUUGAUGtg | 78  |
| DYRK1B  | NM_004714    | GGACGAAAGAACUCAGGAAtt  | UUCCUGAGUUCUUUCGUCtt  | 213 |
| DYRK1B  | NM_004714    | GGCACUUCAUGUUCGGAAAtt  | UUCGGAAACAUGAAGUGCCgc | 306 |
| DYRK2   | NM_003583    | GCCUUUGGUUCGCAAGUUtt   | AAACUUGCGAACCAAAGGCag | 182 |
| DYRK2   | NM_003583    | CCCUAAAGAUGGUGCGGAAtt  | UUCCGCACCAUCUUUAGGGcc | 150 |
| DYRK2   | NM_003583    | CCGGUGCUAUCACAUCUAUtt  | AUAGAUGUGAUAGCACCGGtg | 145 |
| DYRK3   | NM_001004023 | CGGAUUUUGGAGCAUCUUAtt  | UAAGAUGCUCCAAAAUCCGga | 150 |
| DYRK3   | NM_001004023 | GAAAAGACAUGGAGUUAAUtt  | AAUAAUCUCAUGUCUUUUCtt | 165 |
| DYRK3   | NM_001004023 | CCAUCUAGCUUAUCGAUAUtt  | AUAUCGAUAAGCUAGAUGGtc | 231 |
| DYRK4   | NM_003845    | GUUAUACACGUACAUCCAAAtt | UUUGGAUGUACGUGUAUACtt | 119 |
| DYRK4   | NM_003845    | GGACAGAGCAAAAACUUCUtt  | AGAAGUUUUUGCUCUGUCctg | 214 |
| DYRK4   | NM_003845    | CCUACAAUGUGGUGCAUAUtt  | AUAUGCACCACAUUGUAGGtg | 191 |
| EEF2K   | NM_013302    | GCUCGAACCAGAAUGUCAAtt  | UUGACAUUCUGGUUCGAGCtt | 100 |
| EEF2K   | NM_013302    | GCGACGAUGAGGAAGGUUAtt  | UAACCUUCCUCAUCGUCGctg | 140 |
| EEF2K   | NM_013302    | GGAUUUGAUUACUUACUAAtt  | UUAGUAAGUAAUCAAAUCtt  | 182 |
| EGFR    | NM_005228    | GAAUAGGUAAUUGGUGAAUtt  | AAUUCACCAAUACCUAUUCcg | 234 |
| EGFR    | NM_005228    | CCAUAAAUGCUACGAAUAUtt  | AUAUUCGUAGCAUUUAUGGag | 220 |
| EGFR    | NM_005228    | GAUCUUUCCUUCUUAAGAtt   | UCUUUAAGAAGGAAAGAUcat | 121 |
| EIF2AK1 | NM_014413    | GAUUAAGGGUGCAACUAAAtt  | UUUAGUUGCACCCUUAUUCag | 93  |
| EIF2AK1 | NM_014413    | GCUCAUUGAGACUACAUCAtt  | UGAUGUAGUCUCAUUGAGCta | 74  |
| EIF2AK1 | NM_014413    | CGAAGAAUCUCCGAAGAAAtt  | UUCUUCGGAAGAUUCUUCGgt | 83  |
| EIF2AK3 | NM_004836    | CGCGGCAGGUCAUUAGUAAtt  | UUACUAAUGACCUGCCGCGcg | 68  |
| EIF2AK3 | NM_004836    | GUGACGAAUUGGAACAAGAtt  | UCUUGUUCCAUUUCGUCACta | 193 |
| EIF2AK3 | NM_004836    | CAACAAGAAUAUCCGCAAAtt  | UUUGCGGAUAUUCUUGUUGta | 311 |
| EIF2AK4 | NM_001013703 | GCACCGUCAAGAUUACGGAtt  | UCCGUAAUCUUGACGGUGCct | 151 |

|         |              |                        |                        |     |
|---------|--------------|------------------------|------------------------|-----|
| EIF2AK4 | NM_001013703 | GGAUCCCUUUUGCAAGAUAtt  | UAUCUUGCAAAGGGAUCCgc   | 107 |
| EIF2AK4 | NM_001013703 | GGUCCAAGGAAGCACCAAAtt  | UUUGGUGCUUCCUUGGACCtc  | 56  |
| EPHA1   | NM_005232    | GGUACCAGAUGGUUCUAGAtt  | UCUAGAACCAUCUGGUACCgt  | 171 |
| EPHA1   | NM_005232    | CUACCUCAGUAAUCACAAUtt  | AUUGUGAUUACUGAGGUAGtt  | 113 |
| EPHA1   | NM_005232    | CCUCAGUAAUCACAAUUAtt   | AUAAUUGUGAUUACUGAGGta  | 85  |
| EPHA10  | NM_001004338 | GCAGGAUAAUAAAAACUUGtt  | CAAGUUUUUUAUUAUCCUGCac | 61  |
| EPHA10  | NM_001004338 | GCAUCUUCGUGGAACUGCAtt  | UGCAGUUCCACGAAGAUGCgc  | 60  |
| EPHA10  | NM_001004338 | CCAAGGAACUGGAUGCGAAtt  | UUCGCAUCCAGUUCUUGGcg   | 133 |
| EPHA2   | NM_004431    | UGAUGAUCAUCACUGAGUAtt  | UACUCAGUGAUGAUCAUCAtg  | 147 |
| EPHA2   | NM_004431    | GGAAGUACGAGGUCACUUAtt  | UAAGUGACCUCGUACUCCac   | 135 |
| EPHA2   | NM_004431    | GUUUCUUAUUGAGCUCAtt    | UUGAGCUCAAUGAAGAUACgc  | 264 |
| EPHA3   | NM_182644    | GGAUGUACUGCAGUACAGAtt  | UCUGUACUGCAGUACAUCctt  | 214 |
| EPHA3   | NM_182644    | CACCUGUCCUGACGAUUAAtt  | UUAUUCGUCAGGACAGGUGat  | 92  |
| EPHA3   | NM_182644    | CGAGGUCAAUACUAUGAAtt   | UUCAUAGUAUUUGACCUCGta  | 95  |
| EPHA4   | NM_004438    | GAACUUGGGUGGAUAGCAAtt  | UUGCUAUCCACCCAAGUUCtc  | 197 |
| EPHA4   | NM_004438    | CGAAGAUCCCAACCAAGCAtt  | UGCUUGGUUGGGAUCUUCGta  | 131 |
| EPHA4   | NM_004438    | GUACGAAGAUCCCAACCAAtt  | UUGGUUGGGAUCUUCGUACgt  | 111 |
| EPHA5   | NM_004439    | CAUCCUGCAGAGUAUCUAAtt  | UUAGAUACUCUGCAGGAUGca  | 235 |
| EPHA5   | NM_004439    | CAAUCAAGCUGUCCACGAAtt  | UUCGUGGACAGCUUGAUUGgg  | 122 |
| EPHA5   | NM_004439    | CAUUGAUCCACAUACCUAUtt  | AUAGGUAUGUGGAUCAAUgta  | 80  |
| EPHA6   | NM_173655    | GGUCAAUAGCAACUUAGUAtt  | UACUAAGUUGCUAUUGACCag  | 128 |
| EPHA6   | NM_173655    | GACCAGUAAUGAUUUGUGGUtt | ACCACAAUCAUACUGGUctg   | 142 |
| EPHA6   | NM_173655    | UCCCGGAAUUAAAACUUAtt   | UAAGUUUUAAUUCGCGGAag   | 96  |
| EPHA7   | NM_004440    | GAUGGGCAAUUUACAGUCAtt  | UGACUGUAAAUUGCCCAUCat  | 176 |
| EPHA7   | NM_004440    | GGAACGGACCUACUCAACAtt  | UGUUGAGUAGGUCCGUUCct   | 88  |
| EPHA7   | NM_004440    | CAGCUAAUGUUGGAUUGUUtt  | AACAAUCCAACAUUAGCUGgt  | 223 |
| EPHA8   | NM_001006943 | CAGUGUGAAUGGGACAUCAtt  | UGAUGUCCCAUUCACACUGga  | 147 |
| EPHA8   | NM_001006943 | GGACAUCAGUGACUCUGGAtt  | UCCAGAGUCACUGAUGUCCca  | 92  |
| EPHA8   | NM_001006943 | CCUCAAAAUCGACACCAUtt   | AAUGGUGUCGAUUUUGAGGaa  | 156 |
| EPHB1   | NM_004441    | GUCCGUGUCUUCUUCAAAAtt  | UUUUGAAGAAGACACGGACag  | 223 |
| EPHB1   | NM_004441    | CGACCAUCCUAACAUCAUtt   | AAUGAUGUUAGGAUGGUCGaa  | 152 |

|       |              |                        |                        |     |
|-------|--------------|------------------------|------------------------|-----|
| EPHB1 | NM_004441    | GAAACGGGCUUAUAGCAAAtt  | UUUGCUAUAAGCCCGUUUCct  | 157 |
| EPHB2 | NM_017449    | GCGUGAUCCUGGACUAUGAtt  | UCAUAGUCCAGGAUCACGCca  | 116 |
| EPHB2 | NM_017449    | ACAUCGAUCCUUUCACCUAtt  | UAGGUGAAAGGAUCGAUGUag  | 127 |
| EPHB2 | NM_017449    | AGAUGAUCCGCAAUCCCAAtt  | UUGGGAUUGCGGAUCAUCUtg  | 157 |
| EPHB3 | NM_004443    | GGUCUACGUGGAGCUCAAtt   | UUGAGCUCCACGUAGACCCgc  | 253 |
| EPHB3 | NM_004443    | GAAUGAAGGUUUUAUUGAtt   | UCAAUUAAAACCUUCAUUCca  | 157 |
| EPHB3 | NM_004443    | CGAUCCUACCUACACCAGUtt  | ACUGGUGUAGGUAGGAUCGga  | 176 |
| EPHB4 | NM_004444    | GGACAAACACGGACAGUAUtt  | AUACUGUCCGUGUUUGUCGga  | 168 |
| EPHB4 | NM_004444    | GCAGAGCAAUGGGAGAGAAtt  | UUCUCUCCCAUUGCUCUGCtt  | 88  |
| EPHB4 | NM_004444    | GCUGCUGCCUUCAUAUUGAtt  | UCAAUUAUGAAGGCAGCAGCtg | 189 |
| EPHB6 | NM_004445    | CCUGGAUUACAUCUACUAtt   | UAAGUAGAUGUAAUCCAGGag  | 190 |
| EPHB6 | NM_004445    | ACACGUACCCUACAUCUAtt   | UAAGAUGUAGGGUACGUGUgc  | 127 |
| EPHB6 | NM_004445    | GGACAAUUGGUUGCAGACAtt  | UGUCUGCAACCAAUUGUCctg  | 172 |
| ERBB2 | NM_001005862 | GCUCAUCGCUCACAACCAAtt  | UUGGUUGUGAGCGAUGAGCac  | 219 |
| ERBB2 | NM_001005862 | GGAGACCCGCUGAACAAUAtt  | UAUUGUUCAGCGGGUCUCat   | 102 |
| ERBB2 | NM_001005862 | GUUGGAUGAUUGACUCUGAtt  | UCAGAGUCAAUCAUCCAACat  | 53  |
| ERBB3 | NM_001005915 | CAGUGGAUUCGAGAAGUGAtt  | UCACUUCUCGAAUCCACUGca  | 93  |
| ERBB3 | NM_001005915 | UCGUCAUGUUGAACUAUAAAtt | UUAUAGUUCAACAUGACGAag  | 111 |
| ERBB3 | NM_001005915 | GAAUGAAUUCUCUACUCUAtt  | UAGAGUAGAGAAUUCAUUCat  | 184 |
| ERBB4 | NM_005235    | CCUUUUUGUUUCUCGGAGAtt  | UCUCCGAGAAACAAAAGGGtt  | 161 |
| ERBB4 | NM_005235    | CCUUUACAAUGCAAUUGAAAtt | UUCAAUUGCAUUGUAAGGGtc  | 84  |
| ERBB4 | NM_005235    | CCCGUAAUGUCUUAGUGAAAtt | UUCACUAAGACAUUACGGGct  | 105 |
| ERN1  | NM_001433    | GAAACUCCUUUUACCAUCtt   | GAUGGUAAAAGGAAGUUUCgt  | 118 |
| ERN1  | NM_001433    | CCUGCGCUAUCUGACCUUCtt  | GAAGGUCAGAUAGCGCAGGgt  | 142 |
| ERN1  | NM_001433    | CAGGACAUCUGGUAUGUUAtt  | UAACAUACCAGAUGUCCUGct  | 160 |
| ERN2  | NM_033266    | GAAGGACCAAUGUACGUCAtt  | UGACGUACAUUGGUCCUUCga  | 190 |
| ERN2  | NM_033266    | GGAUGAUCCCGUCAUCGAAAtt | UUCGAUGACGGGAUCAUCCct  | 248 |
| ERN2  | NM_033266    | CAAUGUACGUCACAGAAAUtt  | AUUUCUGUGACGUACAUUGgt  | 324 |
| ETNK1 | NM_018638    | GGAAUCACAAAUAACUUAAtt  | UAAGUUUAUUUGUGAUUCCat  | 162 |
| ETNK1 | NM_018638    | CAAUAAAGACUGAGUUUAUAtt | UAAUAACUCAGUCUUUAUUGcc | 308 |
| ETNK1 | NM_018638    | GCACCACAACUCUACUGUAtt  | UACAGUAGAGUUGUGGUGCac  | 115 |

|          |              |                        |                        |     |
|----------|--------------|------------------------|------------------------|-----|
| ETNK2    | NM_018208    | GCGUGAAUGAGGUGGAUUAtt  | UAAUCCACCUCAUUCACGCct  | 179 |
| ETNK2    | NM_018208    | CCAUUUCAAUGAGUUUGCAtt  | UGCAAACUCAUUGAAAUGGtt  | 590 |
| ETNK2    | NM_018208    | GGCUCUACGUGCAAGUCAAtt  | UUGACUUGCACGUAGAGCCtt  | 92  |
| FASTK    | NM_033015    | GUACAGUCACAAGGACAUAAtt | UAUGUCCUUGUGACUGUACtt  | 61  |
| FASTK    | NM_033015    | ACAAGGACAUAGUAGCUGAtt  | UCAGCUACUAUGUCCUUGUga  | 198 |
| FASTK    | NM_033015    | GCAGCAAGGUGGUACAGAAtt  | UUCUGUACCACCUUGCUGCtg  | 184 |
| FER      | NM_005246    | CACGAUCAGUUACAUCUAUtt  | AUAGAUGU AACUGAUCGUGca | 141 |
| FER      | NM_005246    | GAAUU AUGUCAGCAACGUAtt | UACGUUGCUGACAUA AUUCat | 108 |
| FER      | NM_005246    | GAACAACGGCUGCUAAAGAtt  | UCUUUAGCAGCCGUUGUUCtg  | 155 |
| FES      | NM_002005    | CCACGCUGGAGA UCCUUAAtt | UUAAGGAUCUCCAGCGUGGgt  | 262 |
| FES      | NM_002005    | CCUCAGCAAUCAGCAGACAtt  | UGUCUGCUGAUUGCUGAGGtt  | 110 |
| FES      | NM_002005    | AGUGGGUGCUGAACCAUGAtt  | UCAUGGUUCAGCACCCACUtg  | 330 |
| FGFR1    | NM_023106    | GAGGCUACAAGGUCCGUUAtt  | UAACGGACCUUGUAGCCUCca  | 174 |
| FGFR1    | NM_023106    | GCAUUGUGGAGAAUGAGUAtt  | UACUCAUUCUCCACAAUGCag  | 91  |
| FGFR1    | NM_023106    | ACACUGCGCUGGUUGAAAAtt  | UUUUCAACCAGCGCAGUGUgg  | 203 |
| FGFR2    | NM_022970    | GGAGUACUCCUAUGACAUAUtt | AAUGUCAUAGGAGUACUCCat  | 173 |
| FGFR2    | NM_022970    | GUAGGACUGUAGACAGUGAtt  | UCACUGUCUACAGUCCUActg  | 126 |
| FGFR2    | NM_022970    | GAACAGUAUUCACCUAGUUtt  | AACUAGGUGAAUACUGUUCga  | 251 |
| FGFR3    | NM_000142    | CCGUAGCCGUGAAGAUGCUtt  | AGCAUCUUCACGGCUACGGtg  | 274 |
| FGFR3    | NM_000142    | CCUGCGUCGUGGAGAACAAtt  | UUGUUCUCCACGACGCAGGtg  | 137 |
| FGFR3    | NM_000142    | AGGUGUACAGUGACGCACAtt  | UGUGCGUCACUGUACACCUtg  | 137 |
| FGFR4    | NM_002011    | CAUUGACUACUAUAAGAAAAtt | UUUCUUAUAGUAGUCAAUtg   | 178 |
| FGFR4    | NM_002011    | CCACCACAUUGACUACUAUtt  | AUAGUAGUCAAUUGGGUGGac  | 301 |
| FGFR4    | NM_002011    | ACACCUGCCUGGUAGAGAAtt  | UUCUCUACCAGGCAGGUGUat  | 172 |
| FGFRL1   | NM_001004358 | AGGACGAUGCGGGCAUGUAAtt | UACAUGCCCGCAUCGUCCUgg  | 179 |
| FGFRL1   | NM_001004358 | AAGAAGAAGUGGACACUGAtt  | UCAGUGUCCACUUCUUCUcc   | 183 |
| FGFRL1   | NM_001004358 | CGACGGCUCCUACCUCAAUtt  | AUUGAGGUAGGAGCCGUCggg  | 74  |
| FGR      | NM_001042747 | GCAUUACAAGA UCCGCAAAtt | UUUGCGGAUCUUGUAAUGCtt  | 191 |
| FGR      | NM_001042747 | CCCUGUUCAUUGCCCUGUAAtt | UACAGGGCAAUGAACAGGGtc  | 121 |
| FGR      | NM_001042747 | GCAUCCUCAUUUGCCCACAtt  | UGUGGGCAAUGAGGAUGCag   | 226 |
| FLJ10986 | NM_018291    | ACCUGGAUCUGAUUAAGAAAtt | UUCUUAUUCAGA UCCAGGUga | 129 |

|          |           |                        |                        |     |
|----------|-----------|------------------------|------------------------|-----|
| FLJ10986 | NM_018291 | GAUUGAAACUGUCUCAGGAtt  | UCCUGAGACAGUUUCAAUcCg  | 112 |
| FLJ10986 | NM_018291 | GCAGGGCACUCAAUcAGUAtt  | UACUGAUUGAGUGCCCUGCtg  | 239 |
| FLJ25006 | NM_144610 | ACAGAUAACCAUCCCUUUt    | AAAGGGAUGGUUGAUCUGUcg  | 68  |
| FLJ25006 | NM_144610 | AGAAUAUUCUUCUAGAUGAtt  | UCAUCUAGAAGAAUAUUCUcc  | 77  |
| FLJ25006 | NM_144610 | CUACCAGAGUUUCCCAUUAtt  | UAAUGGGAAACUCUGGUAGaa  | 243 |
| FLT1     | NM_002019 | GGUGAGUAAGGAAAGCGAAtt  | UUCGCUUUCUUACUCACCat   | 165 |
| FLT1     | NM_002019 | CCCUGAUGGAAAACGCAUAtt  | UAUGCGUUUUCCAUCAGGgat  | 129 |
| FLT1     | NM_002019 | CGCCGGAAGUUGUAUGGUUt   | AACCAUACAACUCCGGCGag   | 315 |
| FLT3     | NM_004119 | CAACUAUCUAAGAAGUAAAAtt | UUUACUUCUAGAUAGUUGag   | 154 |
| FLT3     | NM_004119 | GGCUGUUCACAAUAGAUCUtt  | AGAUCUAUUGUGAACAGCctg  | 131 |
| FLT3     | NM_004119 | GGACUAUUACAAUACAAGAtt  | UCUUGAUUUUGAAUAGUCcCa  | 173 |
| FLT4     | NM_002020 | CCAGCAUCCUGACCAUCCAtt  | UGGAUGGUCAGGAUGCUGGag  | 119 |
| FLT4     | NM_002020 | CGAGGUCAUUGUGCAUGAAtt  | UUCAUGCACAAUGACCUCGgt  | 78  |
| FLT4     | NM_002020 | GCUUCACCAUCGAAUCCAAtt  | UUGGAUUCGAUGGUGAAGCcg  | 86  |
| FN3K     | NM_022158 | CAGUGUUCGUCAAAGUCAAtt  | UUGACUUUGACGAACACUGgg  | 194 |
| FN3K     | NM_022158 | CAUCAAACUUGGAGAGCAtt   | UGCUCUCCAAGUUUUGAUGct  | 292 |
| FN3K     | NM_022158 | CCGCCUUUGUGAUGGAGCAtt  | UGCUCUCCAAGUUUUGAUGct  | 260 |
| FN3KRP   | NM_024619 | ACAAGAAGCUUGGAGAGAUtt  | AUCUCUCCAAGCUUCUUGUta  | 81  |
| FN3KRP   | NM_024619 | CUACGACACGGAUCAAGGAtt  | UCCUUGAUCCGUGUCGUAGct  | 146 |
| FN3KRP   | NM_024619 | GAGUGUUCGUGAAAGUGAAtt  | UUCACUUUCACGAACACUCgt  | 49  |
| FRAP1    | NM_004958 | GCUCGUAGUUGGGAUAACAtt  | UGUUUAUCCCAACUACGAGCag | 166 |
| FRAP1    | NM_004958 | CAUUCGCAUUCAGUCCAUAtt  | UAUGGACUGAAUGCGAAUGat  | 236 |
| FRAP1    | NM_004958 | GGAGCCUUGUUGAUCCUUAtt  | UAAGGAUCAACAAGGCUCcat  | 77  |
| FRK      | NM_002031 | GCAACUACAAGGCUAUAUUt   | AAUAUAGCCUUGUAGUUGCtg  | 189 |
| FRK      | NM_002031 | CCAUUUGAUUUGUCGUAUAtt  | UAUACGACAAAUCAAAUGGag  | 98  |
| FRK      | NM_002031 | GCAGACAAGUCAACCGUGAtt  | UCACGGUUGACUUGUCUGCct  | 137 |
| FUK      | NM_145059 | GACUUACACUCAACCCUCAtt  | UGAGGGUUGAGUGUAAGUCta  | 77  |
| FUK      | NM_145059 | GCACCUACCUAGGCUUGGAtt  | UCCAAGCCUAGGUAGGUGCag  | 118 |
| FUK      | NM_145059 | GGCCUACGCUCAGAAUCAUtt  | AUGAUUCUGAGCGUAGGCCgg  | 50  |
| FYN      | NM_153048 | GCUUGUACAACAUAUCUCAtt  | UGAGUAAUGUUGUACAAGCtg  | 136 |
| FYN      | NM_153048 | GGAUGAUUAUGAAAGGAGAtt  | UCUCCUUUCAUAUCAUCCaa   | 112 |

|        |              |                        |                        |     |
|--------|--------------|------------------------|------------------------|-----|
| FYN    | NM_153048    | GAUUGAUAGAAGACAAUGAtt  | UCAUUGUCUUCUAUCAAUcgg  | 82  |
| GAK    | XM_001127411 | GUCCGUCGCUAAUUAUGCAtt  | UGCAUAAUUAGCGACGGACTg  | 297 |
| GAK    | XM_001127411 | CACCAGAAAUCAUAGACUUt   | AAGUCUAUGAUUUCUGGUGtt  | 178 |
| GAK    | XM_001127411 | CGAGGAAUACAACACCAAUtt  | AUUGGUGUUGUAUUCUCGtg   | 157 |
| GALK1  | NM_000154    | GACCAGUUCAUCUCACUUAAtt | UAAGUGAGAUGAACUGGUCca  | 125 |
| GALK1  | NM_000154    | UGCUCaucACCAACUCUAAtt  | UUAGAGUUGGUGAUGAGCAcg  | 97  |
| GALK1  | NM_000154    | UCAAGGGAGUGAUUCAGUAAtt | UACUGAAUCACUCCCUUGAca  | 341 |
| GALK2  | NM_002044    | GGAGAGUUGAUGAACCAGAtt  | UCUGGUUCAUCAACUCUCc    | 152 |
| GALK2  | NM_002044    | GGAACACUUUGGUCUUAAGUtt | ACUAAGACCAAAGUGUUCctg  | 131 |
| GALK2  | NM_002044    | CGAGUGCUCAGUUUAAGAtt   | UCUUAACUGGAGCACUCGcg   | 208 |
| GCK    | NM_033507    | GGCACGAAGACAUCGAUAAtt  | UUAUCGAUGUCUUCGUGCctc  | 183 |
| GCK    | NM_033507    | GCAUGUGCGUCAAUACCGAtt  | UCGGUAUUGACGCACAUGCgg  | 146 |
| GCK    | NM_033507    | GGUCAGCAGCUGUAUGAGAtt  | UCUCAUACAGCUGCUGACCgg  | 293 |
| GCKR   | NM_001486    | CCUGUUUUUAGCAGCCCAtt   | UGGGCUGCUAAUAACAGGGtt  | 176 |
| GCKR   | NM_001486    | GGCAUUGCAGCAUCUCAAAAtt | UUUGAGAUGCUGCAAUGCCct  | 131 |
| GCKR   | NM_001486    | GAACAUUGUUCGACUGCUAtt  | UAGCAGUCGAACAAUGUUCtc  | 304 |
| GK     | NM_203391    | GAGUCUUAGUAAAAGAAUUt   | AAUUCUUUUACUAAGACUCtc  | 167 |
| GK     | NM_203391    | ACUUAGUCAUCAUCAAGUAtt  | UACUUGAUGAUGACUAAGUag  | 148 |
| GK     | NM_203391    | CAUCAUCAAGUAGAAUAAtt   | UUUUUCUACUUGAUGAUGac   | 114 |
| GK2    | NM_033214    | GGAAGAAAGCCGUAAUGAAtt  | UUCAUUACGGCUUUCUUCcat  | 133 |
| GK2    | NM_033214    | CAAUAAAUGUCAUAUUGCUtt  | AGCAAUAUGACAUUUUAUUGgt | 136 |
| GK2    | NM_033214    | GUAACUUCGUCAAGUCUAAtt  | UUAGACUUGACGAAGUUACTa  | 179 |
| GK5    | NM_001039547 | CGAGCAAUAUUGGAGUCAAtt  | UUGACUCCAAUAUUGCUCGta  | 124 |
| GK5    | NM_001039547 | GGAAAUAGCCUUAACAGAtt   | UCUGUUGAAGGCUAUUUCcag  | 98  |
| GK5    | NM_001039547 | GGGUAGAAAUUGAUCCUGAtt  | UCAGGAUCAAUUUCUACCCag  | 224 |
| GLYCTK | NM_145262    | GGAUGACAGGUACCAAUGUtt  | ACAUUGGUACCUUGUCAUCCct | 105 |
| GLYCTK | NM_145262    | GCCCACAAUGACUCACAUAtt  | UAUGUGAGUCAUUGUGGGCta  | 137 |
| GLYCTK | NM_145262    | ACAUAGCCGUGUCCAGGUAtt  | UACCUUGACACGGCUAUGUgg  | 98  |
| GRIP2  | XM_940982    | GAACAUUGGUGACUAUAUUt   | AAUAUAGUCACCAAUGUUCag  | 104 |
| GRIP2  | XM_940982    | GAGAGACCGUCACACUGAAtt  | UUCAGUGUGACGGUCUCUCca  | 81  |
| GRIP2  | XM_940982    | GCACCGACAAGGAUGGAAAtt  | UUUCAUCCUUGUCGGUGCca   | 525 |

|       |              |                        |                        |     |
|-------|--------------|------------------------|------------------------|-----|
| GRK1  | NM_002929    | GCAAUGUCCGGAUCUCUGAtt  | UCAGAGAUCCGGACAUUGCcg  | 280 |
| GRK1  | NM_002929    | CCAAAACUGUCUACGCAAAtt  | UUUGCGUAGACAGUUUUGGag  | 80  |
| GRK1  | NM_002929    | CUAUGCGUUUGAAACCAAAtt  | UUUGGUUUCAAACGCAUAGgc  | 98  |
| GRK4  | NM_182982    | GGACUGUCAAUUUAGAUAtt   | UAUCUAAGAUUGACAGUCCac  | 123 |
| GRK4  | NM_182982    | GAGUUGGAACAGUCGGCUAtt  | UAGCCGACUGUCCAACUCtt   | 137 |
| GRK4  | NM_182982    | GAAUCAAGAAUGAUACCGAtt  | UCGGUAUCAUUCUUGAUUCtt  | 327 |
| GRK5  | NM_005308    | CGUCUACCGAGAUCUGAAAtt  | UUUCAGAUCUCGGUAGACGgt  | 94  |
| GRK5  | NM_005308    | GAAGGACCAUAGACAGAGAtt  | UCUCUGUCUAUGGUCCUUCgg  | 34  |
| GRK5  | NM_005308    | GGCAACCGGUGACCAAAAAtt  | UUUUUGGUCACCGGUUGCCtt  | 67  |
| GRK6  | NM_001004106 | GGACUUCUACCAGAAGUUUtt  | AAACUUCUGGUAGAAGUCctg  | 88  |
| GRK6  | NM_001004106 | GAGAAAAAGCGGAUCAAGAtt  | UCUUGAUCCGCUUUUUCUCta  | 138 |
| GRK6  | NM_001004106 | GCAUCUACUUCAACCGUUUtt  | AAACGGUUGAAGUAGAUGCtg  | 79  |
| GRK7  | NM_139209    | GAUCCUAAUGGAAAAGGUAtt  | UACCUUUUCCAUUAGGAUCtc  | 157 |
| GRK7  | NM_139209    | GCAACUGCAGGUUAUCUGAtt  | UCAGAUAAACCUGCAGUUGCcg | 158 |
| GRK7  | NM_139209    | CGAACACCAUUCAAAGAUUtt  | AAUCUUUGAAUGGUGUUCGtc  | 77  |
| GSG2  | NM_031965    | GACAAGAUGCUGAAACAAAAtt | UUUGUUUCAGCAUCUUGUCtg  | 95  |
| GSG2  | NM_031965    | GUAAGCUAAAUGUAUCUUAtt  | UAAGAUACAUUUAGCUUACTt  | 329 |
| GSG2  | NM_031965    | CCAGGACCUGACUCCUUUAtt  | UAAAGGAGUCAGGUCCUGGgt  | 37  |
| GSK3A | NM_019884    | GAAAGACGAGCUUUACCUAtt  | UAGGUAAAGCUCGUCUUUCtt  | 106 |
| GSK3A | NM_019884    | ACACCAACCCGGGAACAAAAtt | UUUGUUCCCGGGUUGGUGUtc  | 164 |
| GSK3A | NM_019884    | GGCUUACACGGACAUCAAAAtt | UUUGAUGUCCGUGUAAGCCac  | 158 |
| GSK3B | NM_002093    | CUCAAGAACUGUCAAGUAAtt  | UUACUUGACAGUUCUUGAGtg  | 180 |
| GSK3B | NM_002093    | CGAGAGCUCCAGAUCAUGAtt  | UCAUGAUCUGGAGCUCUCgat  | 197 |
| GSK3B | NM_002093    | GCUAGAUCACUGUAACAUAAtt | UAUGUUACAGUGAUCUAGCtt  | 160 |
| GUK1  | NM_000858    | GGCUUCAGCGUGUCCCAUAtt  | UAUGGGACACGCUGAAGCCaa  | 221 |
| GUK1  | NM_000858    | GAGGCGCUCUCUGAGGAAAtt  | UUUCCUCAGAGAGCGCCUCct  | 30  |
| GUK1  | NM_000858    | GGCCAUGAACCGCAUCUGUtt  | ACAGAUGCAGGUUCAUGCCtg  | 190 |
| HCK   | NM_002110    | UGAUGGAGAUCGUCACCUAtt  | UAGGUGACGAUCUCCAUCAgc  | 134 |
| HCK   | NM_002110    | GAGAUACCGUGAAACAUAUAtt | UAAUGUUUCACGGUAUCUCcc  | 237 |
| HCK   | NM_002110    | GGGAUAGCGAGACCACUAAtt  | UUAGUGGUCUCGCUAUCCGgg  | 204 |
| HGS   | NM_004712    | CGUCUUUCCAGAAUUCAAAAtt | UUUGAAUUCUGGAAAGACGtg  | 95  |



|       |              |                       |                        |     |
|-------|--------------|-----------------------|------------------------|-----|
| HGS   | NM_004712    | UGGAAUCUGUGGUAAGAAtt  | UUCUUUACCACAGAUUCCAAtg | 257 |
| HGS   | NM_004712    | CACGGUAUCUCAACCGGAAtt | UUCGGUUGAGAUACCGUGcg   | 491 |
| HIPK1 | NM_198269    | CAUUGAUCUGUUAAAGAAAtt | UUUCUUUAACAGAUCAAUGta  | 94  |
| HIPK1 | NM_198269    | GAUUUGCACUCAGACAGAUtt | AUCUGUCUGAGUGCAAUctg   | 66  |
| HIPK1 | NM_198269    | GCUCAAUACAGUGCACAAUtt | AUUGUGCACUGUAUUGAGctg  | 44  |
| HIPK2 | NM_022740    | CCAUGACCUUUAACAACCAtt | UGGUUGUUAAAGGUCAUGGtc  | 191 |
| HIPK2 | NM_022740    | GAGAAUCACUCCAAUCGAAtt | UUCGAUUGGAGUGAUUCUCtt  | 160 |
| HIPK2 | NM_022740    | CGGACUCACCAUAUCCUUUtt | AAAGGAUAUGGUGAGUCCGtg  | 134 |
| HIPK3 | NM_001048200 | CGUGUACCUCAAGACCUAUtt | AUAGGUCUUGAGGUACACGga  | 93  |
| HIPK3 | NM_001048200 | CCGUGUACCUCAAGACCUAtt | UAGGUCUUGAGGUACACGgag  | 76  |
| HIPK3 | NM_001048200 | CGAUGUGGAUUGAAGCGCAtt | UGCVCUUCAAUCCACAUCGct  | 125 |
| HIPK4 | NM_144685    | CUCAAGUCGUUGGACCAGAtt | UCUGGUCCAACGACUUGAGca  | 162 |
| HIPK4 | NM_144685    | AGUUCUACCUGGUCUUUGAtt | UCAAGACCAGGUAGAACUtg   | 110 |
| HIPK4 | NM_144685    | ACAUGACCAUGGAAGCUGAtt | UCAGCUUCCAUGGUCAUGUtg  | 92  |
| HK1   | NM_033497    | CAUCCACACUUCUCCAGAAtt | UUCUGGAGAAGUGUGGAUGaa  | 104 |
| HK1   | NM_033497    | CGAUGAAACUCUCAUAGAUtt | AUCUAUGAGAGUUUCAUCGga  | 167 |
| HK1   | NM_033497    | GAUCGAGAGUGACCGAUUAtt | UAAUCGGUCACUCUCGAUCtg  | 211 |
| HK2   | NM_000189    | GGAUGAAGGUAGAAAUGGAtt | UCCAUUUCUACCUUCAUCctc  | 93  |
| HK2   | NM_000189    | UGGGUGAGAUUGUCCGUAAtt | UUACGGACAAUCUCACCCAgg  | 111 |
| HK2   | NM_000189    | CAGAGGUUCGAGAAAUGAtt  | UCAUUUUCUCGAACCUCUGct  | 142 |
| HK3   | NM_002115    | ACCAUACCCUGGACCAUGAtt | UCAUGGUCCAGGUAUGGUcg   | 115 |
| HK3   | NM_002115    | AGAUGAUCGGAGGCCUGUAtt | UACAGGCCUCCGAUCAUCUtc  | 159 |
| HK3   | NM_002115    | GGAAUGCGAUGUCUCCUUAtt | UAAGGAGACAUCGCAUUCgg   | 152 |
| HKDC1 | NM_025130    | GGAGCUCUUUGAUCACAUUtt | AAUGUGAUCAAAGAGCUCctc  | 119 |
| HKDC1 | NM_025130    | GUGCGAAUGUACAACAAGAtt | UCUUGUUGUACAUUCGCActg  | 148 |
| HKDC1 | NM_025130    | CCCUCACUUUUCUAGAAUAtt | UAUUCUAGAAAAGUGAGGtg   | 259 |
| HUNK  | NM_014586    | GCUCCUUGAUUUUUAGAAtt  | UUCUAAAAUAUCAAGGAGctg  | 162 |
| HUNK  | NM_014586    | GCCGCAAUAAUUUCCGCAAtt | UUGCGGAAAAUAUUGCGGCag  | 318 |
| HUNK  | NM_014586    | GGCUCUACCAGAUAGAAAAtt | UUUUCUAUCUGGUAGAGCCgg  | 250 |
| ICK   | NM_014920    | GGACUCGCAUUUAUUCACAtt | UGUGAAUAAAUGCGAGUCctt  | 129 |
| ICK   | NM_014920    | CAAUGUCAGUAAUCAGCAAtt | UUGCUGAUUACUGACAUUGtc  | 258 |

|        |              |                        |                        |     |
|--------|--------------|------------------------|------------------------|-----|
| ICK    | NM_014920    | CCCAAUAACUAAAAGACCUtt  | AGGUCUUUAAGUUAUUGGGta  | 108 |
| IGF1R  | NM_000875    | GCAUGGUAGCCGAAGAUUtt   | AAAUCUUCGGCUACCAUGCaa  | 88  |
| IGF1R  | NM_000875    | CCGAAGAUUUCACAGUCAAtt  | UUGACUGUGAAAUCUUCGGct  | 84  |
| IGF1R  | NM_000875    | GGAGUUCAAUUGUCACCAUtt  | AUGGUGACAAUUGAACUCctt  | 151 |
| IGSF22 | NM_173588    | GAAGAGGGAUGACAAGUAUtt  | AUACUUGUCAUCCCUCUUCag  | 165 |
| IGSF22 | NM_173588    | CCUCUGUAUUCAUCGCAGAtt  | UCUGCGAUGAAUACAGAGGct  | 128 |
| IGSF22 | NM_173588    | CGCACACGCUUAAGAUUAAtt  | UUAUUCUUAAGCGUGUGCGtc  | 130 |
| IHPK1  | NM_153273    | GCAAUGCCCUCUAUCAAUAtt  | UAUUGAUAGAGGGCAUUGCgg  | 95  |
| IHPK1  | NM_153273    | GGCAUUACCUCUGCAGGAAtt  | UUCCUGCAGAGGUAAUUGCct  | 191 |
| IHPK1  | NM_153273    | AGACAGAGGCUACGUGUUtt   | AAACACGUAGCCUCUGUCUgg  | 425 |
| IHPK2  | NM_001005909 | GAACAUCAGUUCUACGAGAtt  | UCUCGUAGAACUGAUGUUCcc  | 217 |
| IHPK2  | NM_001005909 | GCGUGCUCCGCUUCAAUAtt   | UCAUUGAAGCGGAGCACGcat  | 261 |
| IHPK2  | NM_001005909 | GCUUCAAUAGAGACAACCCUtt | AGGGUUGUCUCAUUGAAGCgg  | 171 |
| IHPK3  | NM_054111    | UGACUUUGCUCUAUACCACAtt | UGUGGUAUGAGCAAAGUCAat  | 66  |
| IHPK3  | NM_054111    | CUCUAUCAGUUCUACAUAAtt  | UAUGUAGGAACUGAUAGAGgg  | 83  |
| IHPK3  | NM_054111    | GCAGGUUUUAUCAACAGAUtt  | AUCUGUUUGAUAAACCUgcat  | 36  |
| IKBKB  | NM_001556    | GGGCAGUCUUUGCACAUCAAtt | UGAUGUGCAAAGACUGCCctg  | 135 |
| IKBKB  | NM_001556    | GGACAUUGUUGUUAGCGAAtt  | UUCGCUAACAACAUAUGUCCac | 166 |
| IKBKB  | NM_001556    | GACUUGAAUGGAACGGUGAtt  | UCACCGUCCAUAUCAAGUctt  | 111 |
| IKBKE  | NM_014002    | CGACACCAGGAGUACCUCUtt  | AGAGGUACUCCUGGUGUCGgg  | 66  |
| IKBKE  | NM_014002    | CAGUGCUGUUUGGACAAGAtt  | UCUUGUCCAACAGCACUGaa   | 135 |
| IKBKE  | NM_014002    | AGCUGGAUAAGGUGAAUUtt   | AAAUUCACCUUAUCCAGCUtg  | 536 |
| IKBKG  | NM_003639    | AAACAGGAGGUGAUCGAUAtt  | UAUCGAUACCUCUGUUUgg    | 65  |
| IKBKG  | NM_003639    | GGAUCGAGGACAUGAGGAAtt  | UUCCUCAUGUCCUCGAUCctg  | 120 |
| IKBKG  | NM_003639    | GAUUGUGAUGGAGACCGUtt   | AACGGUCUCCAUCACAAUctt  | 133 |
| ILK    | NM_004517    | GCCGUAGUGUAAUGAUUGAtt  | UCAUCAUUACACUACGGCta   | 210 |
| ILK    | NM_004517    | CGACCCAAAUUUGACAUGAtt  | UCAUGUCAAAUUUGGGUCGct  | 98  |
| ILK    | NM_004517    | GAAUCACUCUGGAGAGCUAtt  | UAGCUCUCCAGAGUGAUUctc  | 84  |
| INSR   | NM_000208    | GAAUGACCAGAGACAUCUAtt  | UAGAUGUCUCUGGUCAUUCca  | 124 |
| INSR   | NM_000208    | GAACGAUGUUGGACUCAUAtt  | UAUGAGUCCAACAUCGUUCga  | 79  |
| INSR   | NM_000208    | CUACGUGACAGACUAUUUAtt  | UAAAUAGUCUGUCACGUAGaa  | 63  |

|          |              |                        |                        |     |
|----------|--------------|------------------------|------------------------|-----|
| INSRR    | NM_014215    | GCUUCAUCGUGUACUACAAtt  | UUGUAGUACACGAUGAAGCtg  | 213 |
| INSRR    | NM_014215    | GGAUGACUCGGGACGUGUAtt  | UACACGUCCCGAGUCAUCCcg  | 123 |
| INSRR    | NM_014215    | GGAAGCUUCUGUCAUGAAAtt  | UUUCAUGACAGAAGCUUCctt  | 139 |
| IPMK     | NM_152230    | CCAACGAUUUAUACCUAAAtt  | UUAGGUUAAAUCGUUUGGtg   | 102 |
| IPMK     | NM_152230    | CAGCUUAAUUUUUACGCAAtt  | UUGCGUAAAAUUAAAGCUGct  | 88  |
| IPMK     | NM_152230    | GCAUUACGGAAGAAGCUUAtt  | UAAGCUUCUUCGGUAAUGCtg  | 145 |
| IPPK     | NM_022755    | GCAGAUCAGCAAUACUGUtt   | ACAGUAAUUGCUGAUCUGCtt  | 137 |
| IPPK     | NM_022755    | GCAAGAUCGUCAACUAUUAtt  | UAAUAGUUGACGAUCUUGCcg  | 85  |
| IPPK     | NM_022755    | CCUUCCUAAUUUAACCAGAtt  | UCUGGUUAAAUUAGGAAGGca  | 139 |
| IQCH     | NM_001031715 | GAGUUUGAGCUGACGAAUAtt  | UAUUCGUCAGCUCAAACUCtg  | 120 |
| IQCH     | NM_001031715 | GGUUGGUUACUUUUCGAUAtt  | UAUCGAAAAGUAACCAACCac  | 257 |
| IQCH     | NM_001031715 | GAACUAUGCUAUACCAGAAAtt | UUCUGGUUAGCAUAGUUCct   | 170 |
| IRAK1    | NM_001025242 | GGUUGUCCUUGAGUAAUAAtt  | UUAAUACUCAAGGACAACctg  | 70  |
| IRAK1    | NM_001025242 | CAAGUCAGGUUUAUGUAAtt   | UUACAUGAAACCUGACUUGct  | 203 |
| IRAK1    | NM_001025242 | GGAAAAGACAUGUAUCACAtt  | UGUGAUACAUGUCUUUUCct   | 137 |
| IRAK2    | NM_001570    | CAGGAUCAAUUCGAAAGAUtt  | AAUCUUUCGAUUGAUCCUGga  | 201 |
| IRAK2    | NM_001570    | CCUCCUACGUGAUACAGAtt   | UCUGUGAUCACGUAGGAGGcg  | 101 |
| IRAK2    | NM_001570    | AGUCCAGGAUCAAUUCGAAAtt | UUUCGAUUGAUCCUGGACUtg  | 152 |
| IRAK3    | NM_007199    | GAGAGAUUUUUGAGGUUAtt   | UAUACCUCAAAAUCUCUCct   | 84  |
| IRAK3    | NM_007199    | GUAGAGUAGUGUUAGAUGAtt  | UCAUCUAACACUACUCUACat  | 286 |
| IRAK3    | NM_007199    | GGAUGUUCGUCAUAUUGAAAtt | UUCAAUUUGACGAACAUCcag  | 348 |
| IRAK4    | NM_016123    | GGUUGACAUUACUACUGAAAtt | UUCAGUAGUAAUGUCAACCat  | 112 |
| IRAK4    | NM_016123    | GCCUAAUGGUUCAUUGCUAtt  | UAGCAAUGAACCAUUAGGCat  | 242 |
| IRAK4    | NM_016123    | GGUGUGGUUUUACUAGAAAtt  | UUUCUAGUAAAACCACACCaa  | 117 |
| ITGB1BP3 | NM_014446    | AUUCAGAACUCGCGUCGUGAtt | UCAGCAGCGAGUUCUGAAUgt  | 194 |
| ITGB1BP3 | NM_014446    | ACUGCUGCGUGAUCCAUCAtt  | UGAUGGAUCACGCAGCAGUtg  | 163 |
| ITGB1BP3 | NM_014446    | GCAUGUGAGCGUUUCCCUAtt  | UAGGGAAACGCUCACAUGCtg  | 353 |
| ITK      | NM_005546    | CCUAUGAGUGGUACAAUAAtt  | UUAAUUGUACCACUCAUAGGtt | 193 |
| ITK      | NM_005546    | GAGCCUUCAUGGUAAAGGAtt  | UCCCUUACCAUGAAGGCUCct  | 134 |
| ITK      | NM_005546    | GAGUGGUACAAUAAGAGUAtt  | UACUCUUAUUGUACCACUCat  | 144 |
| ITPK1    | NM_014216    | GAUUGAGGCCUACAUGGAAtt  | UUCCAUGUAGGCCUCAAUctt  | 119 |

|          |           |                        |                       |     |
|----------|-----------|------------------------|-----------------------|-----|
| ITPK1    | NM_014216 | GGAUGGAGGUUGUGCAGCUtt  | AGCUGCACAACCUCCAUCct  | 92  |
| ITPK1    | NM_014216 | GUUGUGCAGCUGAACCUUAtt  | UAAGGUUCAGCUGCACAACct | 95  |
| ITPKA    | NM_002220 | GAAGGACAUGUACAAGAAAtt  | UUUCUUGUACAUGUCCUUCcg | 188 |
| ITPKA    | NM_002220 | GGACUUACCUAGAGGAGGAtt  | UCCUCCUCUAGGUAAGUCctg | 94  |
| ITPKA    | NM_002220 | CGAGGACGUGGGUCAGAAAtt  | UUUCUGACCCACGUCCUCGcc | 96  |
| ITPKB    | NM_002221 | GGAUCGAGGGAAUCAAGAAAtt | UUCUUGAUUCCUCGAUCctg  | 220 |
| ITPKB    | NM_002221 | GAGAGUUCACUAAAGGAAAtt  | UUUCCUUUAGUGAACUCUCtg | 160 |
| ITPKB    | NM_002221 | CAUCCGCUUUUGUAAGGAUtt  | AUCCUUACAAAAGCGGAUGga | 200 |
| ITPKC    | NM_025194 | GGAUGGUCGGAUUCUGAAAtt  | UUUCAGAAUCCGACCAUCctc | 116 |
| ITPKC    | NM_025194 | GGACCUAUCUGGAAGAGGAtt  | UCCUCUUCAGAUAGGUCCtg  | 121 |
| ITPKC    | NM_025194 | GGAAGGACAUGUAUGAGAAAtt | UUCUCAUACAUGUCCUUCcg  | 240 |
| JAK1     | NM_002227 | CCAUCACCGUUGAUGACAAtt  | UUGUCAUCAACGGUGAUGGtg | 87  |
| JAK1     | NM_002227 | GUUUUAAGCUCAUCAUGGAtt  | UCCAUGAUGAGCUUAAUACca | 89  |
| JAK1     | NM_002227 | GGUGCUGUCUAGGCAAGAAtt  | UUCUUGCCUAGACAGCACCgt | 150 |
| JAK2     | NM_004972 | CAAAGAUCCAAGACUAUCAAtt | UGAUAGUCUUGGAUCUUUGct | 121 |
| JAK2     | NM_004972 | GGACUGUAUGUACUUCGAUtt  | AUCGAAGUACAUCAGUCCag  | 160 |
| JAK2     | NM_004972 | CCAGCGGAAUUUAUGCGUAtt  | UACGCAUAAAUCCGCUGGtg  | 139 |
| JAK3     | NM_000215 | CUAAGAAACUCCAAUUUUAtt  | UAAAAUUGGAGUUUCUAGca  | 234 |
| JAK3     | NM_000215 | GUUUCGUGGUGUCAGCUAUtt  | AUAGCUGACACCACGAUActt | 146 |
| JAK3     | NM_000215 | GGAGAUUCAGAUCCUCAAAAtt | UUUGAGGAUCUGAAUCUCcg  | 94  |
| KDR      | NM_002253 | CAUGUUCUCUAAUAGCACAtt  | UGUGCUAUUAGAGAACAUGgt | 164 |
| KDR      | NM_002253 | CCAUCGUCAUGGAUCCAGAtt  | UCUGGAUCCAUGACGAUGGac | 109 |
| KDR      | NM_002253 | GACGGACAGUGGUAUGGUUtt  | AACCAUACCACUGUCCGUctg | 164 |
| KHK      | NM_006488 | GUUUGGUCGUGUGAGGAAAtt  | UUUCCUCACACGACCAUACaa | 119 |
| KHK      | NM_006488 | GGUAAGGCCUUUAUAUGUAtt  | UACAUUAUAAGGCCUUACcca | 206 |
| KHK      | NM_006488 | GCCUGAAAGUCUCACCCUUt   | AAGGGUGAGACUUUCAGGCtc | 100 |
| KIAA0999 | NM_025164 | GGAACAUUGUUCAUCGUGAtt  | UCACGAUGAACAAUGUUCcga | 100 |
| KIAA0999 | NM_025164 | GCUUGAACGUGAAUCGGUUt   | AACCGAUUCACGUUCAAGctg | 99  |
| KIAA0999 | NM_025164 | GAACAUUGUUCAUCGUGAUtt  | AUCACGAUGAACAAUGUUCcg | 177 |
| KIAA1804 | NM_032435 | GUUUUAAGAGAAGUCGUUUAtt | UAAACGACUUCUCUUAACctt | 105 |
| KIAA1804 | NM_032435 | GAUUGUAGUGUAUCAAGAAAtt | UUCUUGAUACACUACAAUCag | 191 |

|          |              |                        |                        |     |
|----------|--------------|------------------------|------------------------|-----|
| KIAA1804 | NM_032435    | GCGGACAUGUGGGAAUGUAtt  | UACAUUCCCACAUGUCCGctg  | 199 |
| KIT      | NM_000222    | CAGUGGAUCUAUAUGAACAtt  | UGUUCAUAUAGAUCACUGct   | 138 |
| KIT      | NM_000222    | GCAGCGAUAGUACUAAUGAtt  | UCAUUAGUACUAUCGCUGCag  | 130 |
| KIT      | NM_000222    | GAAUGCCGGUCGAUUCUAAtt  | UUAGAAUCGACCGGCAUUCca  | 184 |
| KSR1     | NM_014238    | GCCUACUUCAUUCAUAtt     | UAUGAUGAAUGAAGUAGGCag  | 110 |
| KSR1     | NM_014238    | GGAAUGAAGCGUGUCCUGAtt  | UCAGGACACGCUUCAUUCctt  | 206 |
| KSR1     | NM_014238    | GGAGUGAAGUGCAAGCAUUt   | AAUGCUUGCACUUCACUCcAa  | 268 |
| KSR2     | NM_173598    | CGAAAACUGAUACACUUGAtt  | UCAAGUGUAUCAGUUUUCGgg  | 204 |
| KSR2     | NM_173598    | GCAUCCCACUACUACAAAUtt  | AUUUGUAGUAGUGGGAUGCtg  | 118 |
| KSR2     | NM_173598    | CAGGCAGAUUGCUCAGAAtt   | UUCUUGAGCAAUCUGCCUGgt  | 132 |
| LATS1    | NM_004690    | GCCUUGCAGGAAAUUCGAAtt  | UUCGAAUUUCCUGCAAGGCtt  | 94  |
| LATS1    | NM_004690    | CCUCCAUCAGAGUCAAUAtt   | UGAUUGACUCGUAUGGAGGaa  | 218 |
| LATS1    | NM_004690    | GGAGUGAUGAUAACGAGGAtt  | UCCUCGUUAUCAUCACUCcat  | 232 |
| LATS2    | NM_014572    | GGAAGAUCUCUACCAGAAtt   | UUCUGGUAGAGGAUCUUCcgc  | 152 |
| LATS2    | NM_014572    | GUUCGGACCUUAUCAGAAAtt  | UUUCUGAUAAAGGUCCGAActt | 136 |
| LATS2    | NM_014572    | GCAUUUUACGAAUUCACCUtt  | AGGUGAAUUCGUAAAAUGCgt  | 180 |
| LCK      | NM_001042771 | CCCGAACCCUGGUUCUUCAtt  | UGAAGAACCAGGGUUCGGGct  | 179 |
| LCK      | NM_001042771 | GGAAUUUAUUAUCAUCGUGAtt | UCACGAUGAAUAUAAUUCcgc  | 126 |
| LCK      | NM_001042771 | GGCAUCAAGUUGACCAUCAtt  | UGAUGGUCAACUUGAUGCctg  | 183 |
| LIMK1    | NM_002314    | GCAUGACCCUCACGAUACAtt  | UGUAUCGUGAGGGUCAUGCtc  | 136 |
| LIMK1    | NM_002314    | CCUCACGUGUGGGACCUUUt   | AAAGGUCCCACACGUGAGGca  | 90  |
| LIMK1    | NM_002314    | GCAUGAGCCCAGAUGUGAAtt  | UUCACAUCUGGGCUCAUGCag  | 116 |
| LIMK2    | NM_001031801 | AGCUGUUGAUUGAACAUAtt   | UCAUGUUCAAUCAACAGCUga  | 134 |
| LIMK2    | NM_001031801 | GCUGCAAGGUGAUCAUUGAtt  | UCAUGAUCACCUUGCAGCtc   | 195 |
| LIMK2    | NM_001031801 | CGUUCUCUGUGAGAUAUUt    | AAUGAUCUCACAGAGAACGat  | 153 |
| LMTK2    | NM_014916    | GCGACUAUUUAUCCAGUUt    | AACUGGAUAUAAUAGUCGctt  | 53  |
| LMTK2    | NM_014916    | GAGCAUCUUCUAUCCGGUUt   | AACCGGAUAGAAGAUGCUCgt  | 305 |
| LMTK2    | NM_014916    | CAGUCUACCUGUUUGACCAAtt | UGGUCAAACAGGUAGACUGtg  | 212 |
| LMTK3    | XM_936372    | GGAAUUUGAGAACCUGAAtt   | UUCAGGGUUCUCAAUUCctt   | 112 |
| LMTK3    | XM_936372    | GGACUACUGGUAUGACAUUt   | AAUGUCAUACCAGUAGUCCgc  | 117 |
| LMTK3    | XM_936372    | AGUUCAUCUCGGAAGCACAtt  | UGUGCUUCCGAGAUGAACUtg  | 97  |

|           |              |                        |                         |     |
|-----------|--------------|------------------------|-------------------------|-----|
| LOC375133 | NM_199345    | GGAAGCAAGUCAACCCAAAtt  | UUUGGGUUGACUUGCUUCGga   | 123 |
| LOC375133 | NM_199345    | GCGGCUGCGUGAAGACAUAtt  | UAUGUCUUCACGCAGCCGctt   | 174 |
| LOC375133 | NM_199345    | GGACCGCCAUGUUCUCAGAtt  | UCUGAGAACAUGGCGGUCCaa   | 154 |
| LOC390877 | XM_372705    | CCAGCGAAAUGCCUUGAGAtt  | UCUCAAGGCAUUUCGCUGGta   | 134 |
| LOC390877 | XM_372705    | GGUCUUGACCUACCAGCGAtt  | UCGCUGGUAGGUCAAGACCgg   | 250 |
| LOC390877 | XM_372705    | AGAAUAUGGCGACCAAGUAtt  | UACUUGGUCGCCAUAUUCUtg   | 279 |
| LRPPRC    | NM_133259    | GGGCUCUAAUGAGACUAGAtt  | UCUAGUCUCAUUAGAGCCCaa   | 73  |
| LRPPRC    | NM_133259    | CUAUAAGAGAUGUCCUAAAAtt | UUUAGGACAUCUCUUAUAGgt   | 128 |
| LRPPRC    | NM_133259    | GGAAGUUCG U UUGACGUAtt | UACGUCAAACGGAACUUCctg   | 335 |
| LRRK1     | NM_024652    | GGCCUCGCAUUGUAUAUGAtt  | UCAUAUACAAUGCGAGGCctg   | 142 |
| LRRK1     | NM_024652    | GCACAUCAACAUCAAGCUAtt  | UAGCUUGAUGUUGAUGUGCtc   | 163 |
| LRRK1     | NM_024652    | GACUCAGACAUGCUACAUAAtt | UAUGUAGCAUGUCUGAGUCct   | 375 |
| LRRK2     | NM_198578    | GCUGUGCCUUAUAACCGAAtt  | UUCGGUUUAUAAAGGCACAGCct | 80  |
| LRRK2     | NM_198578    | GUGAUGACCUGGAUAGUGAtt  | UCACUAUCCAGGUCAUACTt    | 73  |
| LRRK2     | NM_198578    | GGAAACGAUUAUUAACAACUtt | AGUUGUAUAUAAUCGUUUCcg   | 85  |
| LTK       | NM_206961    | GCAUGGAGCUAGCUGUGGAtt  | UCCACAGCUAGCUCCAUGCct   | 266 |
| LTK       | NM_206961    | AGAUCUUUGGAGUGCCUAAtt  | UUAGGCACUCCAAGAUCUgt    | 191 |
| LTK       | NM_206961    | GGAGAGGUAGAGAUCCGAAtt  | UUCGGAUCUCUACCUCUCgt    | 225 |
| LY6G5B    | NM_021221    | GCUCAUCCCUGUGCAUGGUtt  | ACCAUGCACAGGGAUGAGCtg   | 188 |
| LY6G5B    | NM_021221    | CCUUCUGUAGGAUGCAUUUtt  | AAAUGCAUCCUACAGAAGGgt   | 264 |
| LY6G5B    | NM_021221    | CCAGUGCUGUCAGUACGAUtt  | AUCGUACUGACAGCACUGGgc   | 285 |
| LYK5      | NM_001003788 | CCUAGAAGCUUGUCCAAUtt   | AUUGGAACAAGCUUCUAGGtt   | 116 |
| LYK5      | NM_001003788 | GAAUCUCCAGGGUUAUGAUtt  | AUCAUAACCCUGGAGAUUCtg   | 121 |
| LYK5      | NM_001003788 | CCAACAGGAGAGUACGUGAtt  | UCACGUACUCUCCUGUUGGtt   | 138 |
| LYN       | NM_002350    | ACAUUGUGGUAGCCUUGUAtt  | UACAAGGCUACCACAAUGUct   | 107 |
| LYN       | NM_002350    | CUAGAGUAAUUGAAGAUAAAtt | UUAUCUUCAAUACUCUAGca    | 172 |
| LYN       | NM_002350    | AGACUCAACCAGUACGUAAAtt | UUACGUACUGGUUGAGUCUtc   | 100 |
| MADD      | NM_130470    | CCACUACUAUAGUAAAGAAAtt | UUCUUUACUAUAGUAGUGGgt   | 125 |
| MADD      | NM_130470    | CAACAAGUUCUAUACUAAAAtt | UUUAGUAUAGAACUUGUUGag   | 152 |
| MADD      | NM_130470    | GACCCACUACUAUAGUAAAAtt | UUUACUAUAGUAGUGGGUctg   | 322 |
| MAG11     | NM_004742    | GAGCAUGUAUGAAAACCGAtt  | UCGGUUUUCAUACAUGCUCct   | 177 |

|           |           |                        |                       |     |
|-----------|-----------|------------------------|-----------------------|-----|
| MAGI1     | NM_004742 | GACUAGCAGGGUUCACGAAtt  | UUCGUGAACCCUGCUAGUCca | 240 |
| MAGI1     | NM_004742 | GGCCCUAACUCACAACCAAtt  | UUGGUUGUGAGUUAGGGCCtg | 473 |
| MAGI2     | NM_012301 | GAGGAAUUGUUGAUAAAGAtt  | UCUUUAUCAACAAUUCUCct  | 89  |
| MAGI2     | NM_012301 | GGAAAACGGAAGAGGAAUAtt  | UAUUCUCUCUCCGUUUUCctt | 161 |
| MAGI2     | NM_012301 | CGACUUGCGAAAAAGGCUAtt  | UAGCCUUUUUCGCAAGUCGtg | 299 |
| MAGI3     | NM_152900 | GGAUGUUUUUCUUCGAAAAtt  | UUUUCGAAGAAAAACAUCcAa | 122 |
| MAGI3     | NM_152900 | GAACCUUGGUUGUUAUCCAtt  | UGGAUAACAACCAAGGUUCtg | 90  |
| MAGI3     | NM_152900 | GAUGUUGUCUUGCAACGAAtt  | UUCGUUGCAAGACAACAUCat | 160 |
| MAK       | NM_005906 | GGAGGACUAUGAUUUUCGGAtt | UCCGAAAUCAUAGUCCUCcAa | 154 |
| MAK       | NM_005906 | GGACGUACUUUAUAUCCUAtt  | UAGGAUUUAAGUACGUCCtg  | 76  |
| MAK       | NM_005906 | GGACAAGUGAGGUCGAUGAtt  | UCAUCGACCUCACUUGUCcct | 223 |
| MAP2K1    | NM_002755 | GGAACCAGAUCAUAAAGGGAtt | UCCCUUAUGAUCUGGUUCcgg | 195 |
| MAP2K1    | NM_002755 | UGUUCAGUCUGGAAUUUCCAtt | UGAAAUUCCAGACUGAACAct | 56  |
| MAP2K1    | NM_002755 | AGGCCUUUCUUACCCAGAAtt  | UUCUGGGUAAGAAAGGCCUca | 353 |
| MAP2K1IP1 | NM_021970 | CAAACUUGGACUUUCCAAAtt  | UUUGGAAAGUCCAAGUUUGct | 93  |
| MAP2K1IP1 | NM_021970 | CAUUUUAAUCGUUUACCUUtt  | AAGGUAAACGAUUAAAUUGaa | 215 |
| MAP2K1IP1 | NM_021970 | GGUUCAAUUUAAUCGUUUAtt  | UAAACGAUUAAAUUGAACcAc | 412 |
| MAP2K2    | NM_030662 | GAUCAGCAUUUGCAUGGAAtt  | UUCCAUGCAAUUGCUGAUctc | 95  |
| MAP2K2    | NM_030662 | GAACUUGACGAGCAGCAGAtt  | UCUGCUGCUCGUCAGUUCcAa | 56  |
| MAP2K2    | NM_030662 | CAAAGACGAUGACUUCGAAtt  | UUCGAAGUCAUCGUCUUUGag | 230 |
| MAP2K3    | NM_002756 | GGUCGACUGUUUCUACACUtt  | AGUGUAGAAACAGUCGACCgt | 189 |
| MAP2K3    | NM_002756 | ACAGAAACUUUGAGGUGGAtt  | UCCACCUCAAAGUUUCUGUct | 78  |
| MAP2K3    | NM_002756 | CCCGGACCUUCAUCACCAUtt  | AUGGUGAUGAAGGUCCGGGag | 172 |
| MAP2K4    | NM_003010 | GGUAAACGCAAAGCACUGAtt  | UCAGUGCUUUGCGUUUACCct | 218 |
| MAP2K4    | NM_003010 | GCAUGCAGGGUAAACGCAAtt  | UUGCGUUUACCCUGCAUGCtg | 99  |
| MAP2K4    | NM_003010 | GCAACUGUGAAAGCACUAAtt  | UUAGUGCUUUCACAGUUGCta | 272 |
| MAP2K5    | NM_145160 | GCCCUCCAAUAUGCUAGUAtt  | UACUAGCAUAUUGGAGGGCtt | 98  |
| MAP2K5    | NM_145160 | GUAAUGGAACAGCAAGUAAtt  | UUACUUGCUGUCCAUUActg  | 187 |
| MAP2K5    | NM_145160 | GGCCUUACUUUAUUUGUGGAtt | UCCACAAUAAGUAAGGCctt  | 265 |
| MAP2K6    | NM_002758 | GCAUCACGAUGAUUGAGUUtt  | AACUCAAUCAUCGUGAUGCcc | 142 |
| MAP2K6    | NM_002758 | GGAUACAUCACUAGAUAAtt   | UUUAUCUAGUGAUGUAUCcat | 100 |

|         |              |                        |                        |     |
|---------|--------------|------------------------|------------------------|-----|
| MAP2K6  | NM_002758    | GGUGGACUCUGUUGCUGAAAtt | UUUAGCAACAGAGUCCACCaa  | 205 |
| MAP2K7  | NM_145185    | CGUCAUUGCCGUUAAGCAAtt  | UUGCUIAACGGCAAUGACGtg  | 143 |
| MAP2K7  | NM_145185    | GACAGUUUCCCUACAAGAAAtt | UUCUUGUAGGGAAACUGUCct  | 160 |
| MAP2K7  | NM_145185    | GCAUUGAGAUUGACCAGAAAtt | UUCUGGUCAAUCUCAAUUGCtc | 118 |
| MAP3K1  | XM_042066    | GCGUAGCUCAAGGAUCAAAAtt | UUUGAUCCUUGAGCUACGCct  | 131 |
| MAP3K1  | XM_042066    | GGCUCUUCGUUGUUUAGAAtt  | UUCUAAACAACGAAGAGCCac  | 142 |
| MAP3K1  | XM_042066    | GAAUCUCCAGGAGUAAGGAtt  | UCCUUACUCCUGGAGAUUCtg  | 278 |
| MAP3K10 | NM_002446    | GGCUUUGAGCAUAAGAUCAtt  | UGAUCUUAUGCUCAAAGCCag  | 127 |
| MAP3K10 | NM_002446    | GGCUUGAAGUCAUCGAACAtt  | UGUUCGAUGACUUAAGCCgc   | 168 |
| MAP3K10 | NM_002446    | GGUGCUUUCCCAAGACUGUtt  | ACAGUCUUGGGAAAGCACctg  | 281 |
| MAP3K11 | NM_002419    | CGUGAUCUCAAGUCCAACAtt  | UGUUGGACUUGAGAUCACGgt  | 151 |
| MAP3K11 | NM_002419    | GCGUAGCUGUUAACAAGCUtt  | AGCUUGUUAACAGCUACGCca  | 124 |
| MAP3K11 | NM_002419    | CAUGGUACCUGGAUUCAGAtt  | UCUGAAUCCAGGUACCAUGtg  | 36  |
| MAP3K12 | NM_006301    | GCAUCUCAUCGGAAGAGGAtt  | UCCUCUUCCGAUGAGAUGCca  | 106 |
| MAP3K12 | NM_006301    | CCAACAUGCUGAAUACCCUAtt | UAGGUGAUUAGCAUGUUGGgt  | 169 |
| MAP3K12 | NM_006301    | CCAUUUCUGAGGACUCAGAtt  | UCUGAGUCCUCAGAAUUGGga  | 233 |
| MAP3K13 | NM_004721    | CGUGAACACUAUGAGCGGAtt  | UCCGCUCAUAGUGUUCACGaa  | 102 |
| MAP3K13 | NM_004721    | GCUCAAUCCCAAUACCCUtt   | AAGGGUUAUUGGGAUUGAGCtt | 259 |
| MAP3K13 | NM_004721    | GAGUAAACCUCGAAACCGAtt  | UCGGUUUCGAGGUUUACUCtg  | 375 |
| MAP3K14 | NM_003954    | GUCCAAAUACAGUCUCUAtt   | UAAGAGACUGUAUUUGGACTt  | 117 |
| MAP3K14 | NM_003954    | GGAUUGACCUCACCCAGAAtt  | UUCUGGGUGAGGUCAAUCctg  | 258 |
| MAP3K14 | NM_003954    | GGAUUAUGAGUACCGAGAAtt  | UUCUCGGUACUCAUAAUCCac  | 532 |
| MAP3K15 | NM_001001671 | GGAUUGUUCGCGAUGGACAAtt | UUGUCCAUCGCGAACAUCcag  | 147 |
| MAP3K15 | NM_001001671 | CAAUCAAGUUUUACACCAAtt  | UUGGUGUAAAACUUGAUUGtc  | 103 |
| MAP3K15 | NM_001001671 | GGUUUAUACACUUUCGGAUAtt | UAUCCGAAAGUGUAUAACCct  | 127 |
| MAP3K2  | XM_001128799 | GGUCAUUCACUAGUAUCAAtt  | UUGAUACUAGUGAAUGACCca  | 131 |
| MAP3K2  | XM_001128799 | CCUCAUGUCUCAGACUAUAtt  | UAUAGUCUGAGACAUGAGGtg  | 64  |
| MAP3K2  | XM_001128799 | GUAUGAUGAUAGUCGAAUAtt  | UAUUCGACUAUCAUCAUActc  | 320 |
| MAP3K3  | NM_203351    | CGAGGGCUAUGGAAGGAAAtt  | UUUCCUCCAUAGCCCUCGcc   | 123 |
| MAP3K3  | NM_203351    | GGAAUACUCAGAUCCGGAAAtt | UUCCCGAUCUGAGUAUUCctg  | 230 |
| MAP3K3  | NM_203351    | GCCGGCCUGUGAAAUAUGAtt  | UCAUAUUUCACAGGCCGGctg  | 164 |



|           |              |                        |                        |     |
|-----------|--------------|------------------------|------------------------|-----|
| MAP3K4    | NM_005922    | CUAACGAACUGAUCUGGUUtt  | AACCAGAUcAGUUCGUUAGat  | 120 |
| MAP3K4    | NM_005922    | GCUUCGCCUUUGUUAGAGAtt  | UCUCUAACAAAGGCGAAGCtc  | 190 |
| MAP3K4    | NM_005922    | CCUCGACAGAUGAAACGCAtt  | UGCGUUUCAUCUGUCGAGGtg  | 115 |
| MAP3K5    | NM_005923    | GCGAGUAGAUAAUAUCGAAtt  | UUCGAUUAUAUCUACUCGCtg  | 146 |
| MAP3K5    | NM_005923    | GGACCGCUUUUACAAUGCAtt  | UGCAUUGUAAAAGCGGUCCag  | 99  |
| MAP3K5    | NM_005923    | GGUGAACACCAUUACCGAAtt  | UUCGGUAAUGGUGUUCACCat  | 230 |
| MAP3K6    | NM_004672    | GAGCAGCUGUAUAAGCUCAtt  | UGAGCUUAUACAGCUGCUCtg  | 65  |
| MAP3K6    | NM_004672    | GCAAGGCUUUUGACGUAGAtt  | UCUACGUCAAAAGCCUUGCga  | 190 |
| MAP3K6    | NM_004672    | GGAACUGAAUGUGGAUUCAtt  | UGAAUCCACAUUCAGUUCctg  | 171 |
| MAP3K7    | NM_145332    | CGUGUGAACCAUCCUAAUAtt  | UAUUAGGAUGGUUCACACGgg  | 145 |
| MAP3K7    | NM_145332    | AGAUACCAAUGGAUCAGAUtt  | AUCUGAUCCAUUGGUAUCUgt  | 100 |
| MAP3K7    | NM_145332    | GACUCGUUGUUGGUCUAAAtt  | UUUAGACCAACAACGAGUCat  | 295 |
| MAP3K7IP2 | NM_015093    | GAAUAAGUGAAACACGGAAAtt | UUCCGUGUUUCACUUAUUCta  | 87  |
| MAP3K7IP2 | NM_015093    | GGUUUUACAUGACCUGCGAtt  | UCGCAGGUCAUGUAAAACctg  | 156 |
| MAP3K7IP2 | NM_015093    | GUCGAGCAAUAGGCAAUAAAtt | UUAUUGCCUUAUUGCUCGACTt | 116 |
| MAP3K8    | NM_005204    | CCGCAGACCUACUAAAACAtt  | UGUUUUAGUAGGUCUGCGGct  | 111 |
| MAP3K8    | NM_005204    | CCCUCCUACCUGUACAUAAAtt | UUAUGUACAGGUAGGAGGgat  | 228 |
| MAP3K8    | NM_005204    | GGAACUUCUGAGAACAUAUtt  | AAUGUUCUCAGGAAGUUCcag  | 237 |
| MAP3K9    | NM_033141    | GCGAUGAAAUUGUCGUGUAtt  | UACACGACAAUUUCAUCGCtg  | 172 |
| MAP3K9    | NM_033141    | GACCAUCUUUCACGAAUAUtt  | AUAUUCGUGAAAGAUGGUCgt  | 146 |
| MAP3K9    | NM_033141    | CAAACGAGAUCCUAACCAAtt  | UUGGUUAGGAUCUCGUUUGaa  | 60  |
| MAP4K1    | NM_001042600 | GGGACAUCAAGGGAGCUAAAtt | UUAGCUCCCUUGAUGUCCctg  | 98  |
| MAP4K1    | NM_001042600 | CCAAGAUGCUCAGUCAUCAAtt | UGAUGACUGAGCAUCUUGGtg  | 206 |
| MAP4K1    | NM_001042600 | GCUCAGUCAUCAACUGGUAtt  | UACCAGUUGAUGACUGAGCat  | 185 |
| MAP4K2    | NM_004579    | CCAAGAUUCCUGACACCAAtt  | UUGGUGUCAGGAAUCUUGGtg  | 176 |
| MAP4K2    | NM_004579    | CCUAUGACAUGUUUCCAGAtt  | UCUGGAAACAUGUCAUAGGtc  | 165 |
| MAP4K2    | NM_004579    | GCAGCUACCUCAGGAAUGAtt  | UCAUCCUGAGGUAGCUGCca   | 174 |
| MAP4K3    | NM_003618    | GCACUUACCAAAAAUCCGAtt  | UCGGAUUUUUGGUAAGUGCca  | 189 |
| MAP4K3    | NM_003618    | CAAUCGAGCUGUUGGAUAAtt  | UUAUCCAACAGCUCGAUUGcc  | 221 |
| MAP4K3    | NM_003618    | GGCACGGAAUGUUAACACUtt  | AGUGUUAACAUUCCGUGCCtt  | 157 |
| MAP4K4    | NM_145687    | CCUAUGGACAAGUCUAUAAtt  | UUAUAGACUUGUCCAUAAGtg  | 135 |

|        |              |                        |                        |     |
|--------|--------------|------------------------|------------------------|-----|
| MAP4K4 | NM_145687    | CGGCUAGAAGAGCAACAAAtt  | UUUGUUGCUCUUCUAGCCGtc  | 168 |
| MAP4K4 | NM_145687    | CGAAGACGAUUUCAACAAAtt  | UUUGUUGAAAUCGUCUUCGgt  | 191 |
| MAP4K5 | NM_006575    | GAGUUAUCUUAGUCGGGAAtt  | UUCCCGACUAAGAUAAACUCcc | 92  |
| MAP4K5 | NM_006575    | CUACCAUUGCAAAAACGAAAtt | UUUCGUUUUGCAAUGGUAGct  | 158 |
| MAP4K5 | NM_006575    | GCAAAGGCACUGAAUCGAAtt  | UUCGAUUCAGUGCCUUUGCta  | 225 |
| MAPK1  | NM_138957    | CAGGGUUCUGACAGAAUAtt   | UAUUCUGUCAGGAACCCUGtg  | 271 |
| MAPK1  | NM_138957    | CAACCAUCGAGCAAUGAAAtt  | UUCAUUUGCUCGAUGGUUGgt  | 63  |
| MAPK1  | NM_138957    | GCAGAAAUGCUIUCUAACAtt  | UGUUAGAAAGCAUUUCUGCca  | 464 |
| MAPK10 | NM_138981    | GGAAUAAGGUAUUUGAACAtt  | UGUUCAUUACCUUAUUCc     | 127 |
| MAPK10 | NM_138981    | CAAGUAACAUUGUAGUCAAtt  | UUGACUACAAUGUUACUUGgt  | 73  |
| MAPK10 | NM_138981    | CCAUUUGUGGUGACACGUUtt  | AACGUGUCACCACAUUUGGag  | 108 |
| MAPK11 | NM_002751    | GCGACUACAUUGACCAGCUtt  | AGCUGGUCAAUGUAGUCGct   | 135 |
| MAPK11 | NM_002751    | GAACACGCCCGGACAUUAtt   | UAUAUGUCCGGGCGUGUUCtg  | 205 |
| MAPK11 | NM_002751    | GGAGCUCACUUAACAGGAAtt  | UUCGUGGUAAGUGAGCUCct   | 208 |
| MAPK12 | NM_002969    | CAGUUCUCGUGUACCAGAtt   | UCUGGUACACGAGGAACUGga  | 143 |
| MAPK12 | NM_002969    | GAAGUAUGAUGACUCCUUUtt  | AAAGGAGUCAUCAUACUUCtg  | 106 |
| MAPK12 | NM_002969    | GCAAGCUCAUGAAACAUGAtt  | UCAUGUUUCAUGAGCUUGCcc  | 119 |
| MAPK13 | NM_002754    | AAUGAGGACUGUGAACUGAtt  | UCAGUUCACAGUCCUCAUuca  | 93  |
| MAPK13 | NM_002754    | GGUGUAUCAGAUUCUCAAtt   | UUUGAGCAUCUGAUACACCag  | 58  |
| MAPK13 | NM_002754    | GCACAUCUACAAGGAGAUUtt  | AAUCUCCUUGUAGAUGUGct   | 155 |
| MAPK14 | NM_001315    | CCUAAAACCUAGUAAUCUAtt  | UAGAUUACUAGGUUUUAGGtc  | 162 |
| MAPK14 | NM_001315    | GAAGCUCUCCAGACCAUUUtt  | AAAUGGUCUGGAGAGCUUCct  | 211 |
| MAPK14 | NM_001315    | CUGCUGGUACUUAACAUAAtt  | UAUGUUUAAGUAACCGCAGtt  | 87  |
| MAPK15 | NM_139021    | AGAACGACAGGGACAUUUAtt  | UAAAUGUCCCUGUCGUUCUct  | 98  |
| MAPK15 | NM_139021    | UGAACGCAGUCAUCCGGAAtt  | UUCCGGAUGACUGCGUUCAgg  | 92  |
| MAPK15 | NM_139021    | AGAACAUUCGCGGAAAUCAAtt | UGAUUUCGCGGAAUGUUCUct  | 139 |
| MAPK3  | NM_001040056 | GGAUCAGCUCAACCACAUUtt  | AAUGUGGUUGAGCUGAUCCag  | 46  |
| MAPK3  | NM_001040056 | GGACCGGAUGUUAACCUUtt   | AAAGGUUAACAUCGCGUCCag  | 71  |
| MAPK3  | NM_001040056 | GACCUGAAUUGUAUCAUAtt   | UGAUGAUACAAUUCAGGUCct  | 160 |
| MAPK4  | NM_002747    | GGAUCGUUGAUCAGCAUUAtt  | UAAUGCUGAUCAACGAUCct   | 123 |
| MAPK4  | NM_002747    | CAGAAGGGUUGGUAACAAAtt  | UUUGUUAACCAACCCUUCUGac | 127 |

|          |              |                        |                        |     |
|----------|--------------|------------------------|------------------------|-----|
| MAPK4    | NM_002747    | CCACAAGGGUUAUCUGUCAtt  | UGACAGAUAAACCCUUGUGGga | 192 |
| MAPK6    | NM_002748    | CCAUCCUUACAUGAGCAUAtt  | UAUGCUCUAUGUAAGGAUGGga | 164 |
| MAPK6    | NM_002748    | CUAGGUUAUUGGACUAAAAtt  | UUUAAGUCCAUAUACCUAGaa  | 150 |
| MAPK6    | NM_002748    | CUACUGAUGUUGUUGAUAAAtt | UUAUCAACAACAUCAGUAGgc  | 176 |
| MAPK7    | NM_139034    | GCUGAACAUACAGUACUUCAtt | UGAAGUACUGAUGUUCAGCgg  | 145 |
| MAPK7    | NM_139034    | GAGGAAUUCUAAAACAGUtt   | ACUGGUUUAAAGAAUCCUCca  | 130 |
| MAPK7    | NM_139034    | CCAUUGAUCUGACCCUGCAtt  | UGCAGGGUCAGAUCAAUGGtg  | 94  |
| MAPK8    | NM_002750    | GUUGCAAUCAAGAAGCUAAAtt | UUAGCUUCUUGAUUGCAACat  | 118 |
| MAPK8    | NM_002750    | CAAAGAUCCCUGACAAGCAtt  | UGC UUGUCAGGGAUCUUUGgt | 81  |
| MAPK8    | NM_002750    | CCAGUAAUAUAGUAGUAAAAtt | UUUACUACUAUAUUACUGGgc  | 141 |
| MAPK9    | NM_002752    | GAAUCUGAGCGAGACAAAAtt  | UUUUGUCUCGCUCAGAUUCtg  | 152 |
| MAPK9    | NM_002752    | CUUACGUGGUGACACGGUAtt  | UACCGUGUCACCACGUAAGgg  | 95  |
| MAPK9    | NM_002752    | GCGGAUCUCUGUAGACGAAtt  | UUCGUCUACAGAGAUCCGCtt  | 155 |
| MAPKAPK2 | NM_004759    | GGAUCAUGCAAUCAACAAAAtt | UUUGUUGAUUGCAUGAUCCaa  | 148 |
| MAPKAPK2 | NM_004759    | CAGUAUCUGCAUUCAAUCAtt  | UGAUUGAAUGCAGAUACUGga  | 314 |
| MAPKAPK2 | NM_004759    | GGACGGUGGAGAACUCUUUtt  | AAAGAGUUCUCCACCGUCCaa  | 90  |
| MAPKAPK3 | NM_004635    | GGUGGUGAGUUGUUCAGCAtt  | UGCUGAACAAACUCACCACctt | 138 |
| MAPKAPK3 | NM_004635    | UGUCAAGCCUGAAAACCUAtt  | UAGGUUUUCAGGCUUGACAtc  | 130 |
| MAPKAPK3 | NM_004635    | ACCCUGCUAUACUCCCUAUtt  | AUAGGGAGUAUAGCAGGGUgt  | 248 |
| MAPKAPK5 | NM_003668    | CCACGACCAUGAGAAUGGAtt  | UCCAUUCUCAUGGUCGUGGat  | 64  |
| MAPKAPK5 | NM_003668    | GAAUGGUCGUGGAUUCACAtt  | UGUGAAUCCACGACCAUUCca  | 105 |
| MAPKAPK5 | NM_003668    | CACCGGCACUUUACAGAGAtt  | UCUCUGUAAAGUGCCGGUGct  | 368 |
| MARK1    | NM_018650    | GGUGGUGAAUCGUUAUCCAtt  | UGGAUAACGAUUCACCACctt  | 89  |
| MARK1    | NM_018650    | GCACAACAGUUGGAUCAAAAtt | UUUGAUCCAACUGUUGUGCtg  | 128 |
| MARK1    | NM_018650    | GAAUCAUCCUAAUAUAGGUtt  | ACCUAUAUUAGGAUGAUUCag  | 276 |
| MARK2    | NM_001039468 | GCCUAGGAGUUAUCCUCUAtt  | UAGAGGAUAACUCCUAGGctc  | 147 |
| MARK2    | NM_001039468 | GAAUCAUCCCAACAUAAGUUtt | AACUAUGUUGGGAUGAUUCaa  | 143 |
| MARK2    | NM_001039468 | GACUCAGAGUAACAACGCAtt  | UGC GUUGUACUCUGAGUCtt  | 167 |
| MARK3    | NM_002376    | CCAUUGUCCCAGACUCGAAtt  | UUCGAGUCUGGGACAAUGGtg  | 151 |
| MARK3    | NM_002376    | GCGGUAAACUCGACACGUUtt  | AACGUGUCGAGUUUACCGCca  | 179 |
| MARK3    | NM_002376    | CGGAUAUUCUGAACGCAAtt   | UUGCGUUCAGGAAUAUCCGcc  | 113 |

|          |           |                       |                        |     |
|----------|-----------|-----------------------|------------------------|-----|
| MARK4    | NM_031417 | GCAGAACUCUAACCGCUGUtt | ACAGCGGUUAGAGUUCUGCcg  | 188 |
| MARK4    | NM_031417 | GCACUAAUUGUCACCAGAAAt | UUUCUGGUGACAAUAGUGCac  | 641 |
| MARK4    | NM_031417 | CACCUACGUUUGCACAGAAAt | UUCUGUGCAAACGUAGGUGtt  | 79  |
| MAST1    | NM_014975 | CCGCACCAGUAAUCGGAAAt  | UUUCCGAUUACUGGUGCGGca  | 193 |
| MAST1    | NM_014975 | CCAUCAAGCUCAUAAAGCAAt | UUGCUIAUGAGCUUGAUGGta  | 492 |
| MAST1    | NM_014975 | GUGAAGAAGUUGCUUAUUAt  | UAAUAAGCAACUUCUUCACca  | 394 |
| MAST2    | NM_015112 | CGUCUAUACUUUGCGGAAAt  | UUUCCGCAAAGUAUAGACGca  | 243 |
| MAST2    | NM_015112 | GAUACUAGCUAUUUUGACAAt | UGUCAAAAUAGCUAGUAUCat  | 249 |
| MAST2    | NM_015112 | GUAUGAGGGUCAUAUUGAAAt | UUCAUAUGACCCUCAUACaa   | 185 |
| MAST3    | XM_038150 | GACCUUCCACAGUACAUCAt  | UGAUGUACUGUGGAAGGUCag  | 126 |
| MAST3    | XM_038150 | GAAGAGCGGCAACAAGAUAt  | UAUCUUGUUGCCGCUCUUCag  | 220 |
| MAST3    | XM_038150 | GGAGUACCUGCAUAACUAUtt | AUAGUUAUGCAGGUACUCcag  | 188 |
| MASTL    | NM_032844 | GAGUAAUAGCAUAACGAAAt  | UUUCGUUAUGCUUAUACUCta  | 152 |
| MASTL    | NM_032844 | GGACAAGUGUUAUCGCUUAt  | UAAGCGAUAACACUUGUCctg  | 169 |
| MASTL    | NM_032844 | GCCCUUAGAUUCAGAUAGAt  | UCUAUCUGAAUCUAAGGGCtg  | 192 |
| MATK     | NM_002378 | CGAUAAAGACGGAUUCUAAt  | UUAGAAUCCGUCUUUAUCGgg  | 319 |
| MATK     | NM_002378 | AGUGUGAUGUGACAGCCCAAt | UGGGCUGUCACAUCACACUtg  | 470 |
| MATK     | NM_002378 | AGACGGCCGUCAUGACGAAt  | UUCGUCAUGACGGCCGUCUcg  | 105 |
| MELK     | NM_014791 | GGUUGUCUCCGUCAGAUAt   | UAUCUGACGGAAGACAACCcg  | 166 |
| MELK     | NM_014791 | GAAACGGAUUUCUAUGAAAt  | UUUCAUAGAAAUCCGUUUCtt  | 185 |
| MELK     | NM_014791 | CCUGGAUCAUGCAAGAUUAt  | UAAUCUUGCAUGAUCCAGGga  | 164 |
| MERTK    | NM_006343 | GAACUUACCUUACAUAGCUtt | AGCUAUGUAAGGUAAGUUCaa  | 129 |
| MERTK    | NM_006343 | CAGUAGCCGUGUUAACGAAt  | UUCGUUAACACGGCUACUGtt  | 196 |
| MERTK    | NM_006343 | GGAUGAAGCCUCCGACUAAt  | UUAGUCGGAGGCUUCAUCat   | 110 |
| MET      | NM_000245 | GCACUAGCAAAGUCCGAGAt  | UCUCGGACUUUGCUAGUGCct  | 160 |
| MET      | NM_000245 | CACCUUAUCCUGACGUAAAAt | UUUACGUCAGGAUAAGGUGgg  | 175 |
| MET      | NM_000245 | GCUACUUAUGUGAACGUAAAt | UUACGUUCACAUAAAGUAGCgt | 216 |
| MFHAS1   | NM_004225 | GCAGAUUGAAUAUAGCUUtt  | AAAGCUAAUUCAAUCUGCaa   | 148 |
| MFHAS1   | NM_004225 | GCCUCAUGCUAGACAACAAt  | UUGUUGUCUAGCAUGAGGctc  | 166 |
| MFHAS1   | NM_004225 | CAGGUCGGAUGGUAAAUUtt  | AAAUUUACCAUCCGACCUgtg  | 354 |
| MGC42105 | NM_153361 | GAAUGAUGAAUGGAUGCAAt  | UUGCAUCCAUAUCAUUCat    | 82  |

|          |           |                         |                        |     |
|----------|-----------|-------------------------|------------------------|-----|
| MGC42105 | NM_153361 | CACAUGCAUGAAAACCAAAtt   | UUUGGUUUUCAUGCAUGUGct  | 104 |
| MGC42105 | NM_153361 | GCAUAUUCGAAAUAACCAAAtt  | UUGGUUAUUUCGAAUAUGCtc  | 68  |
| MINK1    | NM_153827 | CGUACGGGCGCAUCAUUAAtt   | UUA AUGAUGCGCCCGUACGtg | 102 |
| MINK1    | NM_153827 | GGAGGACUGUAUCGCCUAUtt   | AUAGGCGAUACAGUCCUCctt  | 136 |
| MINK1    | NM_153827 | GAAUCCCGCUGACAAACCAAtt  | UGGUUUUGUCAGCGGGAUUCat | 134 |
| MKNK1    | NM_003684 | GCCCUUGACUUCUGCAUAtt    | UAUGCAGGAAGUCAAGGGCag  | 134 |
| MKNK1    | NM_003684 | CCGUCAAAAUCAUCGAGAAAtt  | UUCUCGAUGAUUUUGACGGca  | 245 |
| MKNK1    | NM_003684 | GGAGUAGGGUGUUUCGAGAtt   | UCUCGAAACACCCUACUCGga  | 384 |
| MKNK2    | NM_199054 | GGAAUUUUGUAUUCUGUUUtt   | AAACAGAAUACAAAAUUCGgg  | 151 |
| MKNK2    | NM_199054 | GCAGCGGCAUCAAACUCAAtt   | UUGAGUUUGAUGCCGCUGCcc  | 85  |
| MKNK2    | NM_199054 | GCCUUGGACUUUCUGCAUAtt   | UAUGCAGAAAGUCCAAGGCgc  | 225 |
| MLCK     | NM_182493 | UGAACAUUGCUGAACGAGAAAtt | UUCUCGUUCAGCAUGUUCAgc  | 88  |
| MLCK     | NM_182493 | GGAUCUCCAUCACAUACAtt    | UGUAUGUGGAUGGAGAUCctt  | 63  |
| MLCK     | NM_182493 | GACCAUGAAUUUCAUUGUAtt   | UACAAUGAAAUUCAUGGUctc  | 136 |
| MLKL     | NM_152649 | GCUAAGAAGAGAUAAUGAAAtt  | UUCAUUAUCUCUUCUUAAGCat | 118 |
| MLKL     | NM_152649 | CGAUUAGAAAUCAACAUGAtt   | UCAUGUUGAUUUUCUAAUCGtc | 124 |
| MLKL     | NM_152649 | CGUGGAUUCUGCUAAGGGAtt   | UCCCUUAGCAGAAUCCACGgg  | 185 |
| MORN1    | NM_024848 | CACGGGAAGUUGUUUUUAtt    | UAAAUACAACUUCCCGUGac   | 145 |
| MORN1    | NM_024848 | CACCUUCUCUGGACAGUUUtt   | AAACUGUCCAGAGAAGGUGtc  | 157 |
| MORN1    | NM_024848 | CGAUUAUGAAGGAGAAUGGAtt  | UCCAUUCUCCUUCAUAUCGaa  | 131 |
| MOS      | NM_005372 | GGACAGUUAAGUUUGGGAAtt   | UUCCCAACUUAACUGUCctc   | 145 |
| MOS      | NM_005372 | GCCUAAAGCCGACAUUUUAtt   | AUAAAUGUCGGCUUUAGGCgt  | 231 |
| MOS      | NM_005372 | CGGUGUACAAGGCGACUUAtt   | UAAGUCGCCUUGUACACCGag  | 229 |
| MPP1     | NM_002436 | GGAGUACCACUUUAUCUCAtt   | UGAGAUAAAGUGGUACUCctt  | 157 |
| MPP1     | NM_002436 | GCUCGAUUUUUGAUCAGUUtt   | AACUGAUCAAAAUCGAGCtg   | 166 |
| MPP1     | NM_002436 | CAGUGCACCAGAUCCAUAAtt   | UUAUGGAUCUGGUGCACUGtt  | 188 |
| MPP2     | NM_005374 | CGGCCGAGUUUGUCCCUAtt    | UAAGGGACAAACUCGGCCgtt  | 131 |
| MPP2     | NM_005374 | AGGUCAGGGUUACAGCUUUtt   | AAAGCUGUAACCCUGACCUtc  | 188 |
| MPP2     | NM_005374 | UGAUGUAUUUGACCACCAAtt   | UUGGUGGUCAAAUACAUCAtt  | 177 |
| MPP3     | NM_001932 | GAAGAUCGCUUAAAGGAGAtt   | UCUCCUUUAAGCGAUCUUCct  | 135 |
| MPP3     | NM_001932 | CAUAUUCGAUGAGGAUUUUtt   | AAAAUCCUCAUCGAUAUUGtc  | 83  |

|       |           |                        |                       |     |
|-------|-----------|------------------------|-----------------------|-----|
| MPP3  | NM_001932 | GAAGCUUCGCUAUUAUGAAtt  | UUCAUAAUAGCGAAGCUUCtc | 104 |
| MPP4  | NM_033066 | CCCUAUCAAUUUCUAUGGAtt  | UCCAUAGAAAUUGAUAGGGtt | 196 |
| MPP4  | NM_033066 | GGUGUUAUCCUAUGAGGUAtt  | UACCUCAUAGGAUAACACctg | 115 |
| MPP4  | NM_033066 | GCUAU AUGCUGGAGACAAAtt | UUUGUCUCCAGCAUUAAGCaa | 128 |
| MPP5  | NM_022474 | GAAUCAGACAGCGAAGUAAtt  | UUACUUCGCUGUCUGAUUCct | 219 |
| MPP5  | NM_022474 | CAUAGAUUCUGUACGGCAAtt  | UUGCCGUACAGAAUCUAUGct | 138 |
| MPP5  | NM_022474 | CGAUCUUGAUAAAGCCUAUtt  | AUAGGCUUUAUCAAGAUCGga | 125 |
| MPP6  | NM_016447 | CCUAAUACCUUGCAAAGAAAtt | UUCUUUGCAAGGUUUAGGtt  | 102 |
| MPP6  | NM_016447 | CAUUACUCCUCAACAGGUAtt  | UACCUGUUGAGGAGUAAUGgt | 84  |
| MPP6  | NM_016447 | GGACAAUUCAGGACCUUUUtt  | AAAAGGUCCUGAAUUGUCCca | 104 |
| MPP7  | NM_173496 | CCGUUUCGGCGACAAACUAtt  | UAGUUUGUCGCCGAUACGGtg | 78  |
| MPP7  | NM_173496 | GGCAAUCCAUGUAAGGAAtt   | UUCCUUACAUGGAAUUGCCtt | 130 |
| MPP7  | NM_173496 | GGAUACCAGUGGAGGAUAAtt  | UUAUCCUCCACUGGUUUCcg  | 83  |
| MRC2  | NM_006039 | CCUGCCCAAUGUGACCUUUtt  | AAAGGUCACAUUGGGCAGGct | 125 |
| MRC2  | NM_006039 | GUAUGAGUGUGACCGGGAAtt  | UUCCCGGUCACACUCAUACat | 249 |
| MRC2  | NM_006039 | GAUCUUCGGUGAAUCAGAAtt  | UUCUGAUUCACCGAAGAUCtt | 95  |
| MST1R | NM_002447 | GGCCCAGAAUCGAAUCCAAtt  | UUGGAUUCGAUUCUGGGCCtg | 119 |
| MST1R | NM_002447 | GGACAGCUCAAAACUCAGAtt  | UCUGAGUUUUGAGCUGUCCtt | 68  |
| MST1R | NM_002447 | GCGUAGAUGGUGAAUGUCAtt  | UGACAUUCACCAUCUACGCag | 166 |
| MUSK  | NM_005592 | GUAAGUUUGUUCACCGAGAtt  | UCUCGGUGAACAACUUCGgt  | 153 |
| MUSK  | NM_005592 | GCAUAGCAGAAUGGAGUAAtt  | UUACUCCAUUCUGCUAUGCtg | 182 |
| MUSK  | NM_005592 | GCUUACCUCUCAGAACGUAtt  | UACGUUCUGAGAGGUUAGCca | 212 |
| MVK   | NM_000431 | GGGAAGAUUUCUCCUUAAtt   | UUAAGGAUGAAAUCUCCctt  | 162 |
| MVK   | NM_000431 | GCAAGGUGAUGUCACAACAtt  | UGUUGUGACAUCACCUUGCtc | 155 |
| MVK   | NM_000431 | GGAGCAAGGUGAUGUCACAtt  | UGUGACAUCACCUUGCUCcag | 160 |
| MYLK  | NM_053028 | GCCUCAUGUAAAACCCUAUtt  | AUAGGGUUUUACAUGAGGctt | 104 |
| MYLK  | NM_053028 | GGACGGGAACUGCUCUUUAtt  | UAAAGAGCAGUCCCCGUCCtc | 168 |
| MYLK  | NM_053028 | GACCAUUCGCGAUUUAGAAtt  | UUCUAAAUCGCGAAUGGUctt | 303 |
| MYLK2 | NM_033118 | GGGCAUUUGGUGAAGAUCAtt  | UGAUCUUCACCAAUUGCCgg  | 104 |
| MYLK2 | NM_033118 | GGUGGUGAAUUAUGACCAAtt  | UUGGUCAUAAUUCACCACctc | 150 |
| MYLK2 | NM_033118 | CCAAAUCUCCGAUAAGACAtt  | UGUCUUAUCGGAGAUUUGGtc | 144 |

|       |              |                         |                        |     |
|-------|--------------|-------------------------|------------------------|-----|
| NADK  | NM_023018    | AGGAGAACAUGAUCGUGUAtt   | UACACGAUCAUGUUCUCCUcc  | 160 |
| NADK  | NM_023018    | CGUGUAUGUGGAAAAGAAAtt   | UUUCUUUCCACAUACACGat   | 162 |
| NADK  | NM_023018    | GUACCUUUCGAGAAGAUUAtt   | UAAUCUUCUCGAAAGGUACag  | 100 |
| NAGK  | NM_017567    | GGCUAGGGAUACUCACUCAtt   | UGAGUGAGUAUCCCUAGCCga  | 181 |
| NAGK  | NM_017567    | GCUACUUAUCACCACCGAtt    | UCGGUGGUGAUUAAGUAGCtt  | 212 |
| NAGK  | NM_017567    | GAUCGGCUAGGGAUACUCAtt   | UGAGUAUCCCUAGCCGAUCtg  | 223 |
| NEK1  | NM_012224    | GAUUGAAGGCGGUGUCUAAtt   | UUAGACACCGCCUCAAUCtt   | 254 |
| NEK1  | NM_012224    | CGUAGGAGAUGUUCGUCAAtt   | UUGACGAACAUCUCCUACGgt  | 180 |
| NEK1  | NM_012224    | CCGUAGGAGAUGUUCGUCAAtt  | UGACGAACAUCUCCUACGgtg  | 267 |
| NEK10 | NM_001031741 | GAAUUGGACAUUUCGGAUAtt   | UAUCCGAAAUGUCCAAUUCat  | 113 |
| NEK10 | NM_001031741 | UCAGUUCGAUGAUUAUCAGAtt  | UCUGAUUAUCAUCGAACUGAct | 103 |
| NEK10 | NM_001031741 | GCUAGAACGGGAACGAAGAtt   | UCUUCGUUCCCGUUCUAGCtt  | 134 |
| NEK11 | NM_024800    | GCAUGCAUUUUGUAUGAGAtt   | UCUCAUACAAAUGCAUGCca   | 210 |
| NEK11 | NM_024800    | CCACGAACUUGAAUCAAUUtt   | AAUUGAUUCAAGUUCGUGGag  | 142 |
| NEK11 | NM_024800    | GAUACGUGCUUCAACAAAAtt   | UUUUGUUGAAGCACGUAUctt  | 119 |
| NEK2  | NM_002497    | GGCGAAUUCCAUACCGUUAtt   | UAACGGUAUGGAAUUCGCctg  | 273 |
| NEK2  | NM_002497    | CAUCGUUCGUUACUAUGAUtt   | AUCAUAGUAACGAACGAUGtt  | 198 |
| NEK2  | NM_002497    | GCUUGCUAAAGGAACGGAAAtt  | UUCCGUUCUUAAGCAAGctg   | 196 |
| NEK3  | NM_002498    | CUUAAUUGGUUUACCCAAAtt   | UUUGGGUAAACCAAUUAAgta  | 199 |
| NEK3  | NM_002498    | GGCAUUUGCUUGUACCUAUtt   | AUAGGUACAAGCAAUUGCCat  | 99  |
| NEK3  | NM_002498    | CAUCCAUUUCAGGCAAUAAtt   | UAUUUGCCUGAAAUGGAUGct  | 146 |
| NEK4  | NM_003157    | GCGUAAAUAUUGACAUCUUt    | AAGAUGUCAAUUUUACGcta   | 85  |
| NEK4  | NM_003157    | GAAUCCACCCAGAUUUACAtt   | UGUAAAUCUGGGUGGAUUctg  | 122 |
| NEK4  | NM_003157    | CCAACAUUGUCACCUACAAtt   | UUGUAGGUGACAAUGUUGGga  | 155 |
| NEK5  | NM_199289    | CCUACAACAUAUAAAACGGAtt  | UCCGUUUUAUUGUUGUAGGgt  | 96  |
| NEK5  | NM_199289    | CUACAACAUAUAAAACGGAUtt  | AUCCGUUUUAUUGUUGUAGgg  | 79  |
| NEK5  | NM_199289    | CGAGACCGACCAUCCAUAAtt   | UUAUGGAUGGUCGGUCUCGag  | 138 |
| NEK6  | NM_014397    | GCACUACUCCGAGAAGUUAtt   | UAACUUCUCGGAGUAGUGctc  | 69  |
| NEK6  | NM_014397    | CAACUGAACCCACCCAAAUAAtt | UAUUUGGGUGGUUCAGUUGct  | 120 |
| NEK6  | NM_014397    | GGCUGUCUGCUGUACGAGAtt   | UCUCGUACAGCAGACAGCCca  | 328 |
| NEK7  | NM_133494    | GACCGGAUAUGGGCUAUAAAtt  | UUAUAGCCCAUAUCCGGUctg  | 186 |

|      |              |                        |                        |     |
|------|--------------|------------------------|------------------------|-----|
| NEK7 | NM_133494    | CCAGAAUGAUCAAGCAUUUtt  | AAAUGCUUGAUCAUUCUGGat  | 72  |
| NEK7 | NM_133494    | GCCGGUUUUUCAGCUCAAAtt  | UUUGAGCUGAAAAACCGGCca  | 99  |
| NEK8 | NM_178170    | GGGUGAUUGCACACUUUUtt   | AAAAGUGUAGCAAUCACCCGga | 132 |
| NEK8 | NM_178170    | CCAAGAUCCUUAGCAGCAAtt  | UUGCUGCUAAGGAUCUUGGag  | 158 |
| NEK8 | NM_178170    | CCUUUGCACCUAUCUCUGAtt  | UCAGAGAUAGGUGCAAAGGtg  | 252 |
| NEK9 | NM_033116    | GGACUCAAUUGAAUUCAAUAtt | UAUUGAAUUCAUUGAGUCCac  | 103 |
| NEK9 | NM_033116    | GCUUAUCCAUUGGAACUGUtt  | ACAGUUCCAAUGGAUAAGCca  | 79  |
| NEK9 | NM_033116    | GCUGGAAUUAUUGUAAUGGAtt | UCCAUAACAAUAUCCAGCtc   | 90  |
| NLK  | NM_016231    | CCAGAAAUCCUGAUGGGCAtt  | UGCCCAUCAGGAUUUCUGGag  | 238 |
| NLK  | NM_016231    | GGUGUUGUCUGGUCAGUAAtt  | UUACUGACCAGACAACACCaa  | 289 |
| NLK  | NM_016231    | CCAAAAGAAUAUCCGCUAAtt  | UUAGCGGAUAUUCUUUUGGat  | 537 |
| NME1 | NM_000269    | GCUUGUGGUUUCACCCUGAtt  | UCAGGGUGAAACCACAAGCcg  | 67  |
| NME1 | NM_000269    | GCAUAGGAUUCAUUGAGUUtt  | AACUCAUUGAAUCCUAUGCtg  | 191 |
| NME1 | NM_000269    | CUGAGGAACUGGUAGAUUAtt  | UAAUCUACCAGUCCUCAGgg   | 204 |
| NME2 | NM_001018138 | GCACUACAUUGACCUGAAAtt  | UUUCAGGUCAAUGUAGUGCtg  | 128 |
| NME2 | NM_001018138 | GCCUAUGGUUUAAGCCUGAtt  | UCAGGCUUAAACCAUAGGCtg  | 187 |
| NME2 | NM_001018138 | GAAUUCAGCCUAUGGUUUAtt  | UAAACCAUAGGCUGAUUUctt  | 169 |
| NME3 | NM_002513    | GCAUCGAGGUUGGCAAGAAtt  | UUCUUGCCAACCUCGAUGCag  | 90  |
| NME3 | NM_002513    | GCGCUUGGAGCAUCCCUUtt   | AAAGGGAUGCUCCAAGCGCtg  | 63  |
| NME3 | NM_002513    | CCAACGUGGUCCAACGUUUtt  | AAACGUUGGACCACGUUGGgc  | 167 |
| NME4 | NM_005009    | AGCACAAGAUUGGACCAAUtt  | AUUGGUCCAUCUUGUGCUgg   | 121 |
| NME4 | NM_005009    | AGAUUGGACCAAUCCUUUUtt  | AAAAGGAUUGGUCCAUCUtg   | 173 |
| NME4 | NM_005009    | GCAAGAACCCAAGCCACAtt   | UGUGGGCUUGGGUUCUUGCtg  | 188 |
| NME5 | NM_003551    | CAGAUAUUGUUGACAAAGAtt  | UCUUUGUCAACAAUAUCUGgt  | 186 |
| NME5 | NM_003551    | GAACUUUUGGGACCAAAUAtt  | UAUUUGGUCCCAAAGUUCta   | 126 |
| NME5 | NM_003551    | GCUAAGGACUAUUUAAAUtt   | AAUUUAAAUAUGCCUUAGCag  | 145 |
| NME6 | NM_005793    | GGAGUUUCGGCCUCACUGAtt  | UCAGUGAGGCCGAAACUCcca  | 142 |
| NME6 | NM_005793    | GUUUUACCGAGAGCAUGAAtt  | UUCAUGCUCUCGGUAAAACct  | 118 |
| NME6 | NM_005793    | AGUCCUGAUUGUACGAAUtt   | AUUCGUACAAUCAGGAACUtg  | 387 |
| NME7 | NM_013330    | CUGGAUUUACUAUAACCAAtt  | UUGGUUAUAGUAAAUCAGct   | 137 |
| NME7 | NM_013330    | CAAUGGAGAUUCAACAGAAtt  | UUCUGUUGAAUCUCCAUUGct  | 112 |



|       |              |                       |                        |     |
|-------|--------------|-----------------------|------------------------|-----|
| NME7  | NM_013330    | GGGUUAAUGUUGAGGAAUUt  | AAUUCCUCAACAUUAACCCGa  | 178 |
| NRBP1 | NM_013392    | CCAUUACAGAGGGAGUUCAt  | UGAACUCCCUCUGUAAUGGgt  | 73  |
| NRBP1 | NM_013392    | GACGAUGAAUGAAAAGGCAt  | UGCCUUUUCAUUCAUCGUct   | 182 |
| NRBP1 | NM_013392    | CCAGCUCUGGAAUUAGAUAt  | UAUCUAAUUCAGAGCUGGtg   | 183 |
| NRBP2 | NM_178564    | GGAAUGGAAUCUACCCACUtt | AGUGGGUAGAUUCCAUCctg   | 114 |
| NRBP2 | NM_178564    | GGCUCAGUCUAGAGAUUUt   | AAAUCUCUAAGACUGAGCCag  | 83  |
| NRBP2 | NM_178564    | AGAGAUUUCUAUGCCCUCAt  | UGAGGGCAUAGAAAUCUCUaa  | 36  |
| NRGN  | NM_006176    | CACACUCACUAAAAGAAAAt  | UUUUCUUUAAGUGAGUGGct   | 143 |
| NRGN  | NM_006176    | GCCGGACGACGACAUUCUAt  | UAGAAUGUCGUCGUCCGGct   | 239 |
| NRGN  | NM_006176    | CCCAAGCACACUCACUUAAt  | UUAAGUGAGUGUGCUUGGGtg  | 206 |
| NRK   | NM_198465    | CUUAUACGCUGGAUUCGUAt  | UACGAAUCCAGCGUAUAAGat  | 141 |
| NRK   | NM_198465    | GGAGUUCGCAAAAUCGUAt   | UGACGAUUUUGCGAACUCct   | 126 |
| NRK   | NM_198465    | CUGUAUACUUGACAAACGAt  | UCGUUUGUCAAGUAUACAGgg  | 135 |
| NTRK1 | NM_001007792 | GAGAGCAUCCUGUACCGUAt  | UACGGUACAGGAUGCUCUCgg  | 132 |
| NTRK1 | NM_001007792 | GCUCCUUGUGCUCACAAAAt  | UUUGUUGAGCACAAAGGAGCag | 168 |
| NTRK1 | NM_001007792 | CAACAAAUGUGGACGGAGAt  | UCUCCGUCCACAUUUGUUGag  | 276 |
| NTRK2 | NM_001018065 | GCUCCUUAAGGAUAACUAAt  | UUAGUUAUCCUUAAGGAGCcc  | 111 |
| NTRK2 | NM_001018065 | GAAUUGACGAUGGUGCAAAt  | UUUGCACCAUCGUCAAUUCca  | 74  |
| NTRK2 | NM_001018065 | GGUUAGAAAUCAUCAACGAt  | UCGUUGAUGAUUUCUAACct   | 146 |
| NTRK3 | NM_002530    | GGAAUAUCACUCCAUAACAt  | UGUAUGGAAGUGAUUUUCct   | 134 |
| NTRK3 | NM_002530    | CGGAUAACUUUAUCUUGUUt  | AACAAGAUAAAGUUUACCCgtg | 58  |
| NTRK3 | NM_002530    | GAUGUGGACUGGAUAGUCAAt | UGACUAUCCAGUCCACAUCag  | 135 |
| NUAK1 | NM_014840    | GCCCUUCGAUGGUUUCGAUtt | AUCGAAACCAUCGAAGGGCat  | 321 |
| NUAK1 | NM_014840    | CCAGUGUCAUCAGCGAUGAt  | UCAUCGCUGAUGACACUGGaa  | 285 |
| NUAK1 | NM_014840    | CACUCUUGUUUAUGGAACAt  | UGUCCAUAACAAGAGUGta    | 202 |
| NUAK2 | NM_030952    | CAACCACCCUCACAUCAUtt  | AAUGAUGUGAGGGUGGUUGag  | 117 |
| NUAK2 | NM_030952    | GCAUGACCAUAAGAUCCUAt  | UAGGAUCUUUUGGUCAUGCcc  | 71  |
| NUAK2 | NM_030952    | GCAAGAUCUGAUGCACAUAAt | UAUGUGCAUCAGAUCUUGctc  | 158 |
| OXSRI | NM_005109    | CGAGUGAAAGAAUCAUAUtt  | AUAUUGAUUCUUUCACUCGgg  | 102 |
| OXSRI | NM_005109    | GAACCUCAGUCAAAUCGAUtt | AUCGAUUUGACUGAGGUUCct  | 341 |
| OXSRI | NM_005109    | CCAAGAUCCAAUCAGUCUtt  | AGACUGAUUGGGAUCUUGGtt  | 177 |

|         |              |                        |                       |     |
|---------|--------------|------------------------|-----------------------|-----|
| PACSIN1 | NM_020804    | CACCUGAGCAGCAAAGAAtt   | UUCUUUUGCUGCUCAGGUGtg | 111 |
| PACSIN1 | NM_020804    | AGCAAUCGGUCACACCUGAtt  | UCAGGUGUGACCGAUUGCUcc | 333 |
| PACSIN1 | NM_020804    | CGUCUAUGCAACGACCUGAtt  | UCAGGUCGUUGCAUAGACGgt | 83  |
| PACSIN2 | NM_007229    | ACCCAUCCUUCAACCCUGAtt  | UCAGGGUUGAAGGAUGGGUct | 197 |
| PACSIN2 | NM_007229    | GGAGGUUCAGAAGCACCUAtt  | UAGGUGCUUCUGAACCUCCag | 182 |
| PACSIN2 | NM_007229    | AGAUGUUCUUAAGACCAAAtt  | UUUGGUCUUAAGAACAUCUtg | 342 |
| PACSIN3 | NM_016223    | GGAUGAGGAGUGGUCAGAUtt  | AUCUGACCACUCCUCAUCctg | 51  |
| PACSIN3 | NM_016223    | CAAGAAAAGCUACCACGCAtt  | UGCGUGGUAGCUUUUCUUGga | 109 |
| PACSIN3 | NM_016223    | CAAUCAGCCGGAAGAGAAtt   | UUCUCUUUCCGGCUGAUUGtc | 111 |
| PAK1    | NM_002576    | GCUCUGUCAAGCUAACUGAtt  | UCAGUUAGCUUGACAGAGCca | 226 |
| PAK1    | NM_002576    | CAGAGGUUGUGACACGAAAtt  | UUUCGUGUCACAACCUCUGgt | 222 |
| PAK1    | NM_002576    | GAAGGACCGAUUUUACCGAtt  | UCGGUAAAUCGGUCCUUCtt  | 163 |
| PAK2    | XM_001126110 | GAACUGAUCAUUAACGAGAtt  | UCUCGUUAAUGAUCAGUUCct | 120 |
| PAK2    | XM_001126110 | GGUGAUGAAAGAAUUGAAAtt  | UUUCAAUUCUUUCAUACCag  | 121 |
| PAK2    | XM_001126110 | CAGAGGUGGUUACACGGAAtt  | UUCGUGUAACCACCUCUGgt  | 92  |
| PAK3    | NM_002578    | CGAUUACUCCAAACUUCAtt   | UGGAAGUUUGGAGUAAUCGtg | 105 |
| PAK3    | NM_002578    | CAACCCAAGAAGGAAUUAAtt  | UUAUUCCUUCUUGGGUUGct  | 175 |
| PAK3    | NM_002578    | GCUACUUGGUGGGUGAUGAtt  | UCAUCACCCACCAAGUAGCta | 105 |
| PAK4    | NM_001014834 | GGGUGAAGCUGUCAGACUtt   | AAGUCUGACAGCUUCACCctg | 36  |
| PAK4    | NM_001014834 | ACACCAGGAUGAACGAGGAtt  | UCCUCGUUCAUCCUGGUGUgg | 110 |
| PAK4    | NM_001014834 | ACUAAGAGGUGAACAUGUAtt  | UACAUGUUCACCUCUAGUgt  | 126 |
| PAK6    | NM_020168    | AUCCAGAAGUUGUCAGUCAAtt | UGACUGACAACUUCUGGAUgt | 169 |
| PAK6    | NM_020168    | GGCUAUUCCGAAGCAUGUtt   | AACAUGCUUCGGAAUAGCctg | 136 |
| PAK6    | NM_020168    | GGACAGCUACGUGAAGAUtt   | AAUCUUCACGUAGCUGUCCag | 102 |
| PAK7    | NM_020341    | GGUGGAUUACGAUCGAGCAtt  | UGCUCGAUCGUAAUCCACctt | 175 |
| PAK7    | NM_020341    | GUUUUCCAGCGAAUCCGAUtt  | AUCGGAUUCGCUGGAAUActg | 273 |
| PAK7    | NM_020341    | GGAUUACCACCAUGACAAUtt  | AUUGUCAUGGUGGUAAUCCcg | 76  |
| PANK1   | NM_148977    | GCAACAUGAUGAGUAAAGAtt  | UCUUUACUCAUCAUGUUGCca | 169 |
| PANK1   | NM_148977    | CGCGUUGAAUGAGAACAAtt   | UAUGUUCUCAUUAACGCGca  | 371 |
| PANK1   | NM_148977    | GUACUGCCUUGAUAAACCAtt  | UGGGUUAUCAAGGCAGUACgg | 76  |
| PANK2   | NM_024960    | GAGCGACUUUGAUCACCAUtt  | AUGGUGAUCAAAGUCGCUctg | 175 |

|        |              |                        |                        |     |
|--------|--------------|------------------------|------------------------|-----|
| PANK2  | NM_024960    | GCAUAUGCUUUGGAUUUUtt   | AAUAAUCCAAAGCAUAUGCca  | 292 |
| PANK2  | NM_024960    | GGACGGUCACAGUGCUAUUtt  | AAUAGCACUGUGACCGUCCat  | 151 |
| PANK3  | NM_024594    | GCGAGAAUCUGUUAGUAAAAtt | UUUACUAACAGAUUCUCGCtt  | 89  |
| PANK3  | NM_024594    | CUCUCGUACUUUGAACCUAtt  | UAGGUUCAAGUACGAGAGct   | 65  |
| PANK3  | NM_024594    | GAUUUUUCGCACAAUUGGAAtt | UUCCAAUUGUGCGAAAAUctt  | 66  |
| PANK4  | NM_018216    | CCUUAUUUUUCGCAGAUAAAtt | UUAUCUGCGAAAAUUAAAGGca | 225 |
| PANK4  | NM_018216    | GGCCUACUAUUCAACGGUAtt  | UACCGUUGAAUAGUAGGCCag  | 166 |
| PANK4  | NM_018216    | GUGCCUUAUUUUUCGCAGAtt  | UCUGCGAAAAUUAAAGGCACat | 182 |
| PAPSS1 | NM_005443    | GGAUCGAUUCUGAAUAUGAtt  | UCAUAUUCAGAAUCGAUCCca  | 151 |
| PAPSS1 | NM_005443    | GCAUCGCAGAAGUUGCUAAtt  | UUAGCAACUUCUGCGAUGCgt  | 209 |
| PAPSS1 | NM_005443    | GGCUUAGUGUGCAUCACAAtt  | UUGUGAUGCACACUAAGCCag  | 221 |
| PAPSS2 | NM_001015880 | GGGUAGCUAUCUUACGAGAtt  | UCUCGUAAGAUAGCUACCCtc  | 154 |
| PAPSS2 | NM_001015880 | CAUUCGCAAAGGAUCGUGAtt  | UCACGAUCCUUUGCGAAUGga  | 209 |
| PAPSS2 | NM_001015880 | CCACCAAUGUAGUCUAUCAAtt | UGAUAGACUACAUUGGUGGat  | 477 |
| PASK   | NM_015148    | GAAUCUUGCUGACUAUACAtt  | UGUAUAGUCAGCAAGAUUCac  | 92  |
| PASK   | NM_015148    | CCUGGUUGCUAACGCACAAAtt | UUUGUCGUUAGCAACCAGGat  | 110 |
| PASK   | NM_015148    | GCCUAGACCUCUUCGCUUUtt  | AAAGCGAAGAGGUCUAGGCcg  | 287 |
| PBK    | NM_018492    | GACUAAUGGAUGAAGCUAAAtt | UUAGCUUCAUCCAUUAGUCtc  | 125 |
| PBK    | NM_018492    | CCCUGAGGCUUGUUACAUUtt  | AAUGUAACAAGCCUCAGGGtc  | 348 |
| PBK    | NM_018492    | GCACUAAUGAAGACCCUAAtt  | UUAGGGUCUUCAUUAGUGCat  | 156 |
| PCM1   | NM_006197    | CCGUGAUUCACUUAGAUCAtt  | UGAUCUAAGUGAAUCACGGtg  | 135 |
| PCM1   | NM_006197    | CAAAGACUCCACAUACGUUtt  | AACGUAUGUGGAGUCUUUGtt  | 130 |
| PCM1   | NM_006197    | CAGUAUGCCUGAUCCAGUAtt  | UACUGGAUCAGGCAUACUGct  | 136 |
| PCTK1  | NM_033018    | ACAUCGUUACGCUACAUGAtt  | UCAUGUAGCGUAACGAUGUtg  | 126 |
| PCTK1  | NM_033018    | CUUCAUCUUCGUAUCUUAtt   | UAAGAUACGGAAGAUGAAGtg  | 296 |
| PCTK1  | NM_033018    | CCAUAUUUGCACUAAAGGAtt  | UCCUUUAGUGCAAUAUGGaa   | 207 |
| PCTK2  | NM_002595    | CCAUUUGACCAACCAAUGAtt  | UCAUUGGUUGGUCAAAUGGtg  | 97  |
| PCTK2  | NM_002595    | GGGUACAUAUGCAACAGUAtt  | UACUGUUGCAUAUGUACCCtc  | 148 |
| PCTK2  | NM_002595    | GGAUCUCAAUUGGAGGAUUtt  | AAAUCCUCAUUGAGAUCGgt   | 203 |
| PCTK3  | NM_002596    | GCACUGAGACCAUUGAAGAtt  | UCUUCAAUUGGUCUCAGUGCgg | 122 |
| PCTK3  | NM_002596    | GCAGCAAACUGACGGAGAAtt  | UUCUCCGUCAGUUUGCUGCgc  | 141 |

|        |           |                        |                        |     |
|--------|-----------|------------------------|------------------------|-----|
| PCTK3  | NM_002596 | CCCUCACCCUGGUGUUUGAtt  | UCAAACACCAGGGUGAGGGac  | 171 |
| PDGFRA | NM_006206 | CUCUAGGAAUGACGGAUUAtt  | UAAUCCGUCAUUCUAGAGgt   | 87  |
| PDGFRA | NM_006206 | GGCCUUACUUUAUUGGAUUt   | AAUCCAUAAGUAAGGCtt     | 104 |
| PDGFRA | NM_006206 | CAUCAGAGCUGGAUCUAGAtt  | UCUAGAUC CAGCUCUGAUGtt | 53  |
| PDGFRB | NM_002609 | GAGCAACUUUGAUCAACGAtt  | UCGUUGAUCAAAGUUGCUCgg  | 128 |
| PDGFRB | NM_002609 | GGCUAGACACGGGAGAAUAtt  | UAUUCUCCCGUGUCUAGCCca  | 111 |
| PDGFRB | NM_002609 | GGAACGUGCUCAUCUGUGAtt  | UCACAGAUGAGCACGUUCct   | 107 |
| PDGFRL | NM_006207 | GAGCUUCGAUGUAAAGGGAtt  | UCCCUUUACAUCGAAGCUCta  | 256 |
| PDGFRL | NM_006207 | GAACGGACA UUGUUUAUGAtt | UCAUAAACAAUGUCCGUUCca  | 228 |
| PDGFRL | NM_006207 | CGAUGUAAAGGGAGUAGAAtt  | UUCUACUCCCUUUACAUCGaa  | 127 |
| PDIK1L | NM_152835 | GAAUGAAACAACUGAUUAAAtt | UUAUUCAGUUGUUUCAUUCgc  | 137 |
| PDIK1L | NM_152835 | GGGCGAAUGAAACAACUGAtt  | UCAGUUGUUUCAUUCGCCcat  | 128 |
| PDIK1L | NM_152835 | GAGUAUCUGUUGUCCAGGAtt  | UCCUGGACAACAGAUACUCat  | 104 |
| PDK1   | NM_002610 | CAGAUACUGUGAUACGGAUtt  | AUCCGUAUACAGUAUCUGta   | 152 |
| PDK1   | NM_002610 | GAGUCGCAUUUCAAUUAGAtt  | UCUAAUUGAAAUGCGACUCat  | 192 |
| PDK1   | NM_002610 | CAAACUGCAAUGUACUUGAtt  | UCAAGUACAUUGCAGUUUGga  | 319 |
| PDK2   | NM_002611 | AGAUCAACCUGCUUCCCGAtt  | UCGGGAAGCAGGUUGAUCUct  | 219 |
| PDK2   | NM_002611 | CAACCCAGCCCAUCCCAAAtt  | UUUGGGAUGGGCUGGGUUGgt  | 186 |
| PDK2   | NM_002611 | CAGCAAUGCCUGUGAGAAAtt  | UUUCUCACAGGCAUUGCUGga  | 162 |
| PDK3   | NM_005391 | GACUUAUCCAUAAGAUCAtt   | UGAUCUUAAUGGAUAAGUCtt  | 118 |
| PDK3   | NM_005391 | CCCUCGUUACUUUGGGUAAtt  | UUACCCAAAGUAACGAGGGtt  | 150 |
| PDK3   | NM_005391 | CAUAUAUGUUUCUACGAAAtt  | UUUCGUAGAAACAUAUAUGaa  | 163 |
| PDK4   | NM_002612 | GGAUGCUCUGUGAUCAGUAtt  | UACUGAUCACAGAGCAUCctt  | 118 |
| PDK4   | NM_002612 | GGGCAACAGUUGAACACCAtt  | UGGUGUUCAACUGUUGCCGgc  | 150 |
| PDK4   | NM_002612 | CCGCCUCUUUAGUUUAUACAtt | UGUAUAACUAAAGAGGGCGGtc | 242 |
| PDPK1  | NM_002613 | CGGUUAGGCUGUGAGGAAAtt  | UUUCCUCACAGCCUAACCGct  | 97  |
| PDPK1  | NM_002613 | GGAACAGCGCAGUACGUUUt   | AAACGUACUGCGCUGUUCcca  | 134 |
| PDPK1  | NM_002613 | GGGUUUUUUGCAAGACGAtt   | UCGUCUUGCAAUAAACCtt    | 139 |
| PDXK   | NM_003681 | CCGUGGUGAUGGAACGCAUtt  | AUGCGUUC CAUACCCACGGag | 46  |
| PDXK   | NM_003681 | GGAUGGACAUUCGCAAAGUtt  | ACUUUGCGAAUGUCCAUCgg   | 143 |
| PDXK   | NM_003681 | GGUUUAUACGAGGGACAAGUtt | ACUUGUCCCU CGUAUAACctg | 294 |

|        |           |                        |                       |     |
|--------|-----------|------------------------|-----------------------|-----|
| PFKL   | NM_002626 | GCACAAUACCGCAUCAGUAtt  | UACUGAUGCGGUUUGUGCca  | 156 |
| PFKL   | NM_002626 | CGUCACUGAGCUC AAGAAAtt | UUUCUUGAGCUCAGUGACGgg | 165 |
| PFKL   | NM_002626 | CAGUAUACGUGGUGCACGAtt  | UCGUGCACCACGUUACUGtg  | 188 |
| PFKM   | NM_000289 | GGACUUUCGGGAACGAGAAtt  | UUCUCGUUCCCGAAAGUCctt | 164 |
| PFKM   | NM_000289 | GCUCUAAACUUGGGACUAAtt  | UUAGUCCCAAGUUUAGAGCca | 137 |
| PFKM   | NM_000289 | GGAAGAAUGUGCUUGGUCAtt  | UGACCAAGCACAUUCUUCctg | 114 |
| PFKP   | NM_002627 | GAGCAAUUGAUACCCAAAAtt  | UUUUGGGUAUCAAUUGCUCct | 107 |
| PFKP   | NM_002627 | CCGCAUACAUUUUCGAAGAtt  | UCUUCGAAAUGUAUGCGGca  | 190 |
| PFKP   | NM_002627 | GGAUCACUGCAAAACUCAAtt  | UUGAGUUUUGCAGUGAUCCac | 139 |
| PFTK1  | NM_012395 | CCAACGAAGUGGUUACCUUtt  | AAGGUAACCACUUCGUUGGag | 114 |
| PFTK1  | NM_012395 | GGAAUGGACUCAGUGAUCAAtt | UGAUCACUGAGUCCAUCctt  | 92  |
| PFTK1  | NM_012395 | GGAUCAACUUGAACGAAUAtt  | UAUUCGUUCAAGUUGAUCCtg | 162 |
| PGK1   | NM_000291 | GGAACAAGGUUAAAGCCGAtt  | UCGGCUUUAACCUUGUUCcCa | 221 |
| PGK1   | NM_000291 | GCCUGACAAGUACUCCUUAtt  | UAAGGAGUACUUGUCAGGCat | 82  |
| PGK1   | NM_000291 | GAACGGAUCAGAUGUCUAUtt  | AUAGACAUCUGAUCCGUUCct | 316 |
| PGK2   | NM_138733 | GGAACUAGAUUACUUUGCUtt  | AGCAAAGUAAUCUAGUUCctt | 244 |
| PGK2   | NM_138733 | GCAUCCGGAUUCUUGAUGAtt  | UCAUCAAGAAUCCGGAUGctt | 128 |
| PGK2   | NM_138733 | GCCUUCGAGCAUCACUUUtt   | AAAGUGAUGCUCGGAAGGctt | 69  |
| PHKG1  | NM_006213 | GGAUGAUC AUGAGCGGCAAtt | UUGCCGCUCAUGAUCUCCtc  | 152 |
| PHKG1  | NM_006213 | GGACUUCUAUGAGAAUUUAtt  | AUAAUUCUCAUGAAGUCctg  | 160 |
| PHKG1  | NM_006213 | GCACAGGACUUCUAUGAGAtt  | UCUCAUGAAGUCCUGUGCag  | 227 |
| PHKG2  | NM_000294 | AAGGAAACCAGGUCCAUCAAtt | UGAUGGACCUGGUUCCCUtt  | 209 |
| PHKG2  | NM_000294 | AGAUCUGAUGUUACGCAUtt   | AUGCGUAACAUCAGGAUCUgc | 147 |
| PHKG2  | NM_000294 | GCACUGUCA AAGACCUGAUtt | AUCAGGUCUUUGACAGUGctg | 97  |
| PI4K2B | NM_018323 | GGUUAGUCAGAUACGAAAAtt  | UUUUCGUUUCUGACUAACCaa | 155 |
| PI4K2B | NM_018323 | CCUAUCUUGUGGACAACAAtt  | UUGUUGUCCACAAGAUAGGca | 152 |
| PI4K2B | NM_018323 | GAUUGACCGUGCAAAAUCAAtt | UGAUUUUGCACGGUCAAUcgc | 127 |
| PI4KII | NM_018425 | CAAAGAUUUCGGACCCUAtt   | UAGGGUCCGAUAUCUUUGGaa | 156 |
| PI4KII | NM_018425 | GAAGCUACUUCGUCAAGGAtt  | UCCUUGACGAAGUAGCUUCcg | 97  |
| PI4KII | NM_018425 | GCAUCGGGCUACCACCAAAtt  | UUUGGUGGUAGCCCGAUGCgg | 154 |
| PICK1  | NM_012407 | GGUGAGCACCGGCAACUAUtt  | AUAGUUGCCGGUGCUCACCcg | 95  |

|         |           |                        |                        |     |
|---------|-----------|------------------------|------------------------|-----|
| PICK1   | NM_012407 | GAUCUGAACACGUACCUCAtt  | UGAGGUACGUGUUCAGAUcgg  | 171 |
| PICK1   | NM_012407 | GCAGGUCAAUCAAGGGAAtt   | UCCCCUUUGAUUGACCUGCca  | 268 |
| PIK3AP1 | NM_152309 | GCAUUUUGCUGCGAAGUAUtt  | AUACUUCGCAGCAAAAUGCaa  | 122 |
| PIK3AP1 | NM_152309 | CAGAGACCCUUGAUAAACUtt  | AGUUUAUCAAGGGUCUCUGtg  | 54  |
| PIK3AP1 | NM_152309 | GGAAAUCUUAACGGCUAtt    | UAGCCGUUUAAGAUUUUCctg  | 131 |
| PIK3C2A | NM_002645 | GCCUACAACUUGAUAAAGAAtt | UUCUUAUCAAGUUGUAGGCct  | 204 |
| PIK3C2A | NM_002645 | GGAUCUUUUUAAACCUAUUtt  | AAUAGGUUUAAAAAGAUCctt  | 90  |
| PIK3C2A | NM_002645 | GGCUUUGAGUUGUCAAGCAtt  | UGCUGACAACUCAAGCCtc    | 206 |
| PIK3C2G | NM_004570 | CCAUCUACCAGCUAAUCAAtt  | UUGAUUAGCUGGUAGAUGGat  | 144 |
| PIK3C2G | NM_004570 | GUAGCAUUCUCAACAAAtt    | UUUGUUGGAGGAAUGCUACtt  | 149 |
| PIK3C2G | NM_004570 | GCUACUGGGUGGGAGUAUAtt  | UAUACUCCCACCCAGUAGCtg  | 419 |
| PIK3C3  | NM_002647 | GAGAUGUACUUGAACGUAAtt  | UUACGUUCAAGUACAUCUCat  | 143 |
| PIK3C3  | NM_002647 | GCAUGGAGAUGAUUUACGUtt  | ACGUAAAUCAUCUCAUGCtt   | 121 |
| PIK3C3  | NM_002647 | GCUUAGACCUGUCGGAUGAtt  | UCAUCCGACAGGUCUAAGCgg  | 75  |
| PIK3CA  | NM_006218 | GACUAGCUAGAGACAAUGAtt  | UCAUUGUCUCUAGCUAGUCtg  | 118 |
| PIK3CA  | NM_006218 | GUAUUUACCCAGAUCCUAUtt  | AUAGGAUCUGGGUAAUUCag   | 107 |
| PIK3CA  | NM_006218 | GGUGCACUGCAGUUCAACAtt  | UGUUGAACUGCAGUGCACctt  | 101 |
| PIK3CB  | NM_006219 | GUAAAUGAAUUUCGAAGAAtt  | UUCUUCGAAAUUCAUUUActt  | 106 |
| PIK3CB  | NM_006219 | CUCCAAAUGUUGCGCUUGAtt  | UCAAGCGCAACAUUUGGAGtg  | 272 |
| PIK3CB  | NM_006219 | GGGAAAGCUGGACUACUAAtt  | UUAGUAGUCCAGCUUUCctg   | 392 |
| PIK3CD  | NM_005026 | GUGAGAAUUUGAACGGUUtt   | AACCGUUCAAAUUUCUCActa  | 80  |
| PIK3CD  | NM_005026 | GACUAAUAAUAGUGAGAAAtt  | UUUCUCACUAUUUUUAGUCtt  | 115 |
| PIK3CD  | NM_005026 | GCACUUCGAGUGAAGUUUtt   | AAACUUCACUCGGAAGUGctt  | 116 |
| PIK3CG  | NM_002649 | GCUUUAGAGUCCAUUUGAtt   | UCAUAUGGAACUCUAAAGCtt  | 110 |
| PIK3CG  | NM_002649 | GCUGCACGACUUUACCCAAtt  | UUGGGUAAAGUCGUGCAGCat  | 117 |
| PIK3CG  | NM_002649 | GUAUUCGAGAUGUUACAAAtt  | UUUGUAACAUCUCGAUUUActt | 135 |
| PIK3R3  | NM_003629 | GGAUAUCAAUCGAGUACAAtt  | UUGUACUCGAUUGAUUUCctc  | 112 |
| PIK3R3  | NM_003629 | GAUCCGAGAUCAACACCUUtt  | AAGGUGUUGAUCUCGGAUCtt  | 159 |
| PIK3R3  | NM_003629 | GGAUUCGUCGUGAGAACUAUtt | AUAGUUCUCAGCAGCAUCctc  | 113 |
| PIK3R4  | NM_014602 | CCACCUAUCAGAUUCGAAUtt  | AUUCGAAUCUGAUAGGUGGat  | 260 |
| PIK3R4  | NM_014602 | GGAUCGUUUUACUCCAUAUtt  | AUAUGGAGUAAUACGAUCcaa  | 302 |

|         |           |                         |                        |     |
|---------|-----------|-------------------------|------------------------|-----|
| PIK3R4  | NM_014602 | CCACUACCAGAUCUAUUCUtt   | AGAAUAGAUCUGGUAGUGGtg  | 199 |
| PIK4CA  | NM_002650 | GACUAACAUUUUAUCUAGAUtt  | AUCUAGAUAAAUGUUAGUCtt  | 222 |
| PIK4CA  | NM_002650 | CAGUUCAUCUGGAACAUGAtt   | UCAUGUUC CAGAUGAACUGgt | 293 |
| PIK4CA  | NM_002650 | CUACCUGUCUUAUUUCAUAtt   | UAUGAAAUAAGACAGGUAGgg  | 144 |
| PIK4CB  | NM_002651 | CGAGAGUAUUGAUAAUUCAtt   | UGAAUUAUCAAUACUCUCGgt  | 138 |
| PIK4CB  | NM_002651 | GCACCGAGAGUAUUGAUAAtt   | UUAUCAAUACUCUCGGUGCtg  | 138 |
| PIK4CB  | NM_002651 | GCACUGUGCCCAACUAUGAtt   | UCAUAGUUGGGCACAGUGCtg  | 41  |
| PIM1    | NM_002648 | ACAUCCUUAUCGACCUCAAtt   | UUGAGGUCGAUAAGGAUGUtt  | 153 |
| PIM1    | NM_002648 | CCGUCUACACGGACUUCGAtt   | UCGAAGUCCGUGUAGACGGtg  | 140 |
| PIM1    | NM_002648 | CCUUCGAAGAAAUCCAGAAtt   | UUCUGGAUUUCUUCGAAGGtt  | 177 |
| PIM2    | NM_006875 | CUGC UUGACUGGUUUGAGAtt  | UCUCAACCAGUCAAGCAGgc   | 138 |
| PIM2    | NM_006875 | ACCUUCUUC CCGACCCUCAAtt | UGAGGGUCGGGAAGAAGGUtt  | 175 |
| PIM2    | NM_006875 | AGAACAUC CUGAUAGACCUtt  | AGGUCUAUCAGGAUGUUCUca  | 286 |
| PIM3    | XM_938171 | AUUUUAUUUGUUGAGGUUAUtt  | AUAACCUCAACAAAUAUUta   | 109 |
| PIM3    | XM_938171 | GCCCUUGGUGGAUACUUGAtt   | UCAAGUAUCCACCAGGGCag   | 104 |
| PIM3    | XM_938171 | GUCUGGAGAUCAUUUUUUtt    | AAAAUAUGAUCUCCAGACat   | 177 |
| PINK1   | NM_032409 | CCUCGUUAUGAAGAACUAUtt   | AUAGUUCUUCAUAACGAGGaa  | 151 |
| PINK1   | NM_032409 | ACAGAGACCUGAAAUCCGAtt   | UCGGAUUUCAGGUCUCUGUgc  | 131 |
| PINK1   | NM_032409 | GGAGCAGUCACUACAGAAtt    | UUCUGUAAGUGACUGCUCat   | 207 |
| PIP5K1A | NM_003557 | CUAGACUUCUACAAGACAtt    | UGUCUUGUAAGAAGUCUAGgt  | 114 |
| PIP5K1A | NM_003557 | GCAACUCCUGCAUUACUUAAtt  | UAAGUAAUGCAGGAGUUGCca  | 128 |
| PIP5K1A | NM_003557 | GGACUUUUGCUGCCUAAAUtt   | AAUUUAGGCAGCAAAGUCCga  | 55  |
| PIP5K1B | NM_003558 | CAGUGAACCUCUAAUAGAAtt   | UUCUAUUAGAGGUUCACUGca  | 149 |
| PIP5K1B | NM_003558 | GGCUC AACGUUAAGCGAAtt   | UUCGCUUAUACGUUGAGCCtt  | 120 |
| PIP5K1B | NM_003558 | GAUCAUGGAUUUAUAGCCUtt   | AAGGCUAUAUCCAUGAUctt   | 202 |
| PIP5K1C | NM_012398 | AGACCGUCAUGCACAAGGAtt   | UCCUUGUGCAUGACGGUCUtg  | 49  |
| PIP5K1C | NM_012398 | CAGUCCUACAGGUUCAUCAAtt  | UGAUGAAC CUGUAGGACUGca | 181 |
| PIP5K1C | NM_012398 | GCGUCGUGGUCAUGAACAAtt   | UUGUUCAUGACCACGACGcgg  | 122 |
| PIP5K2A | NM_005028 | CCGUGAACCCAGAACAGUAtt   | UACUGUUCUGGGUUCACGGtg  | 111 |
| PIP5K2A | NM_005028 | CACACUCCUACGACAAAAtt    | UUUUGUCGUAGGAAGUGUGaa  | 102 |
| PIP5K2A | NM_005028 | CCGGCUUA AUGUUGAUGGAtt  | UCCAUCAACAUUAAGCCGgta  | 267 |

|         |           |                       |                       |     |
|---------|-----------|-----------------------|-----------------------|-----|
| PIP5K2B | NM_003559 | GCUUUAGUUUAAGGAGUAtt  | UACUCCUUAACUUAAGCg    | 295 |
| PIP5K2B | NM_003559 | GGAGAUGCACAACUUCUAtt  | UAAGAUGUUGUGCAUCUCc   | 124 |
| PIP5K2B | NM_003559 | GCCCAGCCGCUUUAAGUUUtt | AAACUUAAGCGGCUGGGCag  | 183 |
| PIP5K2C | NM_024779 | GAAAGUAUAUAUUGGUGAAtt | UUCACCAUAUAUACUUUctg  | 171 |
| PIP5K2C | NM_024779 | GAACCUCGUGAUCGAUUUtt  | AAAUCGAUCACGGAGGUUCct | 203 |
| PIP5K2C | NM_024779 | GGAGCAGUAUGCUAAGCGAtt | UCGCUUAGCAUACUGCUCcgg | 211 |
| PIP5KL1 | NM_173492 | CAAGAUCAUUCAGCAAUAAtt | UUAUUGCUGAAUGAUCUUGat | 92  |
| PIP5KL1 | NM_173492 | GGAUUACAGCCUCCUGAUAtt | UAUCAGGAGGCUGUAAUCcag | 106 |
| PIP5KL1 | NM_173492 | AGCUCAACGUGCUGGAUUAtt | UAAUCCAGCACGUUGAGCUcc | 126 |
| PKLR    | NM_181871 | GCUUCUGUCUCGGUACCGAtt | UCGGUACCGAGACAGAAGctg | 166 |
| PKLR    | NM_181871 | GCUUUACCGUGAACCUCCAtt | UGGAGGUUCACGGUAAAGCaa | 41  |
| PKLR    | NM_181871 | GCAAAAUUGAGAACCACGAtt | UCGUGGUUCUCAUUUUUGctg | 237 |
| PKM2    | NM_182470 | GAUUAAGUCUGGAAUGAAUtt | AUUCAUUCAGACUAAUcat   | 97  |
| PKM2    | NM_182470 | CAUCAAGAUUAUCAGCAAAtt | UUUGCUGAUAAUCUUGAUGtt | 125 |
| PKM2    | NM_182470 | GGAAAGAACAUCAAGAUUAtt | UAAUCUUGAUGUUCUUUCct  | 187 |
| PKMYT1  | NM_004203 | CAGCGGAUGUGUUCAGUCUtt | AGACUGAACACAUCCGCUGct | 83  |
| PKMYT1  | NM_004203 | GGACAGCAGCGGAUGUGUUtt | AACACAUCCGCUGCUGUCCca | 154 |
| PKMYT1  | NM_004203 | GCGGUAAAGCGUUCCAUGUtt | ACAUGGAACGCUUUACCGcat | 288 |
| PKN1    | NM_213560 | GGACAGUAAGACCAAGAUUtt | AAUCUUGGUCUACUGUCctg  | 149 |
| PKN1    | NM_213560 | GCACUGUGCUUAAGCUGGAtt | UCCAGCUUAAGCACAGUGctg | 182 |
| PKN1    | NM_213560 | ACAGCGACGUGUUCUCUGAtt | UCAGAGAACACGUCGCUGUgg | 260 |
| PKN2    | NM_006256 | GACGAGAAGAUGUUAGUAAtt | UUACUAACAUCUUCUCGUCct | 146 |
| PKN2    | NM_006256 | GCACCCAUUUUUCCGGCUAtt | UAGCCGGAAAAUUGGGUGctt | 176 |
| PKN2    | NM_006256 | GGAUUCUCAAAGGAUCGGAtt | UCCGAUCCUUUGAAGAUCcat | 152 |
| PKN3    | NM_013355 | GGCUUGAGUUCAUUCAGAAtt | UUCUGAAUGAACUCAAGCCct | 96  |
| PKN3    | NM_013355 | GGAACGCAUCUUCUCUAAAtt | UUUAGAGAAGAUGCGUUCctg | 229 |
| PKN3    | NM_013355 | GGGCUUGAGUUCAUUCAGAtt | UCUGAAUGAACUCAAGCCctt | 248 |
| PLK1    | NM_005030 | CCAUUAACGAGCUGCUUAAtt | UUAAGCAGCUCGUUAAUGGtt | 70  |
| PLK1    | NM_005030 | CAACCAAAGUCGAAUAUGAtt | UCAUAUUCGACUUUGGUUGcc | 50  |
| PLK1    | NM_005030 | GCAAUUACAUGAGCGAGCAtt | UGCUCGCUCAUGUAAUUGCgg | 79  |
| PLK2    | NM_006622 | GCUAGUAUGUUGUCCAAAAtt | UUUUGGACAACAUACUAGCaa | 236 |



|         |           |                        |                        |     |
|---------|-----------|------------------------|------------------------|-----|
| PLK2    | NM_006622 | GGUUGAUUACUCUAACAAAtt  | UUUGUUAGAGUAAUCAACCca  | 350 |
| PLK2    | NM_006622 | CUACUUCGAGGACAAAGAAtt  | UUCUUUGUCCUCGAAGUAGtg  | 153 |
| PLK3    | NM_004073 | GCAUCAAGCAGGUUCACUAtt  | UAGUGAACCUUCUUGAUGCag  | 289 |
| PLK3    | NM_004073 | GGCUUUGGGUAUCAACUGUtt  | ACAGUUGAUACCCAAAGCCga  | 200 |
| PLK3    | NM_004073 | GUUCGGCUUUGGGUAUCAAtt  | UUGAUACCCAAAGCCGAActt  | 140 |
| PLK4    | NM_014264 | GGACCUUUAUUCACCAGUUAtt | UAACUGGUGAAUAAGGUCCtt  | 77  |
| PLK4    | NM_014264 | GGACUUGGUCUUACAACUAtt  | UAGUUGUAAGACCAAGUCCtt  | 143 |
| PLK4    | NM_014264 | GGAACGAUGUCACUCAGCAtt  | UGCUGAGUGACAUCGUUCCat  | 178 |
| PLXNA1  | NM_032242 | AGCGGGUGGUGAAACUCUAtt  | UAGAGUUUACACCACCGCUgg  | 108 |
| PLXNA1  | NM_032242 | CCAAAGGAGUCAGCACUGUtt  | ACAGUGCUGACUCCUUUGGtg  | 232 |
| PLXNA1  | NM_032242 | CCCUGAGAAUGAGAAUGCAtt  | UGCAUUCUCAUUCUCAGGGtt  | 237 |
| PLXNA2  | NM_025179 | GGCACUAUGGUGACCAUUAtt  | UAAUGGUCACCAUAGUGCctc  | 126 |
| PLXNA2  | NM_025179 | GGAUCGCCCAUCAUUCUGAtt  | UCAGAAUGAUGGGCGAUCctg  | 379 |
| PLXNA2  | NM_025179 | GGGAAGAUUUUGUCAGCAtt   | UGCUGACAAUAUCUUCCTg    | 112 |
| PLXNA3  | NM_017514 | CAGUGAACCGAGUCUUUAAtt  | UUAAGACUCGGUUCACUGcg   | 187 |
| PLXNA3  | NM_017514 | GCAGUGAACCGAGUCUUUAtt  | UAAAGACUCGGUUCACUGCgc  | 243 |
| PLXNA3  | NM_017514 | CAUCAUCAUUGGAAGCACUtt  | AGUGCUUCCAUUGAUGAUgct  | 134 |
| PLXNA4B | NM_181775 | UCGCAUAUGUCUACAAGAAAtt | UUCUUGUAGACAUUUGCGAtg  | 113 |
| PLXNA4B | NM_181775 | GCAGUGCUCUCUUAACCAUtt  | AUGGUUAAGAGCGCACUGctg  | 79  |
| PLXNA4B | NM_181775 | GGCCUUUGUGGGCACCAAAtt  | UUUGGUGCCCAAAAGGCCag   | 96  |
| PLXNB1  | NM_002673 | CGCGGACAGUUCAAGUAUAtt  | UAUACUUGAACUGUCCGCGtt  | 135 |
| PLXNB1  | NM_002673 | CAACUGCAUUCACUCCCAAtt  | UUGGGAGUGAAUGCAGUUGgt  | 82  |
| PLXNB1  | NM_002673 | CACCUUUGAUGGGACCUUtt   | AAAGGUCCCAUCAAAAGGUGag | 87  |
| PLXNB2  | XM_371474 | GAACGAGAGUAUGAGAAGAtt  | UCUUCUCAUACUCUCGUUCgg  | 69  |
| PLXNB2  | XM_371474 | CAACCACACUGUUGCUUUUtt  | AAAAGCAACAGUGUGGUUGtt  | 120 |
| PLXNB2  | XM_371474 | ACAUCUCCUCACGUCCUAtt   | UAGGACGUGAGGAAGAUGUtg  | 157 |
| PLXNB3  | NM_005393 | GGAAGAGACUCAACCCUtt    | AAGGUGUUGAGUCUCUCCag   | 107 |
| PLXNB3  | NM_005393 | CAGGUACUAUGAUCAGAUtt   | AAUCUGAUCAUAGUACCUtg   | 148 |
| PLXNB3  | NM_005393 | CUCUUUAUGUGAUCCUGUAtt  | UACAGGAUCACAUAAGAGca   | 409 |
| PLXNC1  | NM_005761 | CCACUAUAAAAGUCUUUAAtt  | UUAAGACUUUUUAUAGUGgat  | 109 |
| PLXNC1  | NM_005761 | GGGCAUCGAACAUCACAAUtt  | AUUGUGAUGUUCGAUGCCgg   | 199 |

|        |              |                         |                        |     |
|--------|--------------|-------------------------|------------------------|-----|
| PLXNC1 | NM_005761    | GGAGAAUUCGUGUUGCAAAtt   | UUUGCAACACGAAUUCUCctc  | 269 |
| PLXND1 | NM_015103    | CGAGUACCGGGUCAAGAUAtt   | UAUCUUGACCCGGUACUCGtg  | 104 |
| PLXND1 | NM_015103    | GCCAUCACAAUCCAGGUAtt    | UACCUUGAUUGUGAUGGGCag  | 163 |
| PLXND1 | NM_015103    | GCCUUUCAGUCAUCGCGCAtt   | UGC CGGAUGACUGAAAGGCag | 372 |
| PMVK   | NM_006556    | CAGUGUGGAUACUAAUAAAtt   | UUUAAUAGUAUCCACACUGgg  | 205 |
| PMVK   | NM_006556    | CGAGAACCAUGGAGUUGAAtt   | UUCAACUCCAUGGUUCUCGat  | 233 |
| PMVK   | NM_006556    | CCAGGCUUCUUUUGCAGGAtt   | UCCUGCAAAGAAGCCUGGgt   | 307 |
| PNCK   | NM_001039582 | GGAUGACAUCUCAGAAUCAAtt  | UGAUUCUGAGAUUGUCAUCCca | 87  |
| PNCK   | NM_001039582 | GCAGUGCUCCGUAGGAUCAAtt  | UGAUCCUACGGAGCACUGCga  | 157 |
| PNCK   | NM_001039582 | CGGAAGAACUUUGCUCGGAtt   | UCCGAGCAAAGUUCUCCGga   | 141 |
| PNKP   | NM_007254    | GGAGGAUCUUGUACCCAGAtt   | UCUGGGUACAAGAUCUCCag   | 202 |
| PNKP   | NM_007254    | GGAAGUCCACCUUUCUCAAtt   | UUGAGAAAGGUGGACUUCcag  | 116 |
| PNKP   | NM_007254    | CGAAGAAGCGUAUGC GGAAAtt | UUCCGCAUACGCUUCUUCGgc  | 377 |
| PRKAA1 | NM_006251    | GGAUCCAUCAUUAUAGUUCAtt  | UGAACUUAUUGAUUGGAUCctc | 421 |
| PRKAA1 | NM_006251    | GAGUCUACAGUUUAUACCAAtt  | UUGGUUAUAACUGUAGACUCat | 298 |
| PRKAA1 | NM_006251    | CGGGAUCAGUUAGCAACUAtt   | UAGUUGCUAACUGAUCCCGat  | 151 |
| PRKAA2 | NM_006252    | GAUUUCGGAUUAUCUAAUAtt   | UAUUAGAUAAUCCGAAAUCgg  | 181 |
| PRKAA2 | NM_006252    | GCAUAUGGUUGUUCUUCGAtt   | UCGAUGAACAAACCAUAUGCct | 177 |
| PRKAA2 | NM_006252    | GAUUCGCAGUUUAGAUGUAtt   | AACAUCUAAACUGCGAAUctt  | 170 |
| PRKACA | NM_002730    | CCUGCAAGCUGUCAACUUUtt   | AAAGUUGACAGCUUGCAGGat  | 132 |
| PRKACA | NM_002730    | CAAGGACAACUCAAAACUUAtt  | UAAGUUUGAGUUGUCCUUGaa  | 66  |
| PRKACA | NM_002730    | AGAUCGUCCUGACCUUUGAtt   | UCAAAGGUCAGGACGAUCUgg  | 71  |
| PRKACB | NM_207578    | GCUAUAUCCAGGUCACAGAtt   | UCUGUGACCUGGAUUAUGCct  | 78  |
| PRKACB | NM_207578    | GGAGUGC UAAUCUAUGAAAtt  | UUUCAUAGAUUAGCACUCctta | 61  |
| PRKACB | NM_207578    | CGAGUACCUCCAUUCACUAtt   | UAGUGAAUGGAGGUACUCGaa  | 187 |
| PRKACG | NM_002732    | GAAGCAGGUCGAGCACAUAtt   | UAUGUGCUCGACCUGCUUCat  | 140 |
| PRKACG | NM_002732    | CGGUUUCUCCUCCAAACUCAAtt | UGAGUUUGGAGGGAAACCGca  | 196 |
| PRKACG | NM_002732    | AGCACAUACUGAACGAGAAAtt  | UUCUCGUUCAGUAUGUGCUcg  | 132 |
| PRKCA  | NM_002737    | CAACGUACCCAUUCGGAAAtt   | UUCGGAAUUGGGUACGUUGta  | 143 |
| PRKCA  | NM_002737    | GCUCCACACUAAAUCCGCAtt   | UGC GGAAUUAGUGUGGAGCgg | 98  |
| PRKCA  | NM_002737    | GGCUGUACUUCGUCAUGGAtt   | UCCAUGACGAAGUACAGCCga  | 137 |

|         |              |                        |                        |     |
|---------|--------------|------------------------|------------------------|-----|
| PRKCB1  | NM_212535    | GGUCUGUUCUUCUUACAGAtt  | UCUGUAAGAAGAACAGACCga  | 174 |
| PRKCB1  | NM_212535    | GGAUGAAACUGACCGAUUUtt  | AAAUCGGUCAGUUUCAUCCgg  | 113 |
| PRKCB1  | NM_212535    | GAAUCGGACAAAGACAGAAtt  | UUCUGUCUUUGUCCGAUUCtt  | 115 |
| PRKCD   | NM_212539    | GGAUUAAAAGUGUGAAGACUtt | AGUCUUCACACUUUAAUCCct  | 76  |
| PRKCD   | NM_212539    | GGGACACUAUAUJCCAGAAtt  | UUCUGGAAUAUAGUGUCCCgg  | 132 |
| PRKCD   | NM_212539    | GGAGUGACCGGAAACAUCAtt  | UGAUGUUUCCGGUCACUCcCa  | 116 |
| PRKCDBP | NM_145040    | CGAAUCCUACAUCCACCAAtt  | UUGGUGGAUGUAGGAUUCGct  | 119 |
| PRKCDBP | NM_145040    | GCUUGUGCCUUGUCCCAAAtt  | UUUGGGACAAGGCACAAGCac  | 102 |
| PRKCDBP | NM_145040    | GCUCCAAAUGGAGAGUGUAtt  | UACACUCUCCAUUUGGAGCag  | 120 |
| PRKCE   | NM_005400    | GAGUGUAUGUGAUCAUCGAtt  | UCGAUGAUCACAUACACUCtt  | 156 |
| PRKCE   | NM_005400    | GGAAAGCAGGGAUACCAGUtt  | ACUGGUAUCCCUGCUUUCctA  | 206 |
| PRKCE   | NM_005400    | ACCACGCAUUAACCAAAtt    | UUUGGUUUUAAUUGCGUGGUtt | 114 |
| PRKCG   | NM_002739    | CCCGUAACCUAAUJCCUUAUtt | AUAGGAAUUAGGUUACGGGcc  | 124 |
| PRKCG   | NM_002739    | GGAACCUGACGAAACAGAAtt  | UUCUGUUUCGUCAGGUUCCga  | 85  |
| PRKCG   | NM_002739    | ACAAGUUACUGAACCCAGGAtt | UCCUGGUUCAGUAACUUGUac  | 76  |
| PRKCH   | NM_006255    | GGAUGAGUUUAGAAACUUUtt  | AAAGUUUCUAAACUCAUCctg  | 94  |
| PRKCH   | NM_006255    | GUCUCGUCGUUUUGAUGAAtt  | UUCAUCAAACGACGAGACTt   | 70  |
| PRKCH   | NM_006255    | CAAAGUGGAUUCAAAGAUUtt  | AAUCUUUGAAUCCACUUUGtt  | 90  |
| PRKCI   | NM_002740    | GAGACCUAAUGUUUCAUAUtt  | AUAUGAAACAUUAGGUCUCct  | 136 |
| PRKCI   | NM_002740    | GGAUUAUGAUGGAGCAAAAAtt | UUUUUGCUCCAUCAUAUCCca  | 107 |
| PRKCI   | NM_002740    | GUAAUJCCAUAUAUJCCUUAtt | AAGGAUUUAUUGGAAUUAActg | 87  |
| PRKCQ   | NM_006257    | GCGAGGCUGUUAACCCUUAtt  | UAAGGGUUAACAGCCUCGCcc  | 73  |
| PRKCQ   | NM_006257    | CGUUGGAUGAGGUGGAUAAtt  | UUAUCCACCUCAUCCAACGga  | 92  |
| PRKCQ   | NM_006257    | GCUGCUUAAGAGAUACUGAtt  | UCAGUAUCUCUUAAGCAGCga  | 84  |
| PRKCSH  | NM_002743    | GGAACAGACGAGUACAACAtt  | UGUUGUACUCGUCUGUUCcat  | 246 |
| PRKCSH  | NM_002743    | CCACCAACGAAUACGUCUAAtt | UAGACGUAUUCGUUGGUGGtg  | 114 |
| PRKCSH  | NM_002743    | UGACUAUJGCGACUGCAAAtt  | UUUGCAGUCGCAAUAGUCAtc  | 161 |
| PRKCZ   | NM_001033582 | CGUUCGACAUCAUCACCGAtt  | UCGGUGAUGAUGUCGAACGgg  | 190 |
| PRKCZ   | NM_001033582 | GGACUUUGACCUAAUCAGAtt  | UCUGAUUAGGUCAAAGUCctg  | 142 |
| PRKCZ   | NM_001033582 | CGAGGAUAUUGACUGGGUAtt  | UACCCAGUCAAUUJCCUCGtc  | 195 |
| PRKD1   | NM_002742    | CGAAGUUUUUAAUJACUCAAtt | UGAGUAAUUAACUUCGtt     | 147 |

|         |              |                        |                        |     |
|---------|--------------|------------------------|------------------------|-----|
| PRKD1   | NM_002742    | CCUCAUUGUUUCGAAAUCAtt  | UGAUUUCGAAACAAUGAGGat  | 92  |
| PRKD1   | NM_002742    | CAUCAUCUAUGUAAGCCUAtt  | UAGGCCUUACAUGAUGAUGac  | 86  |
| PRKD2   | NM_001079880 | CAGUGGGCGUGAUGAUGUAtt  | UACAUGAUCACGCCACUGac   | 146 |
| PRKD2   | NM_001079880 | GAACAACACGACCAACAGAtt  | UCUGUUGGUCGUGUUGUUCtg  | 171 |
| PRKD2   | NM_001079880 | AGAUGAUCCUGUCCAGUGAtt  | UCACUGGACAGGAUCAUCUcc  | 89  |
| PRKD3   | NM_005813    | GAACGAGUCUUUGUAGUAAtt  | UUACUACAAAGACUCGUUCtg  | 178 |
| PRKD3   | NM_005813    | GCCCGACUCUCUAAUGGAAtt  | UUCCAUUAGAGAGUCGGGcag  | 384 |
| PRKD3   | NM_005813    | CCACGAGAUUUCACAAACAtt  | UGUUUGUGAAAUCUCGUGGtg  | 171 |
| PRKDC   | NM_001081640 | GCGUUGGAGUGCUACAACAtt  | UGUUGUAGCACUCCAACGCgg  | 76  |
| PRKDC   | NM_001081640 | GCGCUUUUCUGGGUGAACUtt  | AGUUCACCCAGAAAAGCGCgg  | 149 |
| PRKDC   | NM_001081640 | CAAGCGACUUUAUAGCCUUt   | AAGGCUAUAAAGUCGCUUGaa  | 157 |
| PRKG1   | NM_006258    | GGAUAGAGGUUCGUUUGAAtt  | UUCAAACGAACCUCUAUCCct  | 140 |
| PRKG1   | NM_006258    | CGGUAAAUGUCACUCGUGAtt  | UCACGAGUGACAUUUACCGtt  | 50  |
| PRKG1   | NM_006258    | GAUCCUAUGAAAACCUAUAtt  | UAUAGGUUUUCAUAGGAUctg  | 77  |
| PRKG2   | NM_006259    | GCUAUGAAGUGUAUAAGGAtt  | UCCUUAUACACUUAUAGCaa   | 171 |
| PRKG2   | NM_006259    | GCCUGGUUAUAGAUCGAGAtt  | UCUCGAUCUAUAACCAGGCat  | 184 |
| PRKG2   | NM_006259    | GAGAUUACAUCAUUAGAGAtt  | UCUCUAAUGAUGUAAUCUCct  | 248 |
| PRKX    | NM_005044    | GGCGAUUAGGAAACAUGAAtt  | UUCAUGUUUCCUAAUCGCct   | 82  |
| PRKX    | NM_005044    | GAACAAGGCGAUUAGGAAAtt  | UUUCCUAAUCGCCUUGUUCtg  | 162 |
| PRKX    | NM_005044    | GCUCGUGGUUGACAGAACAtt  | UGUUCUGUCAACCACGAGCag  | 57  |
| PRKY    | NM_002760    | GAACUGGACUUUUUGAUUt    | AAUCAAAUAAGUCCAGUUCaa  | 215 |
| PRKY    | NM_002760    | UCACAGAGCCUAUUUUUUtt   | AAAUAUAUAGGCUCUGUGAag  | 120 |
| PRKY    | NM_002760    | CAAUGCAUUGUAUUCAGAAAtt | UUCUGAAUACAAUGCAUUGct  | 94  |
| PRPF4B  | NM_003913    | CAGUUGAUUUAAAGAGGUAAtt | UUACCUCUUAUUUCAACUGgg  | 89  |
| PRPF4B  | NM_003913    | GGAAAUAGGUCUAGUACUAtt  | UAGUACUAGACCUAUUUCcat  | 184 |
| PRPF4B  | NM_003913    | CCACGUGAUAAAUCAAGAAAtt | UUCUUGAUUUUAUCACGUGGtt | 399 |
| PRPS1   | NM_002764    | GCACUAUUGUCUCACCGUAtt  | UCAGGUGAGACAAUAGUGCag  | 148 |
| PRPS1   | NM_002764    | GAACUGCACUAUUGUCUCAtt  | UGAGACAAUAGUGCAGUUCct  | 87  |
| PRPS1   | NM_002764    | GACUUUGCCUUGAUUCACAtt  | UGUGAAUCAAGGCAAAGUCca  | 84  |
| PRPS1L1 | NM_175886    | GCAUUGCUCCAAAUAACGAtt  | UCGUUUUUUGGAGCAAUGCct  | 212 |
| PRPS1L1 | NM_175886    | GACUUUGCUUUGAUUCAUAtt  | UAUGAAUCAAGCAAAGUCca   | 197 |

|         |              |                         |                        |     |
|---------|--------------|-------------------------|------------------------|-----|
| PRPS1L1 | NM_175886    | GGACCUACAUGCUUCAAtt     | UUGAGAAGCAUGUAGGUCCat  | 115 |
| PRPS2   | NM_001039091 | CCAAGAUUCAGGUCAUUGAtt   | UCAAUGACCUGAAUCUUGGtg  | 164 |
| PRPS2   | NM_001039091 | GGGUUACAUCAAUUGCAGAtt   | UCUGCAAUUGAUGUAACCCtt  | 188 |
| PRPS2   | NM_001039091 | AGGCUGUUGUCGUCACAAAtt   | UUUGUGACGACAACAGCCUca  | 148 |
| PRPSAP1 | NM_002766    | CAAUGUCCCAAGAUAAAGAtt   | UCUUUAUCUUGGGACAUUGca  | 109 |
| PRPSAP1 | NM_002766    | CGAUAACUGUAGUUGGAGAtt   | UCUCCAACUACAGUUAUCGgt  | 134 |
| PRPSAP1 | NM_002766    | GCAUCGCAAUCAUCGUGGAtt   | UCCACGAUGAUUGCGAUGCgg  | 204 |
| PRPSAP2 | NM_002767    | CAAGAGUACAAAUUCAAGAtt   | UCUUGAAUUUGUACUCUUGtt  | 176 |
| PRPSAP2 | NM_002767    | CAAUCACGGUUGUGGGUGAtt   | UCACCCACAACCGUGAUUGgg  | 144 |
| PRPSAP2 | NM_002767    | GUAUGGAGCUAUCAAAGAAtt   | UUCUUUGAUAGCUCCAUAACat | 93  |
| PSKH1   | NM_006742    | ACCGAGACCUCAAACCUGAtt   | UCAGGUUUGAGGUUCUCGGUgt | 250 |
| PSKH1   | NM_006742    | GCACUAAGAGUGACGUGUAtt   | UACACGUCACUCUUAGUGCca  | 234 |
| PSKH1   | NM_006742    | GGUGAUGACUGCUUGAUGAtt   | UCAUCAAGCAGUCAUCACCct  | 132 |
| PSKH2   | NM_033126    | GGACUUUAUAGACAAACUAtt   | UAGUUUGUCUAUAAAGUCctt  | 65  |
| PSKH2   | NM_033126    | CCAGGUGAAGAGUCGAAAAtt   | UUUUCGACUCUUCACCUGGat  | 87  |
| PSKH2   | NM_033126    | GGAUCUGCACAGUCUUCUAtt   | UAGAAGACUGUGCAGAUCcag  | 84  |
| PTCD2   | NM_024754    | GAUACCUACUACAGAUAAAtt   | UUAUCUGUAAGUAGGUUUCtt  | 166 |
| PTCD2   | NM_024754    | CAGUCAAAUAUGUUGGAAAAtt  | UUUCCAACAUUUUGACUGgga  | 139 |
| PTCD2   | NM_024754    | GACUCCACAUCAUCAAUAtt    | UAUUGAAUGAUGUGGAGUctg  | 193 |
| PTK2    | NM_153831    | CGAUUAUUGGAAGAUAGUAtt   | UACUAUCUUCCAUAUAUCGgg  | 121 |
| PTK2    | NM_153831    | GAUGUUGGUUUAAAGCGAUtt   | AUCGCUUUAAACCAACAUCtt  | 113 |
| PTK2    | NM_153831    | GGUCGAAUGAUAAAGGUGUAtt  | UACACCUUAUCAUUCGACCgg  | 210 |
| PTK2B   | NM_173176    | GUGAAGAUGUGGUCCUGAAtt   | UUCAGGACCACAUCUUCACgg  | 248 |
| PTK2B   | NM_173176    | GAUGUGGUCCUGAAUCGUAtt   | UACGAUUCAGGACCACAUCtt  | 102 |
| PTK2B   | NM_173176    | GGAUCAUCAUGGAAUUGUAtt   | UACAAUCCAUGAUGAUCcag   | 126 |
| PTK6    | NM_005975    | CAUCCAUGGUUAAGUCAUAtt   | UAUGACUUAACCAUGGAUGgaa | 140 |
| PTK6    | NM_005975    | GGUUUUGACUCACCUGAAAAtt  | UUUCAGGUGAGUCAAAACCaa  | 88  |
| PTK6    | NM_005975    | CCGCGACUCUGAUGAGAAAAtt  | UUUCUCAUCAGAGUCGCGGag  | 187 |
| PTK7    | NM_002821    | GCACAAGUGAUAAAGAUAGCAtt | UGCAUCUUAUCACUUGUGctg  | 112 |
| PTK7    | NM_002821    | GGAUGAAAAAUUGAAGUCAtt   | UGACUUCAAUUUUUCAUCctt  | 103 |
| PTK7    | NM_002821    | GGAUUCCAAGAGCAAGGAtt    | UCCUUGCUCUUGGAAAUCctc  | 74  |

|       |           |                         |                        |     |
|-------|-----------|-------------------------|------------------------|-----|
| PXK   | NM_017771 | CGGAAUUAUUAUUCGAGUtt    | ACUCGAAUAAUUAUUCGtg    | 230 |
| PXK   | NM_017771 | GGAUCUGAUCUACAAGGCAtt   | UGCCUUGUAGAUCAGAUCctt  | 141 |
| PXK   | NM_017771 | GACAUAGGUUGGAGAAUAAtt   | UUAUUCUCCAACCUAUGUctt  | 163 |
| RAF1  | NM_002880 | GGAACUGUUUAUAAGGGUAtt   | UACCCUUAUAAACAGUUCcAa  | 181 |
| RAF1  | NM_002880 | GGAUUUCGAUGUCAGACUUt    | AAGUCUGACAUCGAAAUCcAt  | 48  |
| RAF1  | NM_002880 | CGUGUUUUCUUGCCGAACAtt   | UGUUCGGCAAGAAAACACGga  | 342 |
| RAGE  | NM_014226 | GGAAUACCUCUACUAACAAtt   | UUGUUAGUAGAGGUAUUCctg  | 471 |
| RAGE  | NM_014226 | CACUAAUAUGUGAACUUAUUt   | AUAAGUUCACAUUUAGUGca   | 104 |
| RAGE  | NM_014226 | CCUGGAUCAUAUUCACAGAtt   | UCUGUGAAUAUGAUCCAGGga  | 167 |
| RBKS  | NM_022128 | GAAUUUACAUUUCAGACUAtt   | UAGUCUGAUUGUAAAUUCtg   | 123 |
| RBKS  | NM_022128 | GGUGGUAAUCAUUACCUUAtt   | UAAGGUAAUGAUUACCACctg  | 297 |
| RBKS  | NM_022128 | GAUUGCUAUUAGUCCCAAAtt   | UUUGGGACUAAUAGCAAUCaa  | 291 |
| RET   | NM_020630 | GCUUGUCCCGAGAUGUUUAtt   | UAAACAUCUCGGGACAAGCcg  | 202 |
| RET   | NM_020630 | GGAUUGAAAACAAACUCUAtt   | UAGAGUUUGUUUCAAUCcAt   | 101 |
| RET   | NM_020630 | CCACUGCUACCACAAGUUUUt   | AAACUUGUGGUAGCAGUGGat  | 189 |
| RFK   | NM_018339 | GAGUUACCAGAACAUUUGAtt   | UCAAAGUUUCUGGUAAUCUta  | 160 |
| RFK   | NM_018339 | CCAUAUUACAAGAAUACGAtt   | UCGUAUUCUUGUAAUAUGGgt  | 212 |
| RFK   | NM_018339 | GGAUUGGAACCCAUAUUACAAtt | UGUAAUAUGGGUCCAUCctA   | 310 |
| RIOK1 | NM_031480 | GCGAGCAUAUAUUCCUAGAtt   | UCUAGGAAUAUAUGCUCGctt  | 182 |
| RIOK1 | NM_031480 | GGUGGAGGCGUGUAUAUACAtt  | UGAUUAACACGCCUCCACCgt  | 281 |
| RIOK1 | NM_031480 | GGUCAUUCAGUACAUGAGAtt   | UCUCAUGUACUGAAUGACctg  | 220 |
| RIOK2 | NM_018343 | GAACCUCGUUUCGAAAUUUt    | AAAUUUCGAAACGAGGUUCctt | 263 |
| RIOK2 | NM_018343 | GGAAGAACCUCGUUUCGAAtt   | UUCGAAACGAGGUUCUUCctA  | 176 |
| RIOK2 | NM_018343 | GGUUGACAAAUGCAGGAUAtt   | UAUCCUGCAUUUGUCAACCga  | 117 |
| RIOK3 | NM_003831 | GGUUGAUCGAUGUCAGUCAtt   | UGACUGACAUCGAUCAACCag  | 184 |
| RIOK3 | NM_003831 | CAACAGUUGUACUACUGAAtt   | UUCAGUAGUACAACUGUUGga  | 216 |
| RIOK3 | NM_003831 | GAUCGCUUCAGUAAACUAAtt   | UUAGUUUACUGAAGCGAUctt  | 199 |
| RIPK1 | NM_003804 | CCACUAGUCUGACGGAUAAAtt  | UUAUCCGUCAGACUAGUGGta  | 86  |
| RIPK1 | NM_003804 | GUGUAGAAGAGGACGUGAAtt   | UUCACGUCCUCUUCUACACTt  | 240 |
| RIPK1 | NM_003804 | GCAAAGACCUUACGAGAAUtt   | AUUCUCGUAAAGGUCUUUGctg | 205 |
| RIPK2 | NM_003821 | GCACGAUAUAUAUAGCUAUtt   | AUAGCUAUAUAUAUCGUGctt  | 457 |

|              |              |                        |                        |     |
|--------------|--------------|------------------------|------------------------|-----|
| RIPK2        | NM_003821    | GUAUGAUCUCUCUAAUAGAtt  | UCUAUUAGAGAGAUCAUACgt  | 353 |
| RIPK2        | NM_003821    | GCACGUAUGAUCUCUCUAAtt  | UUAGAGAGAUCAUACGUGCtc  | 173 |
| RIPK3        | NM_006871    | GGCAAGUCUGGAUAACGAAtt  | UUCGUUAUCCAGACUUGCCat  | 138 |
| RIPK3        | NM_006871    | GAACUGUUUGUUAACGUAAAtt | UUACGUUAACAAACAGUUCtg  | 230 |
| RIPK3        | NM_006871    | GGAGAACCAUAGAAAACCAAtt | UGGUUUUCUAUUGGUUCUCcta | 290 |
| RIPK4        | NM_020639    | UGGGAUCUCCGGUUCGAAtt   | UUCGGAACCGGAGAUCCCAtg  | 138 |
| RIPK4        | NM_020639    | CCGAUGUCAUUGACCUGUUt   | AACAGGUCAAUGACAUCGGcg  | 86  |
| RIPK4        | NM_020639    | GCACGAUGUAUACAGCUUUt   | AAAGCUGUAUACAUCGUGCtt  | 402 |
| RIPK5        | NM_015375    | GGGUCGUCAGUUACAAGGAtt  | UCCUUGUAACUGACGACCtg   | 96  |
| RIPK5        | NM_015375    | GUCUGGAAUAUACUCGAAAtt  | UUUCGAGUAUUAUCCAGACgt  | 302 |
| RIPK5        | NM_015375    | GCUUUGGAAUUUCACUAUAtt  | UAUAGUGAAAUCCAAAGCca   | 232 |
| RNASEL       | NM_021133    | GGUAAGGUCAAAGCCCUAAtt  | UUAGGGCUUUGACCUUACCat  | 152 |
| RNASEL       | NM_021133    | CGACAUCAAAACACGAAAAtt  | UUUUCGUGUUUUGAUGUCGga  | 257 |
| RNASEL       | NM_021133    | GGAAGUCUCUUGUCUGCAAtt  | UUGCAGACAAGAGACUUCcgcg | 153 |
| ROCK1        | NM_005406    | GGUUAGAACAAGAGGUAAAtt  | UUUACCUCUUGUUCUAACCgt  | 131 |
| ROCK1        | NM_005406    | CGGUUAGAACAAGAGGUAAAtt | UUACCUCUUGUUCUAACCGtt  | 102 |
| ROCK1        | NM_005406    | GCUUGUAGGUGAUACACCUtt  | AGGUGUAUCACCUACAAGCat  | 165 |
| ROCK2        | NM_004850    | GGAGAUUACCUUACGGAAAAtt | UUUCCGUAAGGUAAUCUCctc  | 126 |
| ROCK2        | NM_004850    | GAGAUUACCUUACGGAAAAtt  | UUUCCGUAAGGUAAUCUCct   | 192 |
| ROCK2        | NM_004850    | GGAUCGAACCCAUGGAUCAAtt | UGAUCCAUGGGUUCGAUCCct  | 349 |
| ROR1         | NM_001083592 | GUACUGCGAUGAAACUUCAtt  | UGAAGUUUCAUCGCAGUACgg  | 102 |
| ROR1         | NM_001083592 | GGAUGAAAACUUAAGUCUtt   | AGACUUAAGUUUUAUCCaa    | 105 |
| ROR1         | NM_001083592 | CCGUCUAUAUGGAGUCUUUt   | AAAGACUCCAUAUAGACGGtg  | 158 |
| ROR2         | NM_004560    | GACAGAAUAUGGUUCACGAtt  | UCGUGAACCAUAUUCUGUCtt  | 204 |
| ROR2         | NM_004560    | GGAUUACAGAGGAACGGCAtt  | UGCCGUUCCUCUGUAAUCCat  | 78  |
| ROR2         | NM_004560    | UGGAGGUUCUGGAUCCGAAtt  | UUCGGAUCCAGAACCUCAct   | 101 |
| ROS1         | NM_002944    | CUUCUACUUAUUUGCGUAtt   | UACGCAAAUAAGUAAGAAGgt  | 143 |
| ROS1         | NM_002944    | GGUUGGAUGCUAUAUACCAAtt | UGGUAAUAAGCAUCCAACCga  | 264 |
| ROS1         | NM_002944    | CUACUACAGUGACACGAAAAtt | UUUCGUGUCACUGUAGUAGag  | 154 |
| RP11-145H9.1 | NM_001012418 | GCGAAUAAGUGCAAGCGAAtt  | UUCGCUUGCACUUAUUCGCca  | 151 |
| RP11-145H9.1 | NM_001012418 | GCAUCAUCGAUGAGAGCUAtt  | UAGCUCUCAUCGAUGAUGCgg  | 124 |

|              |              |                        |                        |     |
|--------------|--------------|------------------------|------------------------|-----|
| RP11-145H9.1 | NM_001012418 | GAAUCGGGAUGCUAAGCAAtt  | UUGCUUAGCAUCCCGAUUCac  | 152 |
| RP2          | NM_006915    | GCGAGAAGGUUGAUCCAAAtt  | UUUGGAUCAACCUUCUCGcgc  | 164 |
| RP2          | NM_006915    | CCAUUGAUGACUGUACUAAtt  | UUAGUACAGUCAUCA AUGGta | 112 |
| RP2          | NM_006915    | GCAGCGUGUUUUUCCGGAAtt  | UUCCGGAAAAACACGCUGCct  | 176 |
| RP6-213H19.1 | NM_001042453 | GAUAGAUCGUUUUAAGAGAtt  | UCUCUAAAACGAUCUAUCag   | 114 |
| RP6-213H19.1 | NM_001042453 | GAAGAACUCGAGAAAAGUAtt  | UACUUUUCUCGAGUUCUUCaa  | 115 |
| RP6-213H19.1 | NM_001042453 | GCUUUACCACCGUACGAAAtt  | UUUCGUACGGUGGUAAAGCtc  | 212 |
| RPS6KA1      | NM_001006665 | CACUGAUUCUGAAGGCGAAtt  | UUCGCCUUCAGAAUCAGUGtc  | 158 |
| RPS6KA1      | NM_001006665 | ACGGCUACGUGGUAAAAGGAtt | UCCUUUACCACGUAGCCGUca  | 184 |
| RPS6KA1      | NM_001006665 | CAUUGACUGGAAUAAGCUAtt  | UAGCUUAUUCAGUCA AUGgt  | 315 |
| RPS6KA2      | NM_001006932 | CGAUUUCUGACGCAGCUAAtt  | UUAGCUCGUCAGAUUUCGag   | 88  |
| RPS6KA2      | NM_001006932 | CGAGCUCUCUCAAACGGAtt   | UCCGUUUGAAGAGAGCUCGca  | 90  |
| RPS6KA2      | NM_001006932 | GAGUAUGCCGUGAAGAUCAAtt | UGAUCUUCACGGCAUACUCgg  | 77  |
| RPS6KA3      | NM_004586    | GAGAUUUGUUUACACGCUUtt  | AAGCGUGUAAACAAUUCUCct  | 283 |
| RPS6KA3      | NM_004586    | GCGCAGAGUCUUUACGAAtt   | UUCGUAAAAGACUCUGCGCtt  | 112 |
| RPS6KA3      | NM_004586    | GGAUGCACCACAUCUAGUAtt  | UACUAGAUGUGGUGCAUCctg  | 103 |
| RPS6KA4      | NM_003942    | CCUCCAUUCUCUUGACCAAtt  | UGGUCAAAGAGAAUGGAGGgt  | 67  |
| RPS6KA4      | NM_003942    | GCACUUCAGCGAGUCGGAAtt  | UUCCGACUCGCUGAAGUGCcg  | 261 |
| RPS6KA4      | NM_003942    | UCAUUUACCGAGACCUGAAtt  | UUCAGGUCUCGGUAAAUGAtg  | 174 |
| RPS6KA5      | NM_182398    | GCUUUAGCGAAAGACCUAAtt  | UUAGGUCUUUCGCUAAAGCac  | 96  |
| RPS6KA5      | NM_182398    | GCUGAGAUUUCUAGGAGAAtt  | UUCUCCUAGAUUUCUCAGCtt  | 195 |
| RPS6KA5      | NM_182398    | GGAAUAACAGCUCUGAAAtt   | UUUCAGAGCUGUUUUUCctt   | 335 |
| RPS6KA6      | NM_014496    | GGAGAGUUACUUGACCGUAtt  | UACGGUCAAGUACUCUCctc   | 78  |
| RPS6KA6      | NM_014496    | GAGAGUUACUUGACCGUAUtt  | AUACGGUCAAGUACUCUCct   | 82  |
| RPS6KA6      | NM_014496    | GGCUAGUGAUUACUAUAUtt   | AUAUAGUAUAUCACUAGCctc  | 71  |
| RPS6KB1      | NM_003161    | CAUGGAACAUUGUGAGAAAtt  | UUUCUCACAAUGUCCAUGcc   | 172 |
| RPS6KB1      | NM_003161    | GGUUUUUCAAGUACGAAAAtt  | UUUUCGUACUUGAAAAACctt  | 89  |
| RPS6KB1      | NM_003161    | GGACUAUGCAAAGAAUCUAAtt | UAGAUUCUUUGCAUAGUCCaa  | 109 |
| RPS6KB2      | NM_003952    | ACAUCAAACUGACCGACUtt   | AAGUCGGUCAGUUUGAUGUgg  | 208 |
| RPS6KB2      | NM_003952    | CCUUUUUCCGGCACAUAtt    | UCAUGUGCCGGAAAAAGGgat  | 73  |
| RPS6KB2      | NM_003952    | GCAAGGAGUCUAUCCAUGAtt  | UCAUGGAUAGACUCCUUGCag  | 267 |



|         |              |                        |                       |     |
|---------|--------------|------------------------|-----------------------|-----|
| RPS6KC1 | NM_012424    | GGAAUGGUGUUGAUACAAAtt  | UUUGUAUCAACACCAUUCcct | 74  |
| RPS6KC1 | NM_012424    | GGCAAACUGUGGUCAUAUAtt  | UAUAUGACCACAGUUUGCCac | 141 |
| RPS6KC1 | NM_012424    | CAAUCCUAUAGUAUAACAtt   | UGUUUAUCUAUAGGAUUUGgg | 265 |
| RPS6KL1 | NM_031464    | ACUCAUCUCAGGACACUGAtt  | UCAGUGUCCUGAGAUGAGUct | 146 |
| RPS6KL1 | NM_031464    | CGAUGUUAGUGAGGACUAUtt  | AUAGUCCUCACUAACAUCGcg | 94  |
| RPS6KL1 | NM_031464    | GGUACUUUGUGAGCGAGGAtt  | UCCUCGCUCACAAAGUACcTg | 153 |
| RYK     | NM_001005861 | GGUGAAGGAUAUAGCAAUAtt  | UAUUGCUAUAUCCUUCACcTt | 43  |
| RYK     | NM_001005861 | GAAAGAUGGUUACCGAAUAtt  | UAUUCGGUAACCAUCUUUCag | 143 |
| RYK     | NM_001005861 | GAAUUGACCUUAUUGUCAtt   | UGACUAAUAAGGUCAUUUCtc | 122 |
| SBK1    | XM_937568    | GGUCUUUGACGUGGUCUUUtt  | AAAGACCACGUCAAAGACcTt | 70  |
| SBK1    | XM_937568    | CAAGGGCACAGGCACAAAAtt  | UUUUGUGCCUGUGCCCUUGta | 66  |
| SBK1    | XM_937568    | GCUACGUCUUUGCCCAGGAtt  | UCCUGGGCAAAGACGUAGCag | 196 |
| SCGB2A1 | NM_002407    | CCGACAUAUUCUAUACCUGAtt | UCAGGUUAUGAUUUGUCGgaa | 173 |
| SCGB2A1 | NM_002407    | ACAUAUCUAUACCUGAAUAtt  | UAUUCAGGUUAUGAUUUGUcg | 84  |
| SCGB2A1 | NM_002407    | AAGAGUUCUAUGACAGUGAtt  | UCACUGUCUAUGAACUCUUGa | 187 |
| SCYL1   | NM_001048218 | CGACCACAAAUCCUCCAAAtt  | UUUGGAGGAUUUGUGGUCGga | 193 |
| SCYL1   | NM_001048218 | GAGUAUCAGCAGAAGAUCAtt  | UGAUCUUCUGCUGAUACUCct | 256 |
| SCYL1   | NM_001048218 | GUCUCACUGUAGAUCUGAtt   | UCAGGAUCUACAGUGAGAcg  | 235 |
| SCYL2   | NM_017988    | GCAUGAACCGUUAUCACAtt   | UGUGAUAACUGGUUCAUGCta | 159 |
| SCYL2   | NM_017988    | GGAUCAGUUGAGUCGUUUAtt  | UAAACGACUCAACUGAUCCaa | 258 |
| SCYL2   | NM_017988    | GUCUGAACAUAGACUAAAAtt  | UUUAGUCUUAUGUUCAGActc | 97  |
| SCYL3   | NM_181093    | GAAUUCACCAUUAAGUAAAtt  | UUACUUGAAUGGUGAAUUCct | 191 |
| SCYL3   | NM_181093    | GCACCUUACUAUCUCAUGAtt  | UCAUGAGAUAGUAAGGUGCag | 166 |
| SCYL3   | NM_181093    | CAACAGACCUUGCACUCAAtt  | UUGAGUGCAAGGUCUGUUGaa | 50  |
| SGK     | NM_005627    | CAAUCCUAUGCUAAACCAtt   | UGGUUUAGCAUGAGGAUUGga | 160 |
| SGK     | NM_005627    | CAGCUGAAAUGUACGACAAtt  | UUGUCGUACAUUUCAGCUGtg | 159 |
| SGK     | NM_005627    | GGCUACCUGCAUUCACUGAtt  | UCAGUGAAUGCAGGUAGCCca | 239 |
| SGK2    | NM_170693    | CUCCACCCUUAACCCAAAtt   | UUUGGGUUGAAGGGUGGAGtt | 69  |
| SGK2    | NM_170693    | AGAGCCUUAUGAUCGAGCAtt  | UGCUCGAUCAUAAGGCUCUtt | 159 |
| SGK2    | NM_170693    | GCAGUGAAGGUACUACAGAtt  | UCUGUAGUACCUUCACUGCat | 313 |
| SGK269  | XM_370878    | CAUUGUCUCCUGUUCGAUUt   | AAUCGAACAGGAGACAAUGtg | 234 |

|         |              |                        |                        |     |
|---------|--------------|------------------------|------------------------|-----|
| SGK269  | XM_370878    | GUCAAGAUCUGUAAGAGCAtt  | UGCUCUUACAGAUCUUGACTg  | 75  |
| SGK269  | XM_370878    | GCAUGAUAGGUGGGAAUAAAtt | UUUAUCCCACCUAUCAUGCaa  | 103 |
| SGK3    | NM_001033578 | GAGCAUUCUUCAAAUGGAtt   | UCCAUUUGAAGGAAUGCUCtg  | 141 |
| SGK3    | NM_001033578 | GAGCAGGACUAAACGAAUUt   | AAUUCGUUUAGUCCUGCUCgt  | 324 |
| SGK3    | NM_001033578 | CAUUAUUCUUCCAAACAAtt   | UUGUUUGGAAGGAAUAAUGca  | 80  |
| SH3BP4  | NM_014521    | GCGGUUUGAUUGAUAAUCUtt  | AGAUUAUCAAUCAUACCGCtg  | 141 |
| SH3BP4  | NM_014521    | GAGACGAGCUUUAAUGACAtt  | UGUCAUUAAGCUCGUCUCtg   | 66  |
| SH3BP4  | NM_014521    | GCGUAUGACUUCUACUCAtt   | UGAGUAAGAAGUCAUACGCag  | 195 |
| SH3BP5  | NM_001018009 | GCAAAAGGCGAGUACAAGAtt  | UCUUGUACUCGCCUUUUGCca  | 115 |
| SH3BP5  | NM_001018009 | GGAGCGAGCUGGUGCAUAAtt  | UUAUGCACCAGCUCGCUCctg  | 176 |
| SH3BP5  | NM_001018009 | UGACAGCUGUAGCAACUUUt   | AAAGUUGCUACAGCUGUCAtc  | 256 |
| SH3BP5L | NM_030645    | GAGUCGCGAGGAAACUGAtt   | UCAGUUUCCUCGCCGACUCct  | 102 |
| SH3BP5L | NM_030645    | GGUGCUAGUGGGUCCCUAAtt  | UUAGGGACCCACUAGCACctt  | 117 |
| SH3BP5L | NM_030645    | AGAACUGGAUCCUAGAAUAtt  | UAUUCUAGGAUCCAGUUCUtc  | 162 |
| SKAP1   | NM_001075099 | GCAAGGAGUAUAACAUGUAtt  | UACAUGUUUAUCUCCUUGCtc  | 87  |
| SKAP1   | NM_001075099 | GGGUGGAUCAAAUAAGUUUt   | AAACUUUUUGAUCCACCag    | 184 |
| SKAP1   | NM_001075099 | CACCCUUUUUGUCAGAUUAtt  | UAAUCUGACAAAAAGGGUGca  | 296 |
| SKP2    | NM_032637    | GAAUCUUAGCGGCUACAGAtt  | UCUGUAGCCGCUAAGAUUCag  | 145 |
| SKP2    | NM_032637    | GGCCUAAGCUAAAUCGAGAtt  | UCUCGAUUUAGCUUAGGCctg  | 149 |
| SKP2    | NM_032637    | GACCUAUCGAACUCAGUUAtt  | UACUGAGUUCGAUAGGUCca   | 267 |
| SLAMF6  | NM_052931    | GGAAAGCGACUGAACUUCAtt  | UGAAGUUCAGUCGCUUUCct   | 117 |
| SLAMF6  | NM_052931    | GGAACAUACAAGUUACCAAtt  | UUGGUAACUUGUAUGUUCctc  | 94  |
| SLAMF6  | NM_052931    | CCACGUGACUAAUCCGAAAtt  | UUUCGGAUUAGUCACGUGGat  | 159 |
| SLK     | NM_014720    | GGAAAUUGAGAAUCUAGAAtt  | UUCUAGAUUCUCAUUUCctg   | 109 |
| SLK     | NM_014720    | GAUCGAUAUCUUACAAGAtt   | UCUUGUAAAGAUUCGAUCca   | 232 |
| SLK     | NM_014720    | GCAGAAACAGACUAUCGAAAtt | UUCGAUAGUCUGUUUCUGctg  | 569 |
| SMG1    | NM_015092    | GUGGGUACCAUAUCGCUUAtt  | UAAGCGAUUAGGUACCCActa  | 218 |
| SMG1    | NM_015092    | GCAACUGCUUUAAACCCGAtt  | UCGGGUUUAAAGCAGUUGCca  | 290 |
| SMG1    | NM_015092    | CCAUUUCGCUUAGUAGUGAtt  | UCACUACUAAGCGAUUUGGta  | 585 |
| SNF1LK  | NM_173354    | ACACGAUUAGAUUCAAGCAtt  | UGCUIUGAAUCUAAUCGUGUtt | 105 |
| SNF1LK  | NM_173354    | GCUUUACCAGGUUAUGGAAAtt | UUGCAUAACCUGGUAAAGCtt  | 115 |

|         |           |                        |                       |     |
|---------|-----------|------------------------|-----------------------|-----|
| SNF1LK  | NM_173354 | CACUGAAUUUGCUAAAAUtt   | AUUUUUAGCAAUUCAGUGac  | 112 |
| SNF1LK2 | NM_015191 | CCAUAGCCCAAUCAAGGAtt   | UCCUUGAUUUGGGCUAUGGtt | 156 |
| SNF1LK2 | NM_015191 | GGAAGAUUGUGCACCGUGAtt  | UCACGGUGCACAUCUUCGga  | 272 |
| SNF1LK2 | NM_015191 | GAAGGAUGUUGGUCCUAGAtt  | UCUAGGACCAACAUCUUCgg  | 300 |
| SNRK    | NM_017719 | CCCGCAAGCUUAAAACCCAtt  | UGGGUUUUAAGCUUGCGGtg  | 117 |
| SNRK    | NM_017719 | CAAUGAUCAUUGGAUUGCAAtt | UUGCAAUCCAUGAUCAUUGtc | 234 |
| SNRK    | NM_017719 | CACUGACAAUGAUCAUUGGAtt | UCCAUGAUCAUUGUCAGUGtt | 204 |
| SNX16   | NM_022133 | GGGUCCAUUUGAUAGCCUAtt  | UAGGCUAUCAAAUGGACCCgg | 228 |
| SNX16   | NM_022133 | GAUAGACCAUCUACACCUAtt  | UAGGUGUAGAUGGUCUAUCtt | 109 |
| SNX16   | NM_022133 | CACUUGAGGUUGAUCAAGAtt  | UCUUGAUCAACCUCAAGUGca | 233 |
| SPHK1   | NM_182965 | AACUACUUCUGGAUGGUCAtt  | UGACCAUCCAGAAGUAGUUtg | 72  |
| SPHK1   | NM_182965 | GGAAGAGUGGGUUCCAAGAtt  | UCUUGGAACCCACUCUUCct  | 238 |
| SPHK1   | NM_182965 | UCACGCUGAUGCUCACUGAtt  | UCAGUGAGCAUCAGCGUGAg  | 503 |
| SPHK2   | NM_020126 | CCCUCACCCUUACAUCGCAtt  | UGCGAUGUAAGGGUGAGGGca | 133 |
| SPHK2   | NM_020126 | CGGCCUACUUCUGCAUCUAtt  | UAGAUGCAGAAGUAGGCCGct | 100 |
| SPHK2   | NM_020126 | CAAGGCAGCUCUACACUCAtt  | UGAGUGUAGAGCUGCCUUGgg | 116 |
| SRC     | NM_198291 | CCAUUUACAUCGUCACGGAtt  | UCCGUGACGAUGUAAAUGGgc | 267 |
| SRC     | NM_198291 | GCACAGGACAGACAGGCUAtt  | UAGCCUGUCUGUCCUGUGctg | 132 |
| SRC     | NM_198291 | GCCUCUCAGUGUCUGACUUt   | AAGUCAGACACUGAGAGGCag | 201 |
| SRMS    | NM_080823 | GCACGAGGUUUUCACCUAUtt  | AUAGGUGAAAACCUCGUGCag | 112 |
| SRMS    | NM_080823 | GACCAACCCUGGUACUUUAtt  | UAAAGUACCAGGGUUGGUCtg | 128 |
| SRMS    | NM_080823 | AGACCAACCCUGGUACUUUtt  | AAAGUACCAGGGUUGGUCUga | 139 |
| SRPK1   | NM_003137 | GGUUAUCAUGGGAUUUCAtt   | UGAAUAUCCAUGAUAAACcat | 148 |
| SRPK1   | NM_003137 | GAUACCAUGUGAUCCGAAAtt  | UUUCGGAUCACAUGGUUUCtc | 116 |
| SRPK1   | NM_003137 | GGAGAUCUAUUCAAUGGGAtt  | UCCAUAUGAAUAGAUCUCc   | 230 |
| SRPK2   | NM_182691 | GCAUAAACACUUCACGGAAtt  | UUCGUGAAGUGUUUAUGCac  | 130 |
| SRPK2   | NM_182691 | GCAGAUAAAAUUAGAGUAAAtt | UUACUCUAAUUUAUCUGCat  | 88  |
| SRPK2   | NM_182691 | GGGAGAUUAAUUUGUUUGAAtt | UUCAACAAAUAUCUCCgt    | 131 |
| SRPK3   | NM_014370 | GAGAGACCAUUGUCCAGCUtt  | AGCUGGACAAUGGUCUCUCtt | 81  |
| SRPK3   | NM_014370 | GCAGAUAAGAUCAAGAUCAtt  | UGAUCUUGAUCUUAUCUGCat | 117 |
| SRPK3   | NM_014370 | GGCGCAAACGAAACAGCAAtt  | UGCUGUUUCCGUUUGCGCct  | 116 |

|         |              |                        |                       |     |
|---------|--------------|------------------------|-----------------------|-----|
| STAP2   | NM_017720    | CCUUCACACUACUAUGAGAtt  | UCUCAUAGUAGUGUGAAGGca | 158 |
| STAP2   | NM_017720    | AACUAUUUCGUGUCGCAUAtt  | UAUGCGACACGAAAUAGUUga | 114 |
| STAP2   | NM_017720    | GGAGAUCAAGUUCAAGGUAtt  | UACCUUGAACUUGAUCUCctg | 79  |
| STK10   | NM_005990    | AGAUAGCCCUGGAUAAGAAtt  | UUCUUAUCCAGGGCUAUCUtc | 160 |
| STK10   | NM_005990    | GAAGAGCAUCGGAACCAGAtt  | UCUGGUUCCGAUGCUCUUCtt | 86  |
| STK10   | NM_005990    | GGACUACACCAGGUUCCAAtt  | UUGGAACCUGGUGUAGUCcgg | 386 |
| STK11   | NM_000455    | GGCUCUUACGGCAAGGUGAtt  | UCACCUUGCCGUAAGAGCCtt | 134 |
| STK11   | NM_000455    | ACAUCACCACGGGUCUGUAtt  | UACAGACCCGUGGUGAUGUtg | 103 |
| STK11   | NM_000455    | AGGAGGUUACGGCACAAAAtt  | UUUUGUGCCGUAACCUCCuca | 173 |
| STK11IP | NM_052902    | CUGCGUUUCUUGAACCUAAtt  | UUAGGUUCAAGAAACGCAGag | 131 |
| STK11IP | NM_052902    | GGCAAGGUCUUGUCACUGAtt  | UCAGUGACAAGACCUUGCCat | 103 |
| STK11IP | NM_052902    | CCCUGUUCUGUUAGAUGAtt   | UCAUCUAACAGGAACAGGGtg | 150 |
| STK16   | NM_001008910 | AUAUAUUGCUUGGAGAUGAtt  | UCAUCUCCAAGCAAUAUAtg  | 121 |
| STK16   | NM_001008910 | CCAACUCAGCAUCCCACAAtt  | UUGUGGGAUGCUGAGUUGGtt | 206 |
| STK16   | NM_001008910 | GGUACGCUGUGGAUUGAGAtt  | UCUCAUUCCACAGCGUACctc | 356 |
| STK17A  | NM_004760    | GGUCAUUAAUUUACAUGAAtt  | UUCAUGUAAAUAUUGACCca  | 93  |
| STK17A  | NM_004760    | GGAUACCGACAAAUCAGAAAtt | UUCUGAUUUGUCGGUAUCCga | 160 |
| STK17A  | NM_004760    | GGACACUUUUAGUUAAAGAAtt | UUCUUAACUAAAAGUGUCctg | 597 |
| STK17B  | NM_004226    | CAGAAAUCCUGAACUAUGAtt  | UCAUAGUUCAGGAUUUCUGga | 60  |
| STK17B  | NM_004226    | CGAUGACUCAUUACCCAAUtt  | AUUGGGUAAUGAGUCAUCGaa | 198 |
| STK17B  | NM_004226    | CAUUUGUGGGGAGAAGAUAAtt | UUAUCUUCUCCCACAAAUGgt | 250 |
| STK19   | NM_032454    | GCAUGGUCCGGAAGGCAAAtt  | UUUGCCUUCGGACCAUGCta  | 104 |
| STK19   | NM_032454    | UCCUUAGCAUGGUCCGGAAtt  | UUCGGACCAUGCUAAGGAca  | 235 |
| STK19   | NM_032454    | CCUGAUCCCGGAGACCUUUtt  | AAAGGUCUCCGGGAUCAGGtg | 227 |
| STK24   | NM_001032296 | CCAGAUCGCUACUAUAUUAtt  | UAAUAUAGUAGCGAUCUGGgt | 196 |
| STK24   | NM_003576    | GCUUUAGACCCACUGCUAAtt  | UUAGCAGUGGGUCUAAAGCtc | 168 |
| STK24   | NM_001032296 | GCUCCGCACUAGAUCUAUUtt  | AAUAGAUCUAGUGCGGAGCct | 161 |
| STK25   | NM_006374    | UCCUGUUCUGAUUCCCAAtt   | UUGGGAAUCAGGAACAGGAcg | 148 |
| STK25   | NM_006374    | ACAAGUUCAUCACACGCUAtt  | UAGCGUGUGAUGAACUUGUgc | 195 |
| STK25   | NM_006374    | GGAUUAUCUGCACUCCGAAtt  | UUCGGAGUGCAGAUAAUCCag | 272 |
| STK3    | NM_006281    | GAGAUACACUGCGAAAAGAtt  | UCUUUUCGCAGUGUAUCUctg | 137 |

|        |           |                        |                        |     |
|--------|-----------|------------------------|------------------------|-----|
| STK3   | NM_006281 | GACAUAAUUAGAUUACGAAtt  | UUCGUAAUCUAAUUUGUCtg   | 107 |
| STK3   | NM_006281 | GCCCAUAUGUUGUAAAGUAtt  | UACUUUACAACAUUUGGGCtg  | 185 |
| STK32A | NM_145001 | CGUUAUCACCUGCAACAGAtt  | UCUGUUGCAGGUGAUAAACGca | 152 |
| STK32A | NM_145001 | UGAAGUACAUGAAUAAACAAtt | UGUUUAUUCAUGUACUUCAtt  | 127 |
| STK32A | NM_145001 | AGGUCUGCAUUGUACAGAAtt  | UUCUGUACAAUGCAGACCUtc  | 136 |
| STK32B | NM_018401 | AGAUGAUUCUAGAAUCCAAtt  | UUGGAUUCUAGAAUCAUCUct  | 97  |
| STK32B | NM_018401 | ACAUAGCGACGGUAGUGAAtt  | UUCACUACCGUCGCUAUGUtg  | 182 |
| STK32B | NM_018401 | CAUUACAGACUUCAACAAtt   | UAUGUUGAAGUCUGUAAUGtg  | 99  |
| STK32C | NM_173575 | GGAUGAGAGAGGACAUGCAtt  | UGCAUGUCCUCUCUCAUCCag  | 170 |
| STK32C | NM_173575 | CGAGAAUGACUAUCUUCAAtt  | UUGAAGAUAGUCAUUCUCGga  | 120 |
| STK32C | NM_173575 | GGCCGGUGUUUGACGACAAtt  | UUGUCGUCAAACACCGGCtc   | 144 |
| STK33  | NM_030906 | GCUUAGCGGUGAAGAAGCAtt  | UGCUUCUUCACCGCUAAGCca  | 160 |
| STK33  | NM_030906 | GCUAAGGAACUACUAGAUAtt  | UAUCUAGUAGUUCUUCAGtg   | 169 |
| STK33  | NM_030906 | GCAAUUUCUGCAACCAGUtt   | ACUGGUUGCAGGAAAUUGCtt  | 136 |
| STK35  | NM_080836 | AGAUCGUCCCUGUUGGUGAtt  | UCACCAACAGGGACGAUCUca  | 147 |
| STK35  | NM_080836 | CAACAAAAGUUUCAUGCAtt   | UAGCAUGAAACUUUUGUUGgt  | 283 |
| STK35  | NM_080836 | GGGCAAUGAUAGAAAGAAUtt  | AUUCUUUCUAUCAUUGCCag   | 131 |
| STK36  | NM_015690 | GGAUCUUAGCCUCAGAAUtt   | AAUUCUGAGGCUAAGAUCcag  | 257 |
| STK36  | NM_015690 | CUACUGAAGUGACACUCUAtt  | UAGAGUGUCACUUCAGUAGac  | 175 |
| STK36  | NM_015690 | GCAUAUGCUUGACAGCUUtt   | AAAGCUGUCAAGCAUAUGCac  | 387 |
| STK38  | NM_007271 | CCUUAUCGCUCAACAUGAAtt  | UUCAUGUUGAGCGAUAAAGGtt | 66  |
| STK38  | NM_007271 | GAGACUGACUACAAGAACAAtt | UGUUCUUGUAGUCAGUCUCag  | 128 |
| STK38  | NM_007271 | GCAAUGAAAAUACUCCGUAtt  | UACGGAGUAUUUCAUUGCat   | 97  |
| STK38L | NM_015000 | GGUUUGAAGGGUUGACUCAtt  | UGAGUCAACCCUUCAAACtt   | 30  |
| STK38L | NM_015000 | GGAGUGAUUAUGUAUGAAAtt  | UUUCAUACAUAUACACUCcga  | 144 |
| STK38L | NM_015000 | GGACUUAUUUCUCAGAUUtt   | AAAUCUGAGAAUUAAGUCtt   | 258 |
| STK39  | NM_013233 | GUGUAGCAAUAAAACGGAUtt  | AUCCGUUUUAUUGCUACACgt  | 168 |
| STK39  | NM_013233 | GGUUCAAUGUUGGAUAUCAAtt | UGAUAUCCAACAUUGAACctc  | 164 |
| STK39  | NM_013233 | CCAACGUAGUGACCUAUUAtt  | UAAUAGGUCACUACGUUGGga  | 114 |
| STK4   | NM_006282 | GGAUGGAGACUACGAGUUtt   | AAACUCGUAGUCUCCAUCctg  | 173 |
| STK4   | NM_006282 | CAGUGAUAGGAACCAAUtt    | AAUGGUGUCCUAUCACUGta   | 140 |

|           |           |                        |                        |     |
|-----------|-----------|------------------------|------------------------|-----|
| STK4      | NM_006282 | GGAAAUUGGAUACAACUGUtt  | ACAGUUGUAUCCA AUUUCctg | 223 |
| STK40     | NM_032017 | GCCGGAUGGUUAAGAAGAUtt  | AUCUUCUUAACCAUCCGGCtg  | 101 |
| STK40     | NM_032017 | GGCUGCCGAGUAUACCAUtt   | AAUGGUUAUCUCGGCAGCCtt  | 301 |
| STK40     | NM_032017 | GAAUCCAGCCGGAUGGUUAtt  | UAACCAUCCGGCUGGAUUCtg  | 153 |
| STYK1     | NM_018423 | GGCGGAUGUGAUGACUAtt    | AUAGUCAUCACAUCCCGCCga  | 148 |
| STYK1     | NM_018423 | CAAGAUUUCUUAAGGGCGAAtt | UUCGCCCUAAGAAAUCUUGta  | 242 |
| STYK1     | NM_018423 | CCAACUUUGUUGGUUACUAtt  | UAGUAACCAACAAAGUUGGga  | 129 |
| TAF1      | NM_138923 | GGAACUACAGCGAAUGCUAtt  | UAGCAUUCGCGUGUAGUUCctt | 217 |
| TAF1      | NM_138923 | GGACCAGGAUUCU AUUACUtt | AGUAAUAGAAUCCUGGUCctt  | 260 |
| TAF1      | NM_138923 | CACUGUUCACUGUGACUAtt   | AUAGUCACAGUGAACAGUGgt  | 306 |
| TAF1L     | NM_153809 | CACUGUUC AUUUGUGACUAtt | AUAGUCACAAUGAACAGUGgt  | 162 |
| TAF1L     | NM_153809 | CCGUGAAAAUGUGCGUAAAtt  | UUUACGCACAUUUUCACGGag  | 89  |
| TAF1L     | NM_153809 | CAGUGUAUCUUCAUAAGAUtt  | AUCUUAUGAAGAUACACUGga  | 143 |
| TAOK1     | NM_020791 | GGAAUUAUAUAAGCGAAGAtt  | UCUUCGCUUAUUUAUUCcag   | 109 |
| TAOK1     | NM_020791 | GAACGAGAACUAAGACGAAtt  | UUCGUCUUAAGUUCUGUUCtc  | 89  |
| TAOK1     | NM_020791 | CAGUGUAUUUUGCACGAGAtt  | UCUCGUGCAAAAUACACUGct  | 164 |
| TAOK2     | NM_016151 | CCACCGCUCUUUAACAUGAtt  | UCAUGUUAAGAGCGGUGGtt   | 89  |
| TAOK2     | NM_016151 | GGGAGGACCUGAACAAGAAtt  | UUCUUGUUCAGGUCCUCCgc   | 209 |
| TAOK2     | NM_016151 | CGGAAACCACCGCUCUUUAtt  | UAAAGAGCGGUGGUUUCGtt   | 206 |
| TAOK3     | NM_016281 | GGAGUACAAUAAGAGGCGAtt  | UCGCCUCUUAUUGUACUCcag  | 161 |
| TAOK3     | NM_016281 | GCAUGGAUCUGAUCCGUUtt   | AAACGGAUCAGAUCCAUGCgt  | 306 |
| TAOK3     | NM_016281 | GCAUGACUUUGUUCGACGAtt  | UCGUCGAACAAAGUCAUGCct  | 144 |
| TBK1      | NM_013254 | GAACGUAGAUUAGCUUAUAtt  | UAUAAGCUAAUCUACGUUCtg  | 154 |
| TBK1      | NM_013254 | GGAACCUCUGAAUACCAUAtt  | UAUGGUAUUCAGAGGUUCcg   | 237 |
| TBK1      | NM_013254 | GGCACAACAUUCCCUAAAtt   | UUUAGGGAAAUUGUUGCCag   | 127 |
| tcag7.875 | XM_372002 | GAACU AUCUCUACCAAUAtt  | AUAUUGGUAGAGAUAGUUCaa  | 114 |
| tcag7.875 | XM_372002 | CUCAGAUGCUGUUAACAGAtt  | UCUGUUAACAGCAUCUGAGtt  | 303 |
| tcag7.875 | XM_372002 | GGAUUACAACAUGUGAAUtt   | AAUUCACAUGUUGUAAUCCca  | 202 |
| TEC       | NM_003215 | CUGAGAUUAUUGAAUAUCAtt  | UGAUUAUCAAUAAUCUCAGga  | 108 |
| TEC       | NM_003215 | CAUAUGAAUGGU AUUUGCAtt | UGCAAUACCAUUCAU AUUGat | 74  |
| TEC       | NM_003215 | CAGUCUCCCUUUAUACCAAtt  | UUGGUUAUAAGGGAGACUGtg  | 48  |

|        |           |                        |                       |     |
|--------|-----------|------------------------|-----------------------|-----|
| TEK    | NM_000459 | CAAACCCGUUAAUCACUAUtt  | AUAGUGAUUACGGGUUUGta  | 116 |
| TEK    | NM_000459 | CUUCUAUACAAACCCGUUAtt  | UAACGGGUUUGUAUAGAAGct | 107 |
| TEK    | NM_000459 | GCUUCUAUACAAACCCGUUtt  | AACGGGUUUGUAUAGAAGCtt | 141 |
| TESK1  | NM_006285 | GGCAAGUCAUGGUGCUGAAtt  | UUCAGCACCAUGACUUGCCct | 133 |
| TESK1  | NM_006285 | CGACAGUCAGGGCAAGUCAtt  | UGACUUGCCCUGACUGUCGgt | 104 |
| TESK1  | NM_006285 | GGACAGCUGCACGCUCUAtt   | UAAGAGCGUGCAGCUGUCCct | 113 |
| TESK2  | NM_007170 | GAAGUACAGCUCUAUGAAUAtt | UAUUCAUGAGCUGUACUUCtt | 97  |
| TESK2  | NM_007170 | GAACAGUUGCUGACAGUAtt   | UACUGUCUAGCAACUGUUCca | 163 |
| TESK2  | NM_007170 | GCACUUACAGAGUAUAUAtt   | UGAUUAUCUCUGUAAGUGCat | 341 |
| TEX14  | NM_031272 | GACCUAACCCAGGUAGAUGAtt | UCAUCUACCUGGUUAGGUCcg | 104 |
| TEX14  | NM_031272 | CGAGUUUUUGAGUAUCAUAtt  | UAUGAUACUCAAAACUCGct  | 207 |
| TEX14  | NM_031272 | GCAGUUUCGAAAUCAACGAtt  | UCGUUGAUUUCGAAACUGCag | 110 |
| TGFBR1 | NM_004612 | GCAAUGGGCUUAGUAUUCUtt  | AGAAUACUAAGCCCAUUGCat | 150 |
| TGFBR1 | NM_004612 | GCCUUUUUAUGAUCUUGUAtt  | UACAAGAUCAAUAAGGCag   | 90  |
| TGFBR1 | NM_004612 | GGUACUACGUUGAAAGACUtt  | AGUCUUUCAACGUAGUACCct | 67  |
| TGFBR2 | NM_003242 | CCAGCAAUCCUGACUUGUAtt  | AACAAGUCAGGAUUGCUGGtg | 149 |
| TGFBR2 | NM_003242 | GGAGAAAGAAUGACGAGAAtt  | UUCUCGUCAUUCUUUCUCCat | 115 |
| TGFBR2 | NM_003242 | GCUUUGCUGAGGUCUAUAAtt  | UUAUAGACCUCAGCAAAGCga | 242 |
| TIE1   | NM_005424 | GAGUUCAACUAGAGACGAtt   | UCGUCUCUAAGUUGAACUCca | 147 |
| TIE1   | NM_005424 | GAACCGAGGUUACUUGUAUtt  | AUACAAGUAACCUCGGUUCtt | 77  |
| TIE1   | NM_005424 | GGUUACUUGUAUAUCGCUAtt  | UAGCGAUUAACAAGUAACCtc | 115 |
| TK1    | NM_003258 | GGGAAGCCGCCUAUACCAAtt  | UUGGUUAGGCGGCUUCCCgg  | 121 |
| TK1    | NM_003258 | GGGCCGAUGUUCUCAGGAAtt  | UUCCUGAGAACAUCGGCCCga | 145 |
| TK1    | NM_003258 | GUCGCUUCCAGAUUGCUCAtt  | UGAGCAAUCUGGAAGCGACgg | 170 |
| TK2    | NM_004614 | CUGUUGAUUUUGAUAGUUUAtt | UAAACUAUCAAAUCAACAGac | 260 |
| TK2    | NM_004614 | GAACAAAUCGGGAUCGAAtt   | UUCGAUCCCGAUUUUGUUCaa | 444 |
| TK2    | NM_004614 | GCUCUGUGAUACCCAAUAAtt  | UUAUUGGGUAUCACAGAGCaa | 179 |
| TLK1   | NM_012290 | CCUCAUCUGUUCGACCGAAtt  | UUCGGUCGAACAGAUGAGGaa | 112 |
| TLK1   | NM_012290 | CUUGGAUACAGAUACGUUtt   | AAACGUUUCUGUAUCCAAGga | 219 |
| TLK1   | NM_012290 | GCGACUAUUUUGAAUACCAtt  | UGGUUUUCAAAAUAGUCGCta | 408 |
| TLK2   | NM_006852 | GACUCGUUUUGUACAGUAUtt  | AUACUGUACAAAACGAGUCag | 88  |

|          |              |                        |                        |     |
|----------|--------------|------------------------|------------------------|-----|
| TLK2     | NM_006852    | GCAUGUAGGGAAUACCGGAtt  | UCCGGUAUUCCCUACAUGCAt  | 284 |
| TLK2     | NM_006852    | CAAGCAUGCAUGUAGGGAAtt  | UUCCCUACAUGCAUGCUUGtg  | 326 |
| TNIK     | NM_015028    | CGACAUACCCAGACUGAUAtt  | UAUCAGUCUGGGUAUGUCGct  | 134 |
| TNIK     | NM_015028    | GCUACGAGUUUACUAUCUUt   | AAGAUAGUAAACUCGUAGCtt  | 256 |
| TNIK     | NM_015028    | GCUAGUUGAUCUCACGGUAtt  | UACCGUGAGAUCAACUAGCag  | 184 |
| TNK1     | NM_003985    | UCAACACCCAGGAAGCAUAtt  | UAUGCUCUCCUGGGUGUUGAtc | 119 |
| TNK1     | NM_003985    | CGCCCACCUUUUACCUCUAtt  | UAGAGGAUAAAGGUGGGCGtg  | 172 |
| TNK1     | NM_003985    | AGGUAUCGGUCAUGAUGAAtt  | UUCAUCAUGACCGAUACCUct  | 97  |
| TNK2     | NM_001010938 | GGUGUUCAGUGGAAAGCGAtt  | UCGCUUCCACUGAACACctt   | 94  |
| TNK2     | NM_001010938 | AGGACUUUGAGGAACCGGAtt  | UCCGGUCCUCAAGUCCUga    | 192 |
| TNK2     | NM_001010938 | CGCAAGUCGUGGAUGAGUAtt  | UACUCAUCCACGACUUGCGtt  | 150 |
| TNNI3K   | NM_015978    | CCAUCUCGACUGACAAGAAtt  | UUCUUGUCAGUCGAGAUGGgc  | 105 |
| TNNI3K   | NM_015978    | GCAUUGACCUAGUCAAAUUt   | AAUUUGACUAGGUCAAUGCtc  | 222 |
| TNNI3K   | NM_015978    | CAUUGCAUAUUGCAGCGUAtt  | UACGCUGCAAUAUGCAAUGga  | 325 |
| TPD52L3  | NM_001001875 | GGCUGAAAUUGUAACCCUAtt  | UAGGGUUACAAUUUCAGCctc  | 81  |
| TPD52L3  | NM_001001874 | UCAGGUCUCCAACACCUAUtt  | AUAGGUGUUGGAGACCUGAac  | 80  |
| TPD52L3  | NM_001001874 | ACUCGACUUCUGAACUGGAtt  | UCCAGUUCAGAAGUCGAGUgg  | 31  |
| TPK1     | NM_001042482 | GCCUUUGGACAACUAUUUUt   | AAAAUAGUUGUCCAAAGGctg  | 85  |
| TPK1     | NM_001042482 | GGAGACUUUGAUUCUAUUAtt  | UAAUAGAAUCAAGUCUCcat   | 183 |
| TPK1     | NM_001042482 | GCUUAUAUGAUUAUCACCGAtt | UCGGUGAUUAUCAUAUAAGCgg | 316 |
| TPR      | NM_003292    | GAGUCUGCGUUAUCGACAAtt  | UUGUCGAUAACGCAGACUCtc  | 114 |
| TPR      | NM_003292    | GAAGUUCAUACUAAGCGUAtt  | UACGCUUAGUAUGAACUUCct  | 103 |
| TPR      | NM_003292    | CAUAUGAAGGUCGAAUUAtt   | UAAUUCGACCUUCAUAUUGgg  | 137 |
| TRAF3IP3 | NM_025228    | GACCAACAAUUAAGAACGAtt  | UCGUUCUAAUUGUUGGUCct   | 126 |
| TRAF3IP3 | NM_025228    | GAACAGGAGAAACUCUUAAtt  | UUAAGAGUUUCUCCUGUUCtt  | 93  |
| TRAF3IP3 | NM_025228    | GGACCUACAAGAUCAACUAtt  | UAGUUGAUCUUGUAGGUCCtg  | 90  |
| TRIB1    | NM_025195    | CCCUUCUGGUUGGACGAUAtt  | UAUCGUCCAACCAGAAGGGtg  | 116 |
| TRIB1    | NM_025195    | GAUGAUGCUUUGUCAGACAtt  | UGUCUGACAAAGCAUCAUctt  | 140 |
| TRIB1    | NM_025195    | GCAAGGUGUUUCCCAUUAAtt  | UUA AUGGGAAACACCUUGCag | 218 |
| TRIB2    | NM_021643    | CCAGAGAUCUUGAACACCAtt  | UGGUGUUCAAGAUCUCUGGgc  | 147 |
| TRIB2    | NM_021643    | GAACUUGUCGCAUUGCGUUt   | AACGCAAUGCGACAAGUUCgg  | 202 |



|        |           |                        |                        |     |
|--------|-----------|------------------------|------------------------|-----|
| TRIB2  | NM_021643 | GAAGAGUUGUCGUCUAUAAtt  | UUAUAGACGACAACUCUUCga  | 473 |
| TRIB3  | NM_021158 | CCAGCUCUCUACGCCUUUtt   | AAAGGCGUAGAGGAGCUGGgt  | 139 |
| TRIB3  | NM_021158 | CGGUUGGAGUUGGAUGACAtt  | UGUCAUCCAACUCCAACCGct  | 46  |
| TRIB3  | NM_021158 | GGAAGAAGCGGUUGGAGUUtt  | AACUCCAACCGCUUCUUCctg  | 331 |
| TRRAP  | NM_003496 | CUACGAUUCUGGUGGAAUAtt  | UAUUCCACCAGAAUCGUAGca  | 212 |
| TRRAP  | NM_003496 | GGAAUUACGGAGAUUAUAGAtt | UCUAUAUCUCCGUAAUUCctt  | 570 |
| TRRAP  | NM_003496 | GAAUUACGGAGAUUAUAGAAtt | UUCUAUAUCUCCGUAAUUCct  | 603 |
| TSKS   | NM_021733 | GGAAGAUGCUGAAAUCAAAAtt | UUUGAUUUCAGCAUCUUCc    | 118 |
| TSKS   | NM_021733 | GCACCAACGUGUCACUGCUtt  | AGCAGUGACACGUUGGUGCag  | 361 |
| TSKS   | NM_021733 | GCUGUUCACCGGCAUCGAAtt  | UUCGAUGCCGGUGAACAGCtt  | 291 |
| TSSK1B | NM_032028 | CGUCGACUAUGGAGACAGAtt  | UCUGUCUCCAUAUGUCGACGgc | 246 |
| TSSK1B | NM_032028 | CUCCUCGAGUUAUCAAAtt    | UUUUGAUUAACUCGAGGAGgt  | 109 |
| TSSK1B | NM_032028 | CAAGAUCCAUAAACUUUUAtt  | UAAAAGUUUAUGGAUCUUGcc  | 152 |
| TSSK2  | NM_053006 | GCUCCAUCAUCAAGACUUAtt  | UAAGUCUUGAUGAUGGAGCcg  | 232 |
| TSSK2  | NM_053006 | GGUUCCUACGCAAAGUCAtt   | UGACUUUUGCGUAGGAACCct  | 197 |
| TSSK2  | NM_053006 | GGACGGAUCUCAUCAUCAAtt  | UGAUGAUGUAGAUCGUCctg   | 186 |
| TSSK3  | NM_052841 | GGCCUUCAAUUGAAGAAGUtt  | ACUUCUUCAAUUGAAGGCCgg  | 143 |
| TSSK3  | NM_052841 | GGUGUGGUCCUGUAUGUCAAtt | UGACAUACAGGACCACACCca  | 295 |
| TSSK3  | NM_052841 | GGGACCUACUCAAAAGUCAtt  | UGACUUUUGAGUAGGUCCctt  | 87  |
| TSSK4  | NM_174944 | GCUCCACAACACCACUAAAtt  | UUUAGUGGUGUUGUGGAGCtg  | 147 |
| TSSK4  | NM_174944 | UGAUGACACCAAUCUCAAAAtt | UUUGAGAUUGGUGUCAUCAaa  | 124 |
| TSSK4  | NM_174944 | GAAGGCCUCUGAUGACUAUtt  | AUAGUCAUCAGAGGCCUUCtt  | 152 |
| TSSK6  | NM_032037 | CGGACUUCGUAACAAGUUtt   | AACUUGUUGACGAAGUCCGgg  | 123 |
| TSSK6  | NM_032037 | GGGAAACUGUACAUCGUGAtt  | UCACGAUGUACAGUUUCCctg  | 206 |
| TSSK6  | NM_032037 | CAGUUGCCCUUGUUCGGAAtt  | UUCGGAACAAGGCAACUGcg   | 199 |
| TTBK1  | NM_032538 | GAACGAGAAGUUUAACUAUtt  | AUAGUUAAACUUCUCGUUCct  | 143 |
| TTBK1  | NM_032538 | CAAAGUUGAGAGGACCUUtt   | AAAGGUCCUCUCAACUUUGgt  | 127 |
| TTBK1  | NM_032538 | GACUACCAGUUGAUGAUGUtt  | ACAUGAUCAACUGGUAGUCgg  | 153 |
| TTBK2  | NM_173500 | GCAUCUUUCUAGACCAUAUtt  | AUAUGGUCUAGAAAGAUGCtg  | 93  |
| TTBK2  | NM_173500 | GUCAUGACAUGUUACCCAAtt  | UUGGGUAACAUGUCAUGACca  | 124 |
| TTBK2  | NM_173500 | GAAUGAUCGAUUAACUAUtt   | AUAGUUGAAUCGAUCAUUCct  | 209 |

|        |           |                        |                        |     |
|--------|-----------|------------------------|------------------------|-----|
| TTC33  | NM_012382 | CACUUUUCACCAAAGUCAAtt  | UUGACUUUGGUGAAAAGUGtg  | 178 |
| TTC33  | NM_012382 | GUAGCACAGAGGAUUAAAAtt  | UUUUAAUCCUCUGUGCUACct  | 138 |
| TTC33  | NM_012382 | GAUGCUACCCUAUACGAGAtt  | UCUCGUAUAGGGUAGCAUCat  | 378 |
| TTK    | NM_003318 | GGUUGUGCCUGGAUCUAAAtt  | UUUAGAUC CAGGCACAACCaa | 93  |
| TTK    | NM_003318 | GAUAGUUACCGGAACGAAAtt  | UUUCGUUCCGGUAACUAUCaa  | 187 |
| TTK    | NM_003318 | CUCUUGAUAGUUACCGGAAtt  | UUCCGGUAACUAUCAAGAGtt  | 127 |
| TWF1   | NM_002822 | GGAAUUCGAAGACUAAUUAtt  | UAAUUAGUCUUCGAAUUCct   | 117 |
| TWF1   | NM_002822 | GAAAGAUCGAGAUAGACAAtt  | UUGUCUAUCUCGaucUUUCta  | 67  |
| TWF1   | NM_002822 | GGAUUCAGCUCGUUACCAUtt  | AUGGUAACGAGCUGAAUCct   | 34  |
| TWF2   | NM_007284 | AGUCUGUAGUGUUCAUCUAtt  | UAGAUGAACACUACAGACUca  | 106 |
| TWF2   | NM_007284 | AGAUGAAGCUGGACCUAGAtt  | UCUAGGUCCAGCUUCAUCUgg  | 200 |
| TWF2   | NM_007284 | AGCAGAAAAUGGUCAACUAtt  | UAGUUGACCAUUUUCUGCUtg  | 219 |
| TXK    | NM_003328 | GGAAUGACAAGGUACGUUUtt  | AAACGUACCUUGUCAUUCca   | 127 |
| TXK    | NM_003328 | CCCUGUAAUUUAGCCUUAAtt  | UUAAGGCUAAAUAACAGGGtt  | 93  |
| TXK    | NM_003328 | GUGCAGAAGCGACAAAUGAtt  | UCAUUUGUCGCUUCUGCActg  | 181 |
| TXNDC3 | NM_016616 | GACAAGUAGUAUUUACGGAtt  | UCCGAUAAUACUACUUGUCtt  | 193 |
| TXNDC3 | NM_016616 | CGAACGAUCUGAGGAUCAAtt  | UUGAUCCUCAGAU CGUUCGtt | 150 |
| TXNDC3 | NM_016616 | CAACUUCUAUAGUCGAAUAtt  | UAUUCGACUAUAGAAGUUGac  | 165 |
| TXNDC6 | NM_178130 | GAAAGACUGAUGAGAUUAUtt  | AUAAUCUCAUCAGUCUUUCca  | 65  |
| TXNDC6 | NM_178130 | GGUUUGAAAUUCUAACAAAtt  | UUUGUUAGAAUUUCAACCCca  | 95  |
| TXNDC6 | NM_178130 | AGAUGAGGCUCUUUCUGAUtt  | AUCAGAAAGAGCCUCAUCUtt  | 40  |
| TYK2   | NM_003331 | GAUGCUAUUUUCCGCAUAtt   | UAUGCGGAAAUUAGCAUCag   | 178 |
| TYK2   | NM_003331 | CAUCCACAUUGCACAUAAAAtt | UUUAUGUGCAAUGUGGAUGca  | 120 |
| TYK2   | NM_003331 | GGAGUAUAAGUUCUACUAtt   | AUAGUAGAACUUAUACUCctt  | 238 |
| TYRO3  | NM_006293 | GAGCUUUACUUGUCUGCGAtt  | UCGCAGACAAGUAAAGCUCgg  | 140 |
| TYRO3  | NM_006293 | CAGUGACUGUCGGUACAUAtt  | UAUGUACCGACAGUCACUGgg  | 91  |
| TYRO3  | NM_006293 | CAAGCGACAUUGAAGAGUtt   | AACUCUCAAUGUCGCUUGag   | 36  |
| UCK1   | NM_031432 | CACGAGGAGUGGACAAUAtt   | AUAUUGUCCACUCCUCGUGgg  | 121 |
| UCK1   | NM_031432 | AGCAGAUUCUGACGCAGUAtt  | UACUGCGUCAGAAUCUGCUcc  | 244 |
| UCK1   | NM_031432 | CUGCGGACGUGGUUCUGUtt   | AACAGAACCACGUCCGCGagg  | 133 |
| UCK2   | NM_012474 | AGCUUCUACCGUGUCCUAtt   | UAAGGACACGGUAGAAGCUat  | 65  |

|       |              |                         |                        |     |
|-------|--------------|-------------------------|------------------------|-----|
| UCK2  | NM_012474    | GAUUUUAUCUCAGUACAUUt    | AAUGUACUGAGAUAAAAUCtg  | 151 |
| UCK2  | NM_012474    | GUACGAGACCUGUUCAGAtt    | UCUGGAACAGGUCUCGUACct  | 362 |
| UCKL1 | NM_017859    | GCAUUUCCGCGAGUGAGAAtt   | UUCUCACUCGCGGAAAUGCat  | 174 |
| UCKL1 | NM_017859    | CAAGCAGUACAACAAGUUUt    | AAACUUGUUGUACUGCUUGat  | 241 |
| UCKL1 | NM_017859    | CAAUGAACACGGCACGCAAtt   | UUGCGUGCCGUGUUCAUUGta  | 308 |
| UHMK1 | NM_175866    | GGAUGUCAGUGUUUCGGAAtt   | UUCCGAAACACUGACAUCcag  | 171 |
| UHMK1 | NM_175866    | CCACGUAACAUAUUGUGGAtt   | UCCACAUAUGUUACGUGGtt   | 111 |
| UHMK1 | NM_175866    | CGAGUAUGGUUUCGCAAAtt    | UUUGCGGAAACCAUACUCGgc  | 123 |
| ULK1  | XM_001133335 | GCAUCGGCACCAUCGUCUAtt   | UAGACGAUGGUGCCGAUGCtc  | 222 |
| ULK1  | XM_001133335 | GCAUGGACUUCGAUGAGUUt    | AACUCAUCGAAGUCCAUGCgg  | 90  |
| ULK1  | XM_001133335 | CGCCUGUUCUACGAGAAGAtt   | UCUUCUCGUAGAACAGGCgca  | 137 |
| ULK2  | NM_014683    | GCAGAUUAUUUGCAAGCGAtt   | UCGCUUGCAAUAUUCUGCga   | 93  |
| ULK2  | NM_014683    | GCUCGUUACCUACAUAUAGUAtt | UACUAUGUAGGUAACGAGCaa  | 159 |
| ULK2  | NM_014683    | GAAUCUGAACGAACGAUUAUt   | AUAUCGUUCGUUCAGAUUCtt  | 228 |
| ULK3  | XM_001134013 | CUGUCUCGCUUCAUCCAAtt    | UAUGGAUGAAGCGAGACAggt  | 161 |
| ULK3  | XM_001134013 | GCAUGAACGGAAUAUCUCUtt   | AGAGAUAUUCCGUUCAUGCag  | 358 |
| ULK3  | XM_001134013 | CAGCGGAAGGAGGCAAUUAtt   | UAAUUGCCUCCUCCGCUGgg   | 259 |
| ULK4  | XM_929989    | CCACAUCUCUACUCGUGAAAtt  | UUCACGAGUAGAGAUGUGGtt  | 133 |
| ULK4  | XM_929989    | CCUCGUAACUUCACAGGUAtt   | UACCUGUGAAGUUACGAGGtg  | 99  |
| ULK4  | XM_929989    | GCUCCACGGUUGUUGACUAtt   | UAGUCAACAACCGUGGAGCga  | 219 |
| VRK1  | NM_003384    | GCAGUUGGAGAGAUAAUAAtt   | UUAUUUAUCUCUCCAACUGCaa | 76  |
| VRK1  | NM_003384    | GAGAUUCCAAAAUJAGAUAtt   | UAUCUAAUUUUGGAAUCUCta  | 172 |
| VRK1  | NM_003384    | GAUACGGAAUGGUCAAACAtt   | UGUUUGACCAUUCCGUAUCtt  | 169 |
| VRK2  | NM_006296    | GGAUUUGGAUUGAUUAUUUt    | AAUAUAUCAAUCCAAAUCctc  | 74  |
| VRK2  | NM_006296    | GGAGGAUUUGGAUUGAUUAUt   | AUAUCAAUCCAAAUCUCcag   | 148 |
| VRK2  | NM_006296    | GACUAGGAAUAGAUUUACAtt   | UGUAAAUCUAUUCCUAGUCtt  | 419 |
| VRK3  | NM_001025778 | GGAACAACCUAGAAGCUUUt    | AAAGCUUCUAGGUUGUUCctc  | 96  |
| VRK3  | NM_001025778 | GAAUGAGUAUGUUCAUGGAtt   | UCCAUGAACAUACUCAUUCtc  | 203 |
| VRK3  | NM_001025778 | CCACCUCACUUGAAGCUUUt    | AAAGCUUCAAGUGAGGUGGtc  | 82  |
| WEE1  | NM_003390    | CAUCUCGACUUAUUGGAAAtt   | UUUCCAUAAGUCGAGAUGtt   | 87  |
| WEE1  | NM_003390    | CAUUUACGAAUAGAAUUGAtt   | UCAAUUCUAUUCGUAAUUGtt  | 216 |

|        |              |                        |                       |     |
|--------|--------------|------------------------|-----------------------|-----|
| WEE1   | NM_003390    | GUGUCGUCGUAGAAAGAGAtt  | UCUCUUUCUACGACGACActg | 107 |
| WNK1   | NM_018979    | CAUCAUCCCUUAGUCUACAtt  | UGUAGACUAAGGGAUGAUgca | 107 |
| WNK1   | NM_018979    | CCAGCGUAGUUUCAAGUAUtt  | AUACUUGAAACUACGCUGGaa | 161 |
| WNK1   | NM_018979    | CAAUGAGUCAGAUAUcGAAtt  | UUCGAUAUCUGACUCAUUGtc | 137 |
| WNK2   | NM_006648    | CGUAUAUGGUGGAGCAUGAtt  | UCAUGCUCACCAUAUACGtg  | 168 |
| WNK2   | NM_006648    | CUAUAAGUCUAGUAGCAAAtt  | UUUGCUACUAGACUUAUAGgt | 165 |
| WNK2   | NM_006648    | GGAGUAUGCUAGGCUAUGAtt  | UCAUAGCCUAGCAUACUCctg | 153 |
| WNK3   | NM_001002838 | GCCUCACGUUUGUCAGUAUtt  | AUACUGACAAACGUGAGGCat | 194 |
| WNK3   | NM_001002838 | GAAGAUUGGUGAUCUAGGAtt  | UCCUAGAUCACCAAUCUUCac | 230 |
| WNK3   | NM_001002838 | GGAGUUUGCAGACAACCGAtt  | UCGGUUGUCUGCAAACUCCag | 236 |
| WNK4   | NM_032387    | GGCUUUUGCCCUAUCCAUUt   | AAUGGAUAGGGCAAAGCCga  | 159 |
| WNK4   | NM_032387    | AGAUGUACGAGGAAAAGUAtt  | UACUUUUCUCUGUACAUCUcg | 69  |
| WNK4   | NM_032387    | ACAUCGUCCGCUUCAUGAtt   | UCAUAGAAGCGGACGAUGUtg | 133 |
| XYLB   | NM_005108    | GGAGGAGCAUCUCACAAUAtt  | UAUUGUGAGAUGCUCUCctg  | 143 |
| XYLB   | NM_005108    | GCAUCUCACAAUAGAGAAAtt  | UUUCUCUAUUGUGAGAUGCtc | 187 |
| XYLB   | NM_005108    | GUGUGCAUUUUGACAGAGAtt  | UCUCUGUCAAAAUGCACActt | 165 |
| YES1   | NM_005433    | CAGGUAUGGUGAACCGUGAtt  | UCACGGUUCACCAUACCUgga | 97  |
| YES1   | NM_005433    | CCACGAAAGUAGCAAUCAAtt  | UUGAUUGCUACUUUCGUGGtt | 178 |
| YES1   | NM_005433    | GUAUGGUCGGUUUACAAUAtt  | UAUUGUAAACCGACCAUAcag | 263 |
| YSK4   | NM_001018046 | CCACACUGGUUAAUGAAGAtt  | UCUUCAUUAACCAGUGUGGaa | 113 |
| YSK4   | NM_001018046 | GGUACAUCGCGAUAUCAAAtt  | UUUGAUUUCGCGAUGUACCac | 211 |
| YSK4   | NM_001018046 | GAAAUAAUGUUUUGCUCAUtt  | AUGAGCAUAACAUAUUUUCct | 147 |
| ZAK    | NM_133646    | GGGAGAUGCUAACAAGGGAtt  | UCCCUUGUUAGCAUCUCCcag | 114 |
| ZAK    | NM_133646    | GGAUUAUCACAGGACAAGGAtt | UCCUUGUCCUGUGAUAUCCat | 68  |
| ZAK    | NM_133646    | GGAUCACUCUAUGAUUACAtt  | UGUAAUCAUAGAGUGAUCCca | 152 |
| ZAP70  | NM_001079    | AGAACUUUGUGCACCGUGAtt  | UCACGGUGCACAAAGUUCUtc | 80  |
| ZAP70  | NM_001079    | GAACUGUACGCACUCAUGAtt  | UCAUGAGUGCGUACAGUUCgg | 125 |
| ZAP70  | NM_001079    | GCGCGAUUACCUCCUCAUAtt  | UAUGAGGAGGUUAUCGCGCtt | 212 |
| ZC3HC1 | NM_016478    | GAACAACCUUCAUUGGAAUtt  | AUUCCAAUGAAGGUUGUUCcg | 190 |
| ZC3HC1 | NM_016478    | CAAGGAAAGUAUUCGGAAUtt  | AUUCGGAAUACUUUCCUUGat | 260 |
| ZC3HC1 | NM_016478    | CACUCGUCUGUGCAAAAUAtt  | UAUUUUGCACAGACGAGUGga | 93  |

|        |           |                       |                       |     |
|--------|-----------|-----------------------|-----------------------|-----|
| ZMYND8 | NM_012408 | CUAUCACGACGAAAACGGAtt | UCCGUUUUCGUCGUGAUAGGa | 157 |
| ZMYND8 | NM_012408 | CGAUAGUGAGUAUAUCAGUtt | ACUGAUUAUCUCACUAUCGct | 249 |
| ZMYND8 | NM_012408 | GCUCCUAUCACGACGAAAAtt | UUUUCGUCGUGAUAGGAGCtg | 219 |
