# Supplementary material for: Automated High-Throughput RNAi Screening in Human Cells Combined with Reporter mRNA Transfection to Identify Novel Regulators of Translation
Source: PubMed Central journal article supplement (PMC3459937; doi:10.1371/journal.pone.0045943), 2012-09-27
Supplement: pone.0045943.s004.pdf [file pone.0045943.s004.pdf]

## Supplementary table 2

| Gene Symbol | RefSeq Accession Number | Sense siRNA Sequence 5'-3' | Antisense siRNA Sequence 5'-3' | Normalized luciferase values |
|-------------|-------------------------|----------------------------|--------------------------------|------------------------------|
| ACP1        | NM_004300               | GGGUAACAUUUUGUCGAUCAAtt    | UGAUCGACAAAUGUUACCCag          | 302                          |
| ACP1        | NM_004300               | GGAAACUUGUAACCGAUCAAtt     | UGAUCGGUUACAAGUUUCCtg          | 241                          |
| ACP1        | NM_001040649            | AACUUGUAACCGAUCAAAAAtt     | UUUUGAUCGGUUACAAGUUtc          | 173                          |
| ACP2        | NM_001610               | GUAUCAGAAUGAGAGUUCUtt      | AGAACUCUCAUUCUGAUACtc          | 125                          |
| ACP2        | NM_001610               | GGACUCUCAUGAGUGCUGAtt      | UCAGCACUCAUGAGAGUCCgg          | 246                          |
| ACP2        | NM_001610               | CGGAGUCUGCGCUUCGUUAtt      | UAACGAAGCGCAGACUCCGgg          | 224                          |
| ACP5        | NM_001611               | AGAUSCCACAGACCAAUGUtt      | ACAUUGGUCUGUGGGAUCUtg          | 282                          |
| ACP5        | NM_001611               | CCCAGAUUGCAUACUCUAAtt      | UUAGAGUAUGCAAUCUGGGca          | 321                          |
| ACP5        | NM_001611               | UGACCGCUCCCUUCGCAAAtt      | UUUGCGAAGGGAGCGGUCAga          | 175                          |
| ACP6        | NM_016361               | GCACGGAUGAUCGAACAGAtt      | UCUGUUCGAUCAUCCGUGCaa          | 81                           |
| ACP6        | NM_016361               | CACUAACAUUUUUCGGAAUtt      | AUUCGAAAAAUGUUAGUGga           | 268                          |
| ACP6        | NM_016361               | CUGGUGGUCCGAAACCAUAtt      | UAUGGUUUCGGACCACCAGct          | 230                          |
| ACPL2       | NM_001037172            | CUCCUACGUUUGAAAAACAtt      | UGUUUUUCAAACGUAGGAGgt          | 108                          |
| ACPL2       | NM_001037172            | CACUGUAUGUCAUUCCCAAtt      | UUGGGAAUGACAUAACAGUGgg         | 172                          |
| ACPL2       | NM_001037172            | GCUAUUGCCCGGUAAGAAAtt      | UUUCUUAACCGGGCAAUAGCag         | 211                          |
| ACPP        | NM_001099               | GCUGCACCCUUUAAGGAUtt       | AUCCUUUAAGGGUGCAGCct           | 370                          |
| ACPP        | NM_001099               | GGACUUUGAUGAGUGCUAUtt      | AUAGCACUCAUCAAGUCCgg           | 198                          |
| ACPP        | NM_001099               | GCUAGAUGUUUACAACGGAtt      | UCCGUUGUAAACAUCUAGCgc          | 227                          |
| ACPT        | NM_033068               | AGAUCUCGGCUUUGGAUAUtt      | AUAUCCAAAGCCGAGAUCUgg          | 154                          |
| ACPT        | NM_033068               | GACUGUCGCUUGGUUGGAGAtt     | UCUCCAACCAGCGACAGUCcc          | 276                          |
| ACPT        | NM_033068               | AGCCACGGUCUCCACUAtt        | UAGUGGAAGACCGUGGGCUtg          | 113                          |
| ACYP1       | NM_203488               | GUGUUUUUCCGUAAGCAUAtt      | UAUGC UUACGGAAAAACACcc         | 125                          |
| ACYP1       | NM_203488               | GGUGCGUCAUAUGCAGGAAtt      | UUCCUGCAUAUGACGCACctt          | 377                          |
| ACYP1       | NM_203488               | GAGGAAGUCCUAAAUCACAtt      | UGUGAUUUAGGACUUCUCtt           | 53                           |
| ACYP2       | NM_138448               | CAUUGACCGCACAAACUUUtt      | AAAGUUUGUGCGGUCAAUGcg          | 77                           |
| ACYP2       | NM_138448               | GGUGAAGAAUACCAGCAAAtt      | UUUGCUGGUUAUUCUUCACCca         | 251                          |
| ACYP2       | NM_138448               | CUUCAGAAUGUAUACAGAAtt      | UUCUGUAUACAUUCUGAAGca          | 186                          |
| ALPI        | NM_001631               | GACAUACAAUGUGGACAGAtt      | UCUGUCCACAUUGUAUGUCtt          | 89                           |
| ALPI        | NM_001631               | CGUCCAUCCUGUACGGCAAtt      | UUGCCGUACAGGAUGGACGtg          | 173                          |
| ALPI        | NM_001631               | GGGCUACGUGUUCAACUCAAtt     | UGAGUUGAACACGUAGCCCgg          | 178                          |
| ALPL        | NM_000478               | CUGCCUUACUAACUCCUUAtt      | UAAGGAGUUAGUAAGGCAGgt          | 76                           |
| ALPL        | NM_000478               | GUAUGAGAGUGACGAGAAAtt      | UUUCUCGUCACUCUCAUACtc          | 167                          |

|          |           |                        |                        |     |
|----------|-----------|------------------------|------------------------|-----|
| ALPL     | NM_000478 | CAAGCGCAAGAGACACUGAtt  | UCAGUGUCUCUUGCGCUUGgt  | 93  |
| ALPP     | NM_001632 | GGACACUGGGCAUAGAUUUtt  | AAAUUCUAUGCCCAGUGUCCag | 123 |
| ALPP     | NM_001632 | GGAAGUGUUUGUAAUCCCAtt  | UGGGAUUACAAACACUUCct   | 150 |
| ALPP     | NM_001632 | GCACCCAACUGAGAUCGGAAtt | UCGGAUCUCAGUUGGGUGCtg  | 60  |
| ALPPL2   | NM_031313 | GGACAUUGAUGUGAUCCUAtt  | UAGGAUCACAUCAUUGUCCat  | 78  |
| ALPPL2   | NM_031313 | AGACAUACAGUGUAGACAAtt  | UUGUCUACACUGUAUGUCUtg  | 451 |
| ALPPL2   | NM_031313 | CCACUGGGCUAAUUCUACAtt  | UGUAGAAUUAGCCCAGUGGag  | 179 |
| ANP32A   | NM_006305 | UCACAUAUCUCGACGGCUAtt  | UAGCCGUCGAGAUUUGUGAgt  | 88  |
| ANP32A   | NM_006305 | UGAACUAAGCGAUAAACAGAtt | UCUGUUAUCGCUUAGUUCAag  | 211 |
| ANP32A   | NM_006305 | CAAUCGCAAACUUAACAAAtt  | UUUGGUAAGUUUGCGAUUGag  | 133 |
| ANP32B   | NM_006401 | CCUUGGAACCUUUGAAAAAtt  | UUUUUCAAAAGGUUCCAAGGtg | 129 |
| ANP32B   | NM_006401 | GUCUGGACAUGUUAGCUGAtt  | UCAGCUAACAUGUCCAGACct  | 392 |
| ANP32B   | NM_006401 | AGAGUUCUCAGUUUAAUAtt   | UAUUAAACUGAGGAACUCUaa  | 150 |
| ANP32C   | NM_012403 | GGACAACAGUCGGUCGAAUtt  | AUUCGACCGACUGUUGUCCag  | 95  |
| ANP32C   | NM_012403 | CUGGAAUUCUUAAGUAAAAtt  | UUUUACUUAAGAAUCCAGtt   | 101 |
| ANP32C   | NM_012403 | GAACUGGAAUUCUUAAGUAtt  | UACUUAAGAAUCCAGUUCtt   | 104 |
| ANP32D   | NM_012404 | CCUCAUACAUCUAAAUUUAtt  | UAAAUUUAGAUGUAUGAGGtt  | 122 |
| ANP32D   | NM_012404 | GGACAACAGUCAGUCAAAUtt  | AUUUGACUGACUGUUGUCCag  | 115 |
| ANP32D   | NM_012404 | GCCUCACCUCAAUUGCAAAtt  | UUUGCAAUUGAGGUGAGGCct  | 172 |
| ANP32E   | NM_030920 | GAUUUGAUCAGGAGGAUAAtt  | UUAUCCUCCUGAUCAAAUCca  | 126 |
| ANP32E   | NM_030920 | CUGUUUAACUGUGAGAUCAtt  | UGAUCUCACAGUUAACAGgt   | 158 |
| ANP32E   | NM_030920 | GAGCUUAGUGAUAAUAUAAtt  | UUAUAUUUAUCACUAAGCUCca | 143 |
| ASNA1    | NM_004317 | GCCCUUUCAUCUCACAGAUtt  | AUCUGUGAGAUGAAAGGGCtg  | 153 |
| ASNA1    | NM_004317 | GGCUUAUGCAGAUCAAGAAtt  | UUCUUGAUCUGCAUAAGCCgg  | 271 |
| ASNA1    | NM_004317 | CAACAUCUCAGAUUCUUUtt   | AAAAGCAUCUGAGAUGUUGtg  | 520 |
| ATP6V0E1 | NM_003945 | UGCCUUGGUUCAUCCCUAAtt  | UUAGGGGAUGAACCAAGGCAcc | 95  |
| ATP6V0E1 | NM_003945 | CCCUCUCUUUGGACCGCAAtt  | UUGCGGUCCAAGAGAGGGtt   | 170 |
| ATP6V0E1 | NM_003945 | GACCGCAAUUGAAAAUAGAtt  | UCAUUUUUCAAUUGCGGUCca  | 160 |
| ATP6V0E2 | NM_145230 | GCCGUCUGCUGUUACCUCUtt  | AGAGGUAACAGCAGACGGCgg  | 148 |
| ATP6V0E2 | NM_145230 | GCGGAGUGAUCAUACCAUtt   | AUGGUGAUGAUCACUCCGCgg  | 244 |
| ATP6V0E2 | NM_145230 | ACGUCUAGAUGUGAAAUUtt   | AAAUUUCACAUCUAGACGUgt  | 93  |
| BPNT1    | NM_006085 | GAGGAAUUAUGACUACUAUtt  | AUAGUAGUCAUAAUCCUCag   | 284 |
| BPNT1    | NM_006085 | CAUAUUCUAUUGCUCAAAAtt  | UUUUGAGCAAUAGAAUAUGcg  | 128 |
| BPNT1    | NM_006085 | GAAUGAUAGUCAGACGUGUtt  | ACACGUCUGACUAUCAUUCct  | 145 |
| C21orf6  | NM_016940 | GGAGAUGUUUGUAUACUGAtt  | UCAGUAUACAACAUCUCCat   | 136 |
| C21orf6  | NM_016940 | CUCUAUCAGUUCUUAACAtt   | UGUUUAAGAACUGAUAGAGct  | 120 |

|         |              |                          |                        |     |
|---------|--------------|--------------------------|------------------------|-----|
| C21orf6 | NM_016940    | GGAUGUAUCUGACGAAAAAtt    | UUUUUCGUCAGAUACAUCcag  | 134 |
| C3orf48 | NM_144714    | GGAGUGUCAUUAUUCUCAtt     | UGAGAAUUAUUGACACUCctg  | 168 |
| C3orf48 | NM_144714    | CAAUACCAGCAUACUAUAtt     | UAUAGUAUGCUGGUUUUgtt   | 91  |
| C3orf48 | NM_144714    | CACAUUACCCUGUUCCAUAtt    | UAUGGAACAGGGUAAUGUGgt  | 251 |
| CABIN1  | NM_012295    | GGAUUGAUUUUGUCGGACUAtt   | UAGUCCGACAAAUCAAUCCtt  | 169 |
| CABIN1  | NM_012295    | GGAUUGCCGGUACAGCAAAtt    | UUUGCUGUACCGGCAAUCctt  | 287 |
| CABIN1  | NM_012295    | GCGAUUCUAUGUGCGAGUAtt    | UACUCGCACAUAGAAUCGCag  | 199 |
| CANT1   | NM_138793    | UGAUUGUUUUCAAUGGGAAtt    | UUCCCAUUGAAAACAAUCAgg  | 164 |
| CANT1   | NM_138793    | ACCUGGUUCAGUUACCUGAtt    | UCAGGUAACUGAACCCAGGUgt | 299 |
| CANT1   | NM_138793    | GAAUCGCAGUUUUCGCAGAtt    | UCUGCGAUAAACUGCGAUUCga | 191 |
| CCDC104 | NM_080667    | GAAGAGAUGAAAAUCCUGAtt    | UCAGGAUUUUUCAUCUCUUCgt | 138 |
| CCDC104 | NM_080667    | GCAUUUUUGC UAAUCAGUCAAtt | UGACUGAUUAGCAAAAUGCat  | 246 |
| CCDC104 | NM_080667    | GCAAAUUGACCUAUACAGAtt    | UCUGUAUAGGUCAAUUUGCtt  | 192 |
| CDC14A  | NM_033313    | CCUAUGCAGUAAUCUAUUUtt    | AAAUAGAUUACUGCAUAGGca  | 173 |
| CDC14A  | NM_033313    | GUUCAUGAAAGAUCGGUUAtt    | UAACCGAUCUUUCAUGAACtc  | 305 |
| CDC14A  | NM_033313    | CUACACCUUUUUUGACCAAtt    | UUGGUCAAACAGGUGUAGtg   | 189 |
| CDC14B  | NM_003671    | AGAAUUCUAGAUUUCUGUtt     | ACAGAUUUCUAGGAAUUCUtt  | 138 |
| CDC14B  | NM_003671    | AGAUCAGCAAGAACCCGAAtt    | UUCGGGUUCUUGCUGAUCUtg  | 192 |
| CDC14B  | NM_003671    | AGACAUCCUAUAUUCUUUtt     | AAAGGAAUAUAGGAUGUCUct  | 224 |
| CDC14C  | XM_001125780 | AACAUUCUCCCGAGACUUAtt    | UAAGUCUCGGGAGAAUGUUgg  | 201 |
| CDC14C  | XM_001125780 | GAAAAGGCGAAGACAAUCAtt    | UGAUUGUCUUCGCCUUUUCag  | 311 |
| CDC14C  | XM_001125780 | AGGCGAAGACAAUCAAAAAAtt   | UUUUUGAUUGUCUUCGCCUtt  | 114 |
| CDC25A  | NM_201567    | GGGUUAUCUCUUUCAUACAtt    | UGUAUGAAAGAGAUAAACCtt  | 152 |
| CDC25A  | NM_201567    | CAAGGGACCUUAUAGGAGAtt    | UCUCCUAUAAGGUCCCUUGgg  | 337 |
| CDC25A  | NM_201567    | CAUCGACUGUCGAUACCCAtt    | UGGGUAUCGACAGUCGAUGat  | 130 |
| CDC25B  | NM_021873    | GGAUCAUUCGAAACGAGCAtt    | UGCUCGUUUCGAAUGAUCCgg  | 101 |
| CDC25B  | NM_021873    | GAGAGCUGAUUGGAGAUUAtt    | UAAUCUCCAAUCAGCUCUCgg  | 126 |
| CDC25B  | NM_021873    | GCAACAUCGUGGAUAAGUUtt    | AACUUAUCCACGAUGUUGCtg  | 51  |
| CDC25C  | NM_001790    | CAGGGAGCCUUAACUUAUtt     | AUAAGUUUAAGGCUCCCUGga  | 62  |
| CDC25C  | NM_001790    | CCUUUACCGUCUGUCCAGAtt    | UCUGGACAGACGGUAAAGGaa  | 167 |
| CDC25C  | NM_001790    | GAACUCCAGUGGGCAAUUtt     | AAUUUGCCCACUGGAGUUCta  | 68  |
| CDKN3   | NM_005192    | CCUUAAAAUUACCGAAAAAtt    | UUUUCGGUAAUUUUUAAGGca  | 202 |
| CDKN3   | NM_005192    | GACUCCAAUUCAUAUAUCAtt    | UGAUUAUUGAAUUGGAGUCtg  | 110 |
| CDKN3   | NM_005192    | CCAUCAAGCAAUACAUAUAtt    | UAAUUGUAUUGCUUGAUGGtc  | 82  |
| CHP     | NM_007236    | GAGUAAAUUUCUCAGAUGAtt    | UCAUCUGAGAUUUUACUCcg   | 111 |
| CHP     | NM_007236    | AGAUGUGAAUGGACCCGAAtt    | UUCGGGUCCAUUCACAUCUtt  | 319 |

|        |              |                        |                        |     |
|--------|--------------|------------------------|------------------------|-----|
| CHP    | NM_007236    | GCAUGAUGGUCGGAGUAAAtt  | UUUACUCCGACCAUCAUGCgt  | 136 |
| CHTF18 | NM_022092    | UGGACAUUCUUGCACCCAAtt  | UUGGGUGCAAGAAUGUCCAgg  | 129 |
| CHTF18 | NM_022092    | CAGCACCCGUGAAAAGCAAtt  | UUGCUIUUUCACGGGUGCUGta | 111 |
| CHTF18 | NM_022092    | AGGGCUUGUUUGACAACUUt   | AAGUUGUCAAAACAAGCCCUgg | 69  |
| CIB2   | NM_006383    | GACUGCACCUUCUUCAAUAtt  | UAUUGAAGAAGGUGCAGUCct  | 143 |
| CIB2   | NM_006383    | GGAAAAGCAGAUAAACCCAAtt | UUGGGUUAUCUGCUUUUCCct  | 167 |
| CIB2   | NM_006383    | GCUGCAUUCGCGAUUCUAUtt  | AUAGAAUCGCGAAUGCAGCtt  | 217 |
| CIB3   | NM_054113    | GGCUUACUAUGCUUUUAAAtt  | UUUAAAAGCAUAGUAAGCCtt  | 127 |
| CIB3   | NM_054113    | UGUUUUCGUGAUGAGUGAtt   | UCACUCAUCACGGAAAACAtg  | 112 |
| CIB3   | NM_054113    | GGAGCAGACGGUGACCAAAtt  | UUUGGUCACCGUCUGCUCcag  | 131 |
| CTDP1  | NM_048368    | GACUCAAUUGGUUUGCAUUAtt | UAAUGCAAACCAUUGAGUCtc  | 207 |
| CTDP1  | NM_048368    | CAAACUUCCCGAUAGAGAAtt  | UUCUCUAUCGGGAAGUUUGtc  | 277 |
| CTDP1  | NM_048368    | GGGCACGGGUGAUUGAAUtt   | AUUCAUAUCACCCGUGCCctg  | 130 |
| CTDSP1 | NM_182642    | GCCCAGGACUCAGACAAGAtt  | UCUUGUCUGAGUCCUGGGCct  | 109 |
| CTDSP1 | NM_182642    | CGGACUUCAUCAUCCCUGUtt  | ACAGGGAUUGAUGAAGUCCGcg | 109 |
| CTDSP1 | NM_182642    | GCCUCGUGGUUUGACAACAtt  | UGUUGUCAAAACCACGAGGCca | 126 |
| CTDSP2 | NM_005730    | CGUAUAAGGAGGAAGCAAAtt  | UUUGCUUCCUCCUUAUACGca  | 156 |
| CTDSP2 | NM_005730    | ACAUCUUCAAGGCCCUUUUtt  | AAAAGGGCCUUGAAGAUGUta  | 101 |
| CTDSP2 | NM_005730    | UGACCUCGAUGAAACCCUUt   | AAGGGUUUCAUCGAGGUCAat  | 111 |
| CTDSPL | NM_005808    | GCCUAUUAGUAAUUGCUGAUtt | AUCAGCAUUACUAAUAGGCtt  | 148 |
| CTDSPL | NM_005808    | GGUCAUUGAUUUAGAUGAAtt  | UUCAUCUAAAUCAUAGACCac  | 88  |
| CTDSPL | NM_005808    | CACAGUUCGUUUAAAGCCUAtt | UAGGCUUAAACGAACUGUGca  | 130 |
| DOLPP1 | NM_020438    | CAGUUUAUGUGGUUCUUCUtt  | AGAAGAACCACAUAAACUGgg  | 333 |
| DOLPP1 | NM_020438    | AGUUCUUCUAAUCCGAGAtt   | UCUCGGAUUAGGAAGAACUcg  | 380 |
| DOLPP1 | NM_020438    | AGAAUGCACCAAACAACAAtt  | UGUUUGUUUGGUGCAUUCUta  | 165 |
| DUPD1  | NM_001003892 | AGCUCUACAUUGGCGAUGAtt  | UCAUCGCCAAUGUAGAGCUtg  | 175 |
| DUPD1  | NM_001003892 | GCCUACUCAUCUGCCAAGAtt  | UCUUGGCAGAUGAGUAGGCat  | 218 |
| DUPD1  | NM_001003892 | UCCAGCAAGUGGCCAAGAAtt  | UUCUUGGCCACUUGCUGGAtg  | 120 |
| DUSP1  | NM_004417    | CCACCACCGUGUUCAACUUt   | AAGUUGAACACGGUGGUGGtg  | 166 |
| DUSP1  | NM_004417    | GGACUAAUCGAGUCAAGCUtt  | AGCUUGACUCGAUUAGUCCtc  | 318 |
| DUSP1  | NM_004417    | AGGCCUUUGAGUUUGUGAAtt  | UUCACAAACUCAAGGCCUcg   | 392 |
| DUSP10 | NM_007207    | AGAAAGGCCUGUUCAACUAtt  | UAGUUGAACAGGCCUUUCUca  | 120 |
| DUSP10 | NM_007207    | GACCAUGACUGAUGCUIAUtt  | AUAAGCAUCAGUCAUGGUCat  | 217 |
| DUSP10 | NM_007207    | AGUUCGAGGAAGACCUAAAtt  | UUUAGGUCUUCUCGAACUct   | 123 |
| DUSP11 | NM_003584    | GGACUCGUUUUCAUUGCUIUtt | AAAGCAAUGAAACGAGUCCca  | 174 |
| DUSP11 | NM_003584    | GACCCAAAGUUUGCAACAAtt  | UUGUUGCAAACUUUGGGUCtg  | 133 |

|        |              |                        |                        |     |
|--------|--------------|------------------------|------------------------|-----|
| DUSP11 | NM_003584    | GAUAAUUGAUUGAUGUAGAtt  | UCUACAUCAAAUCAAUAUCtg  | 218 |
| DUSP12 | NM_007240    | GGAAUACACCUGCUUUUCAtt  | UGAAAAGCAGGUGUUAUCCac  | 127 |
| DUSP12 | NM_007240    | AGGCGAUCAUUUUUCGAAtt   | UUCGAAAUAUAUGAUCGCCUgc | 299 |
| DUSP12 | NM_007240    | GAAGUGGACCUAUAGCCUUt   | AAGGCUAUAGGUCCACUUCct  | 286 |
| DUSP13 | NM_016364    | CAAUAUCUGCCCUAACUCAtt  | UGAGUUAGGGCAGAUUUUgcg  | 146 |
| DUSP13 | NM_016364    | GAAUGUCCCUGGAGUACUAtt  | UAGUACUCCAGGGACAUUCca  | 171 |
| DUSP13 | NM_016364    | CACUGAACCAUAUCGAUGAtt  | UCAUCGAUAUGGUUCAGUGtg  | 275 |
| DUSP14 | NM_007026    | CAUUGUUAUUGCUACCAUUt   | AAUGGUAGCAUUAACAAUGca  | 138 |
| DUSP14 | NM_007026    | GGAAGUCGACAGUUAAAAUt   | AUUUUAAUCUGUCGACUUCca  | 226 |
| DUSP14 | NM_007026    | GGAGGCAACUGAUAGACUAtt  | UAGUCUAUCAGUUGCCUCCag  | 215 |
| DUSP16 | NM_030640    | GGUUGUAGUUUACGAUCAAtt  | UUGAUCGUAAACUACAACct   | 167 |
| DUSP16 | NM_030640    | GCUGGAAAGUGGAACGGAAtt  | UUCCGUCCACUUUCCAGCag   | 175 |
| DUSP16 | NM_030640    | GGACAAAGUGUUAAUUACAtt  | UGUAAUUAACACUUUGUCct   | 375 |
| DUSP18 | NM_152511    | AGCUCAUGCUGUCUAGCAAtt  | UUGCUAGACAGCAUGAGCUtg  | 85  |
| DUSP18 | NM_152511    | GCCUCUCGCAGAUAAACCAAtt | UUGGUUAUCUGCGAGAGGCcg  | 66  |
| DUSP18 | NM_152511    | AGUACAUGCAGGUACCUGUt   | ACAGGUACCUGCAUGUACUgg  | 113 |
| DUSP19 | NM_080876    | GACUUUACAUAUAAGAGCAtt  | UGCUCUUAUAUGUAAAGUCac  | 74  |
| DUSP19 | NM_080876    | GACCUUCCAUAUGUCCAAAtt  | UUUGGACAUUAUGGAAGGUct  | 170 |
| DUSP19 | NM_080876    | GGAGCAGCUUCGUACAUAUt   | AUAUGUACGAAGCUGCUCCat  | 248 |
| DUSP2  | NM_004418    | GUCCCGAUCUGUGCUCUGAtt  | UCAGAGCACAGAUCGGGACag  | 239 |
| DUSP2  | NM_004418    | ACUUAGCACUUUAUAUUUt    | UAAAUUAAGUGCUAAGUtt    | 190 |
| DUSP2  | NM_004418    | GGCCUUUUCGCUACAAGAtt   | UCUUGUAGCGGAAAAGGCCct  | 213 |
| DUSP21 | NM_022076    | GGUGGAAGUGGUCAACGUAtt  | UACGUUGACCACUUCACCga   | 144 |
| DUSP21 | NM_022076    | CAACAACGGCUUUUGGGAAtt  | UUCCCAAAAGCCGUUGUUGgg  | 167 |
| DUSP21 | NM_022076    | GGGAACAGCUCAUCAAUUAtt  | UAAUUGAUGAGCUGUUCcCaa  | 138 |
| DUSP22 | XM_001132925 | AGCUCUAUGUUUUCGUUAAtt  | UUAACGAAAACAUAGAGCUtt  | 110 |
| DUSP22 | XM_001132925 | GCAUACAUCAUGACCGUCAtt  | UGACGGUCAUGAUGUAUGCga  | 197 |
| DUSP22 | XM_001132925 | UGACACUGGUGAUCGCAUAtt  | UAUGCGAUCACCAGUGUCAcg  | 149 |
| DUSP23 | NM_017823    | GAAGUGGACUAAAGUAUUAtt  | UAAUACUUUAGUCCACUUCcc  | 135 |
| DUSP23 | NM_017823    | GGAAGUGGACUAAAGUAUUUt  | AAUACUUUAGUCCACUUCct   | 232 |
| DUSP23 | NM_017823    | GCCCACUACCAGUUCUGUt    | ACAGGAACUGGUAGUGGGCgg  | 356 |
| DUSP26 | NM_024025    | CUCCUCACCAAACAAAAtt    | UUUUGUUUUGGUGAGGGAGag  | 69  |
| DUSP26 | NM_024025    | GGGAUACGGCAAGCAUGAAtt  | UUCAUGCUUGCCGUAUCCctg  | 88  |
| DUSP26 | NM_024025    | UCCGCUACCUGGGUGUUGAtt  | UCAACACCCAGGUAGCGGAtg  | 143 |
| DUSP28 | NM_001033575 | CGGAUUAGAUGUUGCUAUAtt  | UAUAGCAACAUCUAAUCCGga  | 306 |
| DUSP28 | NM_001033575 | GCAAGAGGGUUGUAUAUUUt   | AAAUAUACAACCCUCUUGCct  | 195 |

|        |              |                       |                       |     |
|--------|--------------|-----------------------|-----------------------|-----|
| DUSP28 | NM_001033575 | GGUUGUAUUAUUUCCCGUUtt | AACGGGAAAAUAUACAACCct | 197 |
| DUSP3  | NM_004090    | GAACCCUCCUAAAUCCAUAtt | UAUGGAUUUAGGAGGGUUCtc | 157 |
| DUSP3  | NM_004090    | AGGACUCCGGCAUCACAUAtt | UAUGUGAUGCCGGAGUCCUtg | 185 |
| DUSP3  | NM_004090    | GGUCCUUCAUGCAGUCAAtt  | UUGACGUGCAUGAAGGACCtg | 145 |
| DUSP4  | NM_001394    | GAAGGACACUAUCAGUACAtt | UGUACUGAUAGUGUCCUUCaa | 119 |
| DUSP4  | NM_001394    | GCAGUUCGUCUUCAGCUUtt  | AAAGCUGAAGACGAACUGCga | 213 |
| DUSP4  | NM_001394    | CCACUUUGAAGGACACUAUtt | AUAGUGUCCUUCAAAGUGGtt | 61  |
| DUSP5  | NM_004419    | GAGUGUUGCGUGGAUGUAAtt | UUACAUCCACGCAACACUCag | 84  |
| DUSP5  | NM_004419    | UGCAGACACUGAGCCCUGAtt | UCAGGGCUCAGUGUCUGCAaa | 70  |
| DUSP5  | NM_004419    | CGGCUGACAUUAGCUCCCAtt | UGGGAGCUAAUGUCAGCCGtg | 204 |
| DUSP6  | NM_001946    | CGGACACUAUUUACACUAAtt | UUAGUGAUAAUAGUGUCCGta | 272 |
| DUSP6  | NM_001946    | GAACUGUGGUGUCUUGGUAtt | UACCAAGACACCACAGUUCtt | 130 |
| DUSP6  | NM_001946    | AGCUCAAUCUGUCGAUGAAtt | UUCAUCGACAGAUUGAGCUtc | 85  |
| DUSP7  | NM_001947    | AGAUGAACUGUCACUCAAtt  | UUGAGUGACAGGUUCAUCUtc | 63  |
| DUSP7  | NM_001947    | ACAAGUUUCAAACAGAGUAtt | UACUCUGUUUGAAACUUGUtg | 229 |
| DUSP7  | NM_001947    | AGUCCAACAUCUCGCCCAAtt | UUGGGCGAGAUGUUGGACUtt | 274 |
| DUSP8  | NM_004420    | CAACGACAACUACUGUGAAtt | UUCACAGUAGUUGUCGUUGat | 105 |
| DUSP8  | NM_004420    | CCAUCGAGUUCAUCGAUAAtt | UUAUCGAUGAACUCGAUGGac | 276 |
| DUSP8  | NM_004420    | CGACAACUACUGUGAAAAAtt | UUUUUCACAGUAGUUGUCGtt | 131 |
| DUSP9  | NM_001395    | GACUUUCACUACAAGCAGAtt | UCUGCUUGUAGUGAAAGUCac | 153 |
| DUSP9  | NM_001395    | CAAACUUCUUCGAGAAGAAtt | UUCUUCUCGAAGAAGUUUGgg | 115 |
| DUSP9  | NM_001395    | CUCUCUCAACGAUGCCUAUtt | AUAGGCAUCGUUGAGAGAGag | 157 |
| DUT    | NM_001948    | GCUCAUUUGCGAACGGAUUtt | AAUCCGUUCGCAAUGAGCtg  | 102 |
| DUT    | NM_001948    | CCUUCUGGGUGUUAUGGAAtt | UUCCAUAACACCCAGAAGGga | 272 |
| DUT    | NM_001948    | AGAUUAUAGAGGAAAUGUUtt | AACAUUUCCUCUAUAAUCUtc | 73  |
| ENOPH1 | NM_021204    | GCAACGCAGGAUUAACAGAtt | UCUGUUAUCCUGCGUUGCct  | 137 |
| ENOPH1 | NM_021204    | GGAUGAAGGUGUACAUCUtt  | AGAUGUACACCUUCAUUCGgg | 161 |
| ENOPH1 | NM_021204    | GAGAGUGAAAGUUACCGAAtt | UUCGGUAACUUUCACUCUCta | 233 |
| ENTPD1 | NM_001776    | GGCAUUUACCUGACUGAUUtt | AAUCAGUCAGGUAAAUGCCta | 144 |
| ENTPD1 | NM_001776    | GGUUCAGCAUAGUCCCAUAtt | UAUGGGACUAUGCUGAACcac | 230 |
| ENTPD1 | NM_001776    | GCUGGAUUACUAUCAACUAtt | UAGUUGAUAGUAAUCCAGCca | 183 |
| ENTPD2 | NM_203468    | GGAUGUGCCCAAAGAGAGAtt | UCUCUCUUUGGGCACAUCCtg | 142 |
| ENTPD2 | NM_203468    | CGUCCAUGUUUAUCUACAAtt | UUGUAGAUAAACAUGGACGtg | 378 |
| ENTPD2 | NM_203468    | GCUUCAGGAUGUGCCCAAAtt | UUUGGGCACAUCCUGAAGCgc | 170 |
| ENTPD3 | NM_001248    | CCCUCGCUUUCUUCACAGUtt | ACUGUGAAGAAAGCGAGGGtg | 173 |
| ENTPD3 | NM_001248    | GCAGAAUUCUCCUACCAAAtt | UUUGGUAGGAGAAUUCUGCag | 177 |

|          |              |                        |                        |     |
|----------|--------------|------------------------|------------------------|-----|
| ENTPD3   | NM_001248    | CCAGGACUGAAGUAUGGUAtt  | UACCAUACUUCAGUCCUGGag  | 186 |
| ENTPD4   | NM_004901    | GUAUGGGCGACUAACCAGAtt  | UCUGGUUAGUCGCCAUActt   | 140 |
| ENTPD4   | NM_004901    | GACCCGCUUUCUACCGUUAtt  | UAACGGUAGAAAGCGGGUCct  | 231 |
| ENTPD4   | NM_004901    | GAAGCUACAGACACCAAUAtt  | UAUUGGUGUCUGUAGCUUCaa  | 137 |
| ENTPD5   | NM_001249    | GCAUCAUGGAUGGAUCCGAtt  | UCGGAUCCAUCAUGAUGCta   | 156 |
| ENTPD5   | NM_001249    | CACCUUUCUGGUACCAAAtt   | UUUGGUACCAGGAAAGGUGac  | 196 |
| ENTPD5   | NM_001249    | GUCUUACAGCUCACAAAGAtt  | UCUUUGUGAGCUGUAAGACtg  | 160 |
| ENTPD6   | NM_001247    | AGAGGUCCUUCAAAACAGAtt  | UCUGUUUUGAAGGACCUCUga  | 114 |
| ENTPD6   | NM_001247    | GGAAAUUGACAAUGUUGAtt   | UCAACAUUGUCAUUUUUCCga  | 207 |
| ENTPD6   | NM_001247    | CUGCGGAUGUUUAACAGGAtt  | UCCUGUUAAACAUCCGCAGtg  | 94  |
| ENTPD7   | NM_020354    | GGCAUUAUCAAUCCGUAtt    | UAGGCGAUUGAUUAUUGCCat  | 140 |
| ENTPD7   | NM_020354    | CGAGAUAGGCAAUACGAAAtt  | UUUCGUUUUGCCUAUCUCGtg  | 126 |
| ENTPD7   | NM_020354    | GGACAGUAGGGAUACUGGAtt  | UCCAGUAUCCCUACUGUCctt  | 184 |
| ENTPD8   | NM_198585    | CGGGAACUUUUAACUUCUtt   | AGAAGUUGAAAAGUUCCCGga  | 104 |
| ENTPD8   | NM_198585    | CCAGCCUCGAGUUCCGAAAtt  | UUUCGGAACUCGAGGCUGGgc  | 429 |
| ENTPD8   | NM_198585    | CUUGGAGGGUGAGACUGCAtt  | UGCAGUCUCACCCUCCAAGtg  | 114 |
| EPM2A    | NM_001018041 | GACACUAUGAUUAAACUAUtt  | AUAGUUUAAUCAUAGUGUCtg  | 123 |
| EPM2A    | NM_001018041 | CAUGUAACCAUCAAACUGAtt  | UCAGUUUGAUGGUUACAUGtt  | 175 |
| EPM2A    | NM_001018041 | GACCGUUGCUGUACUUCAtt   | UGUAAGUACAGCAACGGUCat  | 135 |
| FBP1     | NM_000507    | CCAACGACCUGGUUAUGAAtt  | UUCAUAACCAGGUCGUUGGag  | 199 |
| FBP1     | NM_000507    | GAAAGAAAUCAACUGAUGAtt  | UCAUCAGUUGAUUUUCUUUCta | 198 |
| FBP1     | NM_000507    | CUACCAACGUGACAGGUGAtt  | UCACCUGUCACGUUGGUAGaa  | 146 |
| FBP2     | NM_003837    | ACAUGGUCCAAUCCUCCUAtt  | UAGGAGGAUUGGACCAUGUtg  | 104 |
| FBP2     | NM_003837    | GCUCCUGUAUGAAUGCAAUtt  | AUUGCAUUCAUACAGGAGCcg  | 247 |
| FBP2     | NM_003837    | CCACUGAAUAUGUGCAGAAtt  | UUCUGCACAUUUCAGUGGtg   | 147 |
| FHIT     | NM_002012    | GCCGAUUUGUUUCAGACGAtt  | UCGUCUGAAACAAAUCGGCca  | 116 |
| FHIT     | NM_002012    | CGCUCUUGUGAAUAGGAAAtt  | UUUCCUAUUCACAAGAGCGaa  | 405 |
| FHIT     | NM_002012    | UAGUGUUUCUCAAACAGAtt   | UCUGUUUUGAGAAACACUAca  | 179 |
| FLJ16165 | NM_001004318 | GAGAGAUGCCCUACACUAAtt  | UUAGUGUAGGGCAUCUCUCgg  | 93  |
| FLJ16165 | NM_001004318 | GGCCGUGGAUCAUCACUAUtt  | AUAGUGAUGAUCCACGGCCgg  | 156 |
| FLJ16165 | NM_001004318 | GGCGGAAGCUCUACAUACAtt  | UGUAUGUAGAGCUUCCGCCgg  | 302 |
| FLJ32658 | NM_144688    | GGAUGGAGUGAAAAAGAGAtt  | UCUCUUUUUCACUCCAUCcgc  | 114 |
| FLJ32658 | NM_144688    | GGAACAGAAUCGCAGCCUtt   | AAGGCUGCGAUUCUGUUCctc  | 75  |
| FLJ32658 | NM_144688    | GCAGCUGAGUCAGACCUAUtt  | AUAGGUCUGACUCAGCUGctc  | 91  |
| FLJ40125 | XM_001132018 | CAUCCAGACCAAAAAGAAAtt  | UUUCUUUUUGGUCUGGAUGtt  | 209 |
| FLJ40125 | XM_001132018 | CCAACAUCACAGACCAAAAAtt | UUUUUGGUCUGGAUGUUGGtg  | 319 |

|          |              |                       |                        |     |
|----------|--------------|-----------------------|------------------------|-----|
| FLJ40125 | XM_001132018 | GUAGAGUUUUGAUUAUUAAtt | UUAAUAAUCAAAACUCUActt  | 159 |
| G6PC     | NM_000151    | GCAGGUGUAUACUACGUGAtt | UCACGUAGUAUACACCUGCtg  | 267 |
| G6PC     | NM_000151    | GAAUCUACCUUGCUGCUCAtt | UGAGCAGCAAGGUAGAUUCgt  | 221 |
| G6PC     | NM_000151    | GGUGGGUUUUGGAUACUGAtt | UCAGUAUCCAAAACCCACCag  | 92  |
| G6PC2    | NM_021176    | GAUUUACCCAAAUCACUCAtt | UGAGUGAUUUUGGGUAAAUCtg | 91  |
| G6PC2    | NM_021176    | GCUUACUACACUUUUCUAAtt | UUAGAAAAGUGUAGUAAGCtc  | 162 |
| G6PC2    | NM_021176    | UGUUUUCAAUUUAUCAGAtt  | UCUGAUUAAAUUGAAAACAaa  | 216 |
| G6PC3    | NM_138387    | GGCUUGUCGCGAAUCUUCAtt | UGAAGAUUCGCGACAAGCCaa  | 181 |
| G6PC3    | NM_138387    | GGAUCAGCCUCAUCACCGAtt | UCGGUGAUGAGGCUGAUCCag  | 170 |
| G6PC3    | NM_138387    | CCAAGAUCUCUUCUGUUtt   | AACAGAAAGAGGAUCUUGGga  | 188 |
| HDDC3    | NM_198527    | CACUGACAUUGUGGUGUUAtt | UAACACCACAAUGUCAGUGat  | 101 |
| HDDC3    | NM_198527    | AACACGUUCUGGAAAAUAAtt | UUUUUUUCCAGAACGUGUUag  | 182 |
| HDDC3    | NM_198527    | CCAUCCUUCCCAGAUUUAtt  | UAAUAUCUGGGAAGGAUGGag  | 472 |
| HDHD1A   | NM_012080    | AGAAUAUGUAUUCGCUAUtt  | AUAGCGAUUACAUAUUUCUtg  | 149 |
| HDHD1A   | NM_012080    | CGCUAUGACAAGAAUACAtt  | UGUAUUUCUUGUCAUAGCGat  | 500 |
| HDHD1A   | NM_012080    | GCCGAGAUCUGACAACAAAtt | UUUGUUGUCAGAUUCUGGCtc  | 136 |
| HDHD2    | NM_032124    | GAAUCAAGCAUUCGGUUAtt  | UAACCGGAAUGCUUGAUUCag  | 214 |
| HDHD2    | NM_032124    | GGAGCACCUCUGAUAGCAAtt | UUGCUAUCAGAGGUGCUCCat  | 226 |
| HDHD2    | NM_032124    | GCUAGUUGAUGAUCGGGCAtt | UGCCCGAUCAUCAACUAGCag  | 207 |
| HINT1    | NM_005340    | CUGCUGAUCUGGGCCUGAAtt | UUCAGGCCCCAGAUCAGCAGca | 186 |
| HINT1    | NM_005340    | GGUGGUGAAUGAAGGUUCAtt | UGAACCUUCAUUCACCACCat  | 319 |
| HINT1    | NM_005340    | GUGAUACCCAAGAAACAUAtt | UAUGUUUCUUGGGUAUCACca  | 168 |
| HINT2    | NM_032593    | GCAGCUUCUAGGACACCUAtt | UAGGUGUCCUAGAAGCUGCtg  | 298 |
| HINT2    | NM_032593    | ACCGACUUGUGAUCAACGAtt | UCGUUGAUCACAAGUCGGUat  | 190 |
| HINT2    | NM_032593    | UCAUCUGCACAUUCAUGUAtt | UACAUGAAUGUGCAGAUGAta  | 230 |
| ILKAP    | NM_030768    | GCAUCAAAACUUAUUCAGAtt | UCUGAUUAAGUUUUGAUGCaa  | 138 |
| ILKAP    | NM_030768    | CAUGCAGCCUUAAGCCUCAtt | UGAGGCUUAAGGCUGCAUGtt  | 129 |
| ILKAP    | NM_030768    | GAAGAAGCCGUGAACUUCAtt | UGAAGUUCACGGCUUCUUCtg  | 142 |
| IMPA1    | NM_005536    | GCAGAUGCAUUAUUGAAAtt  | UUUCAUAAUUGCAUCUGCtc   | 206 |
| IMPA1    | NM_005536    | GGUUCUUUCUAAUUGGAAtt  | UCCAUAUUAGAAAGAACCat   | 295 |
| IMPA1    | NM_005536    | GGAUAGCUAAAGAAAUUCAtt | UGAAUUUCUUUAGCUAUCtt   | 90  |
| IMPA2    | NM_014214    | GAUUUGCUGUUCGACAAGAtt | UCUUGUCGAACAGCAAUCca   | 126 |
| IMPA2    | NM_014214    | CUGCAGAUCUUGUGACAGAtt | UCUGUCACAAGAUCUGCAGct  | 237 |
| IMPA2    | NM_014214    | CGACGGCACCUGCAAUUUUtt | AAAUUUGCAGGUGCCGUCgat  | 257 |
| IMPAD1   | NM_017813    | GAAAGUACGUCACUACUAtt  | AUAGUAGUGACGUACUUUCga  | 311 |
| IMPAD1   | NM_017813    | GGAUGUGCCUGAUUAGAGUtt | ACUCUUAUCAGGCACAUCca   | 160 |

|           |              |                        |                        |     |
|-----------|--------------|------------------------|------------------------|-----|
| IMPAD1    | NM_017813    | CAGAGGAUCUUCGAAAGUAtt  | UACUUUCGAAGAUCUCUGta   | 107 |
| INPP1     | NM_002194    | GAUUCAACUUAUCAGUAUAtt  | UAUACUGAUAAGUUGAAUCta  | 230 |
| INPP1     | NM_002194    | GAAUCCAAUGAGUUUACUAtt  | UAGUAAACUCAUUGGAUUctt  | 143 |
| INPP1     | NM_002194    | CAGCAGAGCUUCUUAGCAAtt  | UUGCUAAGAAGCUCUGCUGtt  | 220 |
| INPP5A    | XM_001133189 | GAUCUACUCGGAUACCUUAtt  | UAAGGUAUCCGAGUAGAUCtc  | 245 |
| INPP5A    | XM_001133189 | GCCUUUGACUUGGUGAAUAtt  | UAUUCACCAAGUCAAGGCac   | 193 |
| INPP5A    | XM_001133189 | CAGCGAUUCGAGAAGGUUtt   | AAACCUUCUCGAAUCGCUGat  | 192 |
| INPP5B    | NM_005540    | GCGGGAACAUACA AUGUAAtt | UUACAUUGUAUGUUC CCGCaa | 220 |
| INPP5B    | NM_005540    | GUUGAUUACCUGUACCGAAtt  | UUCGGUACAGGUAAUCAACca  | 336 |
| INPP5B    | NM_005540    | GAGUCUUACUGUAAGCAGUtt  | ACUGCUUACAGUAAGACUCtt  | 111 |
| INPP5D    | NM_001017915 | GCGACAUCAUGACGAGUGAtt  | UCACUCGUCAUGAUGUCGctg  | 152 |
| INPP5D    | NM_001017915 | GGAGCGUGAUGAAUCCAGUtt  | ACUGGAUUCAUCACGCUCctg  | 167 |
| INPP5D    | NM_001017915 | GACUGACUCGGGACAAAUAtt  | UAUUUGUCCCGAGUCAGUCtc  | 184 |
| INPP5E    | NM_019892    | GGACUACACCAGGACUGUAtt  | UACAGUCCUGGUGUAGUCCag  | 101 |
| INPP5E    | NM_019892    | GGAUUUCGAAGGAGAUUCAAtt | UGAAUCUCCUUCGAAAUCctg  | 81  |
| INPP5E    | NM_019892    | GACCGCGUCUUGUACAGAAtt  | UUCUGUACAAGACGCGGUCcg  | 141 |
| INPP5F    | NM_014937    | GGAUCGGAUUUACCCAUAAtt  | UUAUGGGUAAAUCCGAUCCca  | 80  |
| INPP5F    | NM_014937    | GAAGGUUGAUGACCGAUUUtt  | AAAUCGGUCAUCAACCUUCtg  | 293 |
| INPP5F    | NM_014937    | GGAAUGCGCUAUAAACGAAtt  | UUCGUUUUAUAGCGCAUUCctg | 114 |
| INPPL1    | NM_001567    | UCACAGAAGUUCACGCUGAtt  | UCAGCGUGAACUUCUGUGAct  | 261 |
| INPPL1    | NM_001567    | CAAUCACUGUGGAAUAUCAAtt | UGAUUAUCCACAGUGAUUGca  | 358 |
| INPPL1    | NM_001567    | GAAGAGCUUUGAGAAUGAUtt  | AUCAUUCUCAAGCUCUUCtt   | 164 |
| ITPA      | NM_033453    | CGUACGCAGAGAUGCCUAAtt  | UUAGGCAUCUCUGCGUACGtc  | 152 |
| ITPA      | NM_033453    | GCUUUCAGCCUGAUGGAUAtt  | UAUCCAUCAGGCUGAAAGCag  | 348 |
| ITPA      | NM_033453    | GCCGGAUGAGAUUUCCAUAAtt | UAUGGAAAUCUCAUCCGGCtc  | 120 |
| KIAA0274  | NM_014845    | GCACGUGACUUUAUGCCUAAtt | UAGGCAUAAAGUCACGUGctg  | 81  |
| KIAA0274  | NM_014845    | GGUUCUUAGAAGGCUAUUAtt  | UAAUAGCCUUCUAAGAACCtg  | 186 |
| KIAA0274  | NM_014845    | GGACGACCAGUGUAUGUCAAtt | UGACAUACACUGGUCGUCCat  | 244 |
| KIAA1274  | NM_014431    | UGAUUCUCUUAACGCGUAAtt  | UACGCGUUGAAGAGAAUCAgg  | 286 |
| KIAA1274  | NM_014431    | GAAGUUAGAAGGUAUCCGAtt  | UCGGAUACCUUCUAACUUCtt  | 265 |
| KIAA1274  | NM_014431    | GAGCGAUACUUCUACCUGAtt  | UCAGGUAGAAGUAUCGCUCca  | 160 |
| LHPP      | NM_022126    | GGAAAACCUUGUCUCAUAtt   | UAUGAGCACAGGUUUUUCcag  | 156 |
| LHPP      | NM_022126    | CCAGCGGUGUGGAAUGAGAtt  | UCUCAUCCACACCGCUGGgc   | 222 |
| LHPP      | NM_022126    | CCUUCUCCUGAGUUUUUCAAtt | UGAAAACUCAGGAGAAGGct   | 270 |
| LOC283871 | NM_001042371 | GAAAGUGACUGCGUGUCUAtt  | UAGACACGCAGUCACUUUCct  | 236 |
| LOC283871 | NM_001042371 | CUGCGUGUCUAAGAAGAAAtt  | UUUCUUCUUAAGACACGCAGtc | 65  |

|           |              |                       |                        |     |
|-----------|--------------|-----------------------|------------------------|-----|
| LOC283871 | NM_001042371 | GUGACUGCGUGUCUAAGAAtt | UUCUUAGACACGCAGUCActt  | 171 |
| LOC389217 | XM_371701    | GGACCGUCCAUAUACUUGAtt | UCAAGUAUAUGGACGGUCCtg  | 141 |
| LOC389217 | XM_371701    | AAUCCAUUUUUAGAUCUUt   | AAGAUCUAAAGAAUGGAUUt   | 142 |
| LOC389217 | XM_371701    | GGUUGUGACAAGCAAGAAAtt | UUUCUUGCUUGUCACAACCca  | 112 |
| LOC441511 | XM_937130    | GGAAAACUAUAGGCUGGAAtt | UCCAGCCUAUAGUUUUCaa    | 163 |
| LOC441511 | XM_937130    | GAACUUCUAUGGGCAUCGAtt | UCGAUGCCCAUAGAAGUUCta  | 164 |
| LOC441511 | XM_937130    | CUGUUUCAUUAACUAUGUAtt | UACAUAGUUAUGAAACAGat   | 133 |
| LOC441868 | XM_497647    | UCACUACAAGAACAUCUUt   | AAGGAUGUUCUUGUAGUGAtt  | 101 |
| LOC441868 | XM_497647    | CAGCUGAAGUGCACCACAtt  | UGGUGGUGCACUUCAGCUGcg  | 190 |
| LOC441868 | XM_497647    | CAAGCCCAAGAAUCACUActt | GUAGUGAUUCUUGGGCUUGtt  | 132 |
| LOC63928  | NM_022097    | CAAACUUCACUAUGCAUUUt  | AAAUGCAUAGUGAAGUUUGtt  | 139 |
| LOC63928  | NM_022097    | GGCUCAUUUUCGCCUGUAtt  | UACAGGGCGAAAAUGAGCCaa  | 147 |
| LOC63928  | NM_022097    | GGAGUUCACCAAGUCCUUAtt | UAAGGACUUGGUGAACUCCac  | 188 |
| LPPR2     | NM_022737    | CUGCGUUGUGCAUAACUUUt  | AAAGUUUAGCACAACGCAGgt  | 125 |
| LPPR2     | NM_022737    | CCAGGGAUUCUUCUGCUAUtt | AUAGCAGAAGAAUCCUGGgt   | 760 |
| LPPR2     | NM_022737    | GGAUUCUUCUGCUAUGACAtt | UGUCAUAGCAGAAGAAUCCct  | 111 |
| LPPR4     | NM_014839    | GGCUAACACGGUAACUCAtt  | UGAGUUAUCCGUGUUAGCCcg  | 174 |
| LPPR4     | NM_014839    | GACCUGCAAUUACGAUUAUt  | AUAAUCGUAAUUGCAGGUCca  | 282 |
| LPPR4     | NM_014839    | GAAGCAACAUUGAUAGCAAtt | UUGCUAUCAAUUGUUGCUUct  | 140 |
| LRGUK     | NM_144648    | CACCAGUGGUCUACACUAUt  | AUAGUGUAGACCACUGGUGag  | 57  |
| LRGUK     | NM_144648    | GAAUAUUGGUUCUUCGUAAtt | UUACGAAGAACCAUAUUCag   | 219 |
| LRGUK     | NM_144648    | GGAUCUUUCAGCGAAUAAAtt | UUUAUUCGCUGAAAGAUCaa   | 243 |
| MFN1      | NM_033540    | GAAUUUUGAUCUCAGUUAUt  | AUAACUGGAGAUCAAUUUCtt  | 143 |
| MFN1      | NM_033540    | CGCAAACUCUGAAUCAACAtt | UGUUGAUUCAGAGUUUGCGac  | 74  |
| MFN1      | NM_033540    | GGCGAUUACUGCAAUCUUUt  | AAAGAUUGCAGUAAUCGCtt   | 106 |
| MFN2      | NM_014874    | CAGCUGGAUUGACAAGUUUt  | AAACUUGUCAAUCCAGCUGtc  | 107 |
| MFN2      | NM_014874    | GUAUUGAUGUCACCACAGAtt | UCUGUGGUGACAUCAAUACca  | 129 |
| MFN2      | NM_014874    | GACUAUAAGCUGCGAAUUAtt | UAAUUCGCAGCUUAUAGUctt  | 282 |
| MINPP1    | NM_004897    | CAUAGAUGAUGCAAAGGUAtt | UACCUUUGCAUCAUCAUGtc   | 126 |
| MINPP1    | NM_004897    | GUUCCGAAGUGGUCUCAUUtt | AAUGAGACCACUUCGGAActt  | 188 |
| MINPP1    | NM_004897    | GGAUUUGGGUAUACUAUUAtt | UAAUAGUAUACCCAUAUCCtc  | 96  |
| MTM1      | NM_000252    | CAUUGAAGGGUUCGAAAUAtt | UAUUUCGAACCCUUCUAAUGct | 156 |
| MTM1      | NM_000252    | GGUACUUUCUUAUUC AACUt | AGUUGAAUAAGAAAGUACCaa  | 70  |
| MTM1      | NM_000252    | CUGUGAAUCUGCUCGAGAAtt | UUCUCGAGCAGAUUCACAGtt  | 204 |
| MTMR1     | NM_003828    | GUUACUACAGGACCAUUAAtt | UUAAUGGUCCUGUAGUAACtg  | 172 |
| MTMR1     | NM_003828    | GCUUAUAGCUGCUACAAUUtt | AAUUGUAGCAGCUUAUAGCtg  | 472 |

|        |              |                        |                         |     |
|--------|--------------|------------------------|-------------------------|-----|
| MTMR1  | NM_003828    | GGAUCACCUUUUAGCUGUtt   | ACAGCUAUAAGGUGAUCCaa    | 264 |
| MTMR10 | NM_017762    | CGAUAAGAUCAAUUCGGAAtt  | UUCCGAAUUGAUCUUAUCGtc   | 219 |
| MTMR10 | NM_017762    | GAAUUGUCAGAUUUCGCUUtt  | AAGCGAAAUCUGACAAUUCtg   | 332 |
| MTMR10 | NM_017762    | GGAUCCCUAUUUUAGGACAtt  | UGUCCUAAAAUAGGGAUCCag   | 187 |
| MTMR11 | NM_181873    | GGGACUGGGAUUUACGUUAtt  | UAACGUAAAUCCCAGUCCcag   | 143 |
| MTMR11 | NM_181873    | CUUCAGGAGUUUUACGGAtt   | UCCGUAAUAACUCCUGAAGat   | 284 |
| MTMR11 | NM_181873    | GCAAUGCACAGAUACUACAtt  | UGUAGUAUCUGUGCAUUGCta   | 126 |
| MTMR12 | NM_001040446 | CCUAAACUGCUUAAACGAUtt  | AUCGUUUUAAAGCAGUUUAGGag | 163 |
| MTMR12 | NM_001040446 | CAGCUAUUUCUGAUAGAUAtt  | UAUCUAUCAGAAAUAGCUGtt   | 214 |
| MTMR12 | NM_001040446 | CCCAAGAACCAUACCGUAAtt  | UUACGGUAUGGUUCUUGGGat   | 141 |
| MTMR14 | NM_001077525 | GUUUCAGCGUGAUUCCAAAtt  | UUUGGAAUCACGCUGAAACag   | 115 |
| MTMR14 | NM_001077525 | GGAUUUAUAAGAUCCGGAUtt  | AUCCCGAUCUUUUAUUCctt    | 292 |
| MTMR14 | NM_001077525 | GCUGGUACACUGUAUCUCAtt  | UGAGAUACAGUGUACCAGCag   | 267 |
| MTMR2  | NM_016156    | GGACAUCGAUUUCAACUAAtt  | UUAGUUGAAAUCGAUGUCCaa   | 176 |
| MTMR2  | NM_016156    | CUCUGACUGUCACGAAUUAtt  | UAAUUCGUGACAGUCAGAtt    | 264 |
| MTMR2  | NM_016156    | GAGAGAAUCAUUACGAAAAtt  | UUUUCGUAAUGAUUCUCUCat   | 188 |
| MTMR3  | NM_153050    | GCUGGACCCUUUUACCGAtt   | UCGGUAAUAAGGGUCCAGCaa   | 159 |
| MTMR3  | NM_153050    | GGAACAUUCCUGUGCAACAtt  | UGUUGCACAGGAAUGUUCcaa   | 200 |
| MTMR3  | NM_153050    | GGAUGGGUUUUUGAUUGAAtt  | UUCAUAUCAAACCCAUCctc    | 133 |
| MTMR4  | NM_004687    | CGUACAUCAGUGACCCUAtt   | UAGGGUCACUGGAUGUACGag   | 121 |
| MTMR4  | NM_004687    | GGAUUUUGGGCACAAGUUUtt  | AAACUUGUGCCCAAAUCCag    | 151 |
| MTMR4  | NM_004687    | GCAACACCUCUGAUCCUGAtt  | UCAGGAUCAGAGGUGUUGCtc   | 109 |
| MTMR6  | NM_004685    | GACCAAAGAAGUACUUAAtt   | UUAAGUACUUCUUUUGGUctt   | 99  |
| MTMR6  | NM_004685    | GACAACUAUCCAAUAUUAtt   | UAAUAUUGGAAUAGUUGUctt   | 222 |
| MTMR6  | NM_004685    | GGAUAUUACACCACCAUAUtt  | AUAUGGUGGUGUAAUAUCCag   | 101 |
| MTMR7  | NM_004686    | GGCAGUUAAUGGAACAAUtt   | AAUUGUCCAUAACUGCCaa     | 129 |
| MTMR7  | NM_004686    | GUCAGUUACAGAUUACCUAtt  | UAGGUAAUCUGUAACUGActg   | 158 |
| MTMR7  | NM_004686    | GCACUAAGGUGAAGAGUAAtt  | UUACUCUUCACCUUAGUGCaa   | 40  |
| MTMR8  | NM_017677    | GGCAAUUAAUGGAACAGUUtt  | AACUGUCCAUAUUAUUGCCag   | 112 |
| MTMR8  | NM_017677    | CCAUAACUGUUGUGAGAUUtt  | AAUCUCACAACAGUUUUGGtg   | 150 |
| MTMR8  | NM_017677    | CCCAGUCCUAGACUGUAUtt   | AUACAGUCUAGGAACUGGGtg   | 155 |
| MTMR9  | NM_015458    | GGCUAAGCUAUGUCAUAUAAtt | UUUUUGACAUAGCUUAGCCctc  | 88  |
| MTMR9  | NM_015458    | GCGAAUUCUAAGUCCAUAUtt  | AAUGGACUUAUGAAUUCGCct   | 404 |
| MTMR9  | NM_015458    | GAAUAGAUCUCUAAGUAUtt   | AUACUUAGAGGAUCUAUUCca   | 201 |
| NAP1L1 | NM_004537    | CUUUUUACGUGAGCGUAUAtt  | UAUACGCUCACGUAAAAAGtg   | 162 |
| NAP1L1 | NM_004537    | GGAACACGAUGAACCUAUUtt  | AAUAGGUUCAUCGUGUUCctg   | 128 |

|        |           |                        |                        |     |
|--------|-----------|------------------------|------------------------|-----|
| NAP1L1 | NM_004537 | GCCUCUAUUUGAUAAAGCGAtt | UCGCUUAUCAAAUAGAGGctg  | 262 |
| NAP1L2 | NM_021963 | CACUCACUCCUUUGAUUAAtt  | UUAUAUCAAGGAGUGAGUGta  | 156 |
| NAP1L2 | NM_021963 | CAAUCCGAACUGUAACUGAtt  | UCAGUUACAGUUCGGAUUGtt  | 242 |
| NAP1L2 | NM_021963 | CAUUUUACGUACUUACAUAAtt | UAUGUAAGUACGUAAAUUgtg  | 180 |
| NAP1L3 | NM_004538 | GGAACAAAUUUCGUGGAUAAtt | UAUCCACGAAAUUUGUUCcCa  | 67  |
| NAP1L3 | NM_004538 | GGCAGAUUUUACAUGAUAAAtt | UUAUCAUGUAAAAUCUGCCca  | 163 |
| NAP1L3 | NM_004538 | GUAGAUACCCUGUUCUUAAtt  | UUAAGAACAGGGUAUCUACct  | 321 |
| NAP1L4 | NM_005969 | CAACAGAU GCGGAAUCGGAtt | UCCGAUUCGCAUCUGUUGgt   | 139 |
| NAP1L4 | NM_005969 | GGUGUACUAUUGACUGGAAtt  | UUCAGUCAAUAGUACACCcg   | 148 |
| NAP1L4 | NM_005969 | CAUCGAAACUUUACCUAAAtt  | UUUAGGUAAAGUUUCGAUGta  | 176 |
| NAP1L5 | NM_153757 | GAAUAUCGAUGGACUUAAtt   | UUUAAGUCCAUCGAUUAUUCtg | 156 |
| NAP1L5 | NM_153757 | AAAGUAUAAUGACAUCUAUtt  | AUAGAUGUCAUUUAUCUUtt   | 210 |
| NAP1L5 | NM_153757 | CUGCAGAAGCGAUGCGAUAtt  | UAUCGCAUCGCUUCUGCAGct  | 310 |
| NT5C2  | NM_012229 | GUAUCGUCGAGAAGCCUAUtt  | AUAGGCUUCUCGACGAUActt  | 77  |
| NT5C2  | NM_012229 | GCGUCAGGUGGAUACUAAAtt  | UUUAGUAUCCACCUGACGCag  | 128 |
| NT5C2  | NM_012229 | GCGUUAUGCUGACCUCUAUtt  | AUAGAGGUCAGCAUAACGCat  | 404 |
| NT5E   | NM_002526 | GUAUCCAUGUGCAUUUUAAAtt | UUAAAAUGCACAUGGAUACgt  | 278 |
| NT5E   | NM_002526 | GAGACAGAGUAGUCAAAUtt   | AAUUUGACUACUCUGUCUCca  | 233 |
| NT5E   | NM_002526 | CGAGUUUGAUGAAAGAGGAtt  | UCCUCUUUCAUCAAACUCGat  | 266 |
| NUDT10 | NM_153183 | CAAAAUUUCUACUCCUAUtt   | AUAGGAGUAAGAAUUUUUGct  | 137 |
| NUDT10 | NM_153183 | GCAUAUAAGAUAUUGCUUAAtt | UAAGCAAUAUCUUAUAUGCta  | 265 |
| NUDT10 | NM_153183 | GCCCAAACAUUGAACCUAAAtt | UUAGGUUCAAUUGUUUGGGCaa | 154 |
| NUDT11 | NM_018159 | CAACUCUAGUGUUUUUGUAAtt | UACAAAACACUAGAGUUUGtt  | 181 |
| NUDT11 | NM_018159 | UGAUGUCUUUGAGAGCAAAtt  | UUUGCUCUCAAGACAUCAta   | 113 |
| NUDT11 | NM_018159 | CUUCUUACAUGUCAUCUUAAtt | UAAGAUGACAUGUAAGAAGtg  | 159 |
| NUDT14 | NM_177533 | GCGUGACCGUUCUCUUAUUtt  | AAUAAGAGAACGGUCACGctg  | 246 |
| NUDT14 | NM_177533 | GCAUGACAGCGUGACCGUtt   | AACGGUCACGCUGUCAUGCgt  | 70  |
| NUDT14 | NM_177533 | UGACCGUUCUCUUAUUAAtt   | UUGAAUAAGAGAACGGUCAcg  | 204 |
| NUDT3  | NM_006703 | GGA AUGUUUAAAUAAGAAAtt | UUCUAUUUUAAAACCAUUCct  | 106 |
| NUDT3  | NM_006703 | GGAAGAUUCAGUUAACAUUtt  | AAUGUUAACUGAAUCUUCcCa  | 174 |
| NUDT3  | NM_006703 | CAGGCAUCAUAUUUUGAAAtt  | UUUCAAAAUAUGAUGCCUGca  | 211 |
| NUDT4  | NM_199040 | CCAAGACCGAAAGCACAGAtt  | UCUGUGCUUUCGGUCUUGGtt  | 133 |
| NUDT4  | NM_199040 | CCAGUGUCAUAAACCUGUAAtt | UACAGGUUUUAUGACACUGGag | 127 |
| NUDT4  | NM_199040 | CAGUCACUGAAAUAUUAGAtt  | UCUAAUAUUUCAGUGACUGtt  | 298 |
| NUDT5  | NM_014142 | GUCAUUUCUUUACCCAAGAtt  | UCUUGGGUAAAGAAAUGActt  | 155 |
| NUDT5  | NM_014142 | GGUCUAUUCUACGCUCUAAtt  | UAGAGCGUAGGAAUAGACCct  | 199 |

|         |              |                        |                        |     |
|---------|--------------|------------------------|------------------------|-----|
| NUDT5   | NM_014142    | GGAUCCUACUGGUAAAACUtt  | AGUUUUACCAGUAGGAUCCat  | 104 |
| NUDT6   | NM_007083    | GAAGAUUUGGAGACACAGtt   | CUGUGUCUCCAUAUUCUtt    | 128 |
| NUDT6   | NM_007083    | GAAAAUACUGGUUGUACAtt   | UGUACAACCAGUAUUUUUct   | 171 |
| NUDT6   | NM_007083    | AGAUCGAAAUAAAUUGAAAtt  | UUUCAUUUAUUUCGAUCUtg   | 134 |
| NUDT8   | NM_181843    | GCUCCACUCCAGGACUGAAtt  | UUCAGUCCUGGAGUGGAGCtg  | 96  |
| NUDT8   | NM_181843    | GCCUGUGUAUGAUCCGCAAtt  | UUGCAGAUCAUACACAGGCcg  | 166 |
| NUDT8   | NM_181843    | CCACUCCGCUACACACUAtt   | UAGUGUGUAGCGGAAGUGGcc  | 102 |
| OCRL    | NM_001587    | GAUUACUUCUUGACUAUCAtt  | UGAUAGUCAAGAAGUAAUCtt  | 131 |
| OCRL    | NM_001587    | GAAAGGAUCAGUGUCGAUAtt  | UAUCGACACUGAUCCUUUCtg  | 274 |
| OCRL    | NM_001587    | CUCCCGCAGUUGAACAUCAAtt | UGAUGUUCAACUGCGGGAGgg  | 155 |
| PAP2D   | NM_001010861 | GAGUAGCAGAAUAUCGAAAtt  | UUUCGAUAUUCUGCUACUCtg  | 211 |
| PAP2D   | NM_001010861 | GGACUGUUUGCUACAGAUAtt  | UAUCUGUAGCAAACAGUCCaa  | 266 |
| PAP2D   | NM_001010861 | GUGUCUAUGCAGCUAUGUAtt  | UACAUAGCUGCAUAGACActg  | 109 |
| PDP2    | NM_020786    | GAUUUUCACUUGCAACUCAtt  | UGAGUUGCAAGUGAAAAUCat  | 55  |
| PDP2    | NM_020786    | UCACUGUGGUGUAUUUUAAAtt | UUAAAAUACACCACAGUGAca  | 286 |
| PDP2    | NM_020786    | CAAGAUUCUUGACCUUGAAtt  | UUCAAGGUCAAGAAUCUUGtg  | 142 |
| PDXP    | NM_020315    | CUCUAUCCCUGAGUACUUAAtt | UAAGUACUCAGGGAUAGAGgg  | 111 |
| PDXP    | NM_020315    | CAGUUUAGGUUCCUAAGUAtt  | UACUUAAGGAACCUAAACUGgt | 100 |
| PDXP    | NM_020315    | GCACGCUUAUGGUGGGUGAtt  | UCACCCACCAUAAGCGUGCgt  | 332 |
| PFKFB1  | NM_002625    | CCAUCUACCUUUGCCGACAtt  | UGUCGGCAAAGGUAGAUGGag  | 373 |
| PFKFB1  | NM_002625    | GCUCGAGGCAAGACCUAUAtt  | UAUAGGUCUUGCCUCGAGCtg  | 70  |
| PFKFB1  | NM_002625    | GGAUAGGAACACCAACUAAtt  | UUAGUUGGUGUCCUAUCCag   | 129 |
| PFKFB2  | NM_001018053 | GCCUCGCACCAUUUACCUUtt  | AAGGUAAAUGGUGCGAGGCtg  | 163 |
| PFKFB2  | NM_001018053 | CGACUCUGAUCGUUAUGAUtt  | AUCAUAACGAUCAGAGUCGgg  | 181 |
| PFKFB2  | NM_001018053 | CCAAGAAACUAACACGCUAtt  | UAGCGUGUUAGUUUCUUGGac  | 381 |
| PFKFB3  | NM_004566    | CCAUCUACCUGAACGUGGAtt  | UCCACGUUCAGGUAGAUGGat  | 184 |
| PFKFB3  | NM_004566    | GAGGAUCAGUUGCUAUGAAtt  | UUCAUAGCAACUGAUCCUCtt  | 161 |
| PFKFB3  | NM_004566    | CCAUAUCAUGGAAGUUAAtt   | UUAACUCCAUGAUUAUUGGag  | 70  |
| PFKFB4  | NM_004567    | UGACCUACGAGGAAAUUCAtt  | UGAAUUUCCUCGUAGGUCAtt  | 30  |
| PFKFB4  | NM_004567    | GUUAUUUACCUCUAUGAACAtt | UGUUCAUGAGGUAAUAUACga  | 79  |
| PFKFB4  | NM_004567    | GGAGAGCGACCAUCUUUAAtt  | UUAAAGAUGGUCGCUCUCCgt  | 175 |
| PHACTR1 | NM_030948    | GAAAGAUCUCAUCCGCUUtt   | AAGCGGAUGAGGAUCUUUctt  | 173 |
| PHACTR1 | NM_030948    | GCUGCAGAAUGAUAGACGAtt  | UCGUCUAUCAUUCUGCAGCcc  | 293 |
| PHACTR1 | NM_030948    | CCAUCCGCAGGAGAAGUAAtt  | UUACUUCUCCUGCGGAUGGgt  | 178 |
| PHACTR2 | NM_014721    | GGCCUAUCUUGUACACCGAtt  | UCGGUGUACAAGAUAGGCCcg  | 193 |
| PHACTR2 | NM_014721    | GAAGGAUCCUGCGAUUUAAAtt | UUAAAUCGCAGGAUCCUUCga  | 119 |

|          |              |                        |                        |     |
|----------|--------------|------------------------|------------------------|-----|
| PHACTR2  | NM_014721    | GGAGGGAUACUCUUGCUAUtt  | AUAGCAAGAGUAUCCCUCcg   | 286 |
| PHACTR3  | NM_183246    | CAUAAAUUCUGAACUCAAAtt  | UUUGAGUUCAGAAUUUAUGat  | 88  |
| PHACTR3  | NM_183246    | GGAUGAUCAGACAGAGCAtt   | UGCUCUGUCUGAUCAUUCctt  | 112 |
| PHACTR3  | NM_183246    | GGCAGCAAUUCGUAAAGAAtt  | UUCUUUACGAAUUGCUGCctt  | 167 |
| PHACTR4  | NM_001048183 | CAGAAGUUUUAGAACGGAAtt  | UCCGUUCUAAAACUUCUGaa   | 166 |
| PHACTR4  | NM_001048183 | GGUCUCUCCCAUCACUAUtt   | AUAGUGAUGGAAGAGACCtg   | 114 |
| PHACTR4  | NM_001048183 | CGCAAUAUAUUGCAACCUAtt  | UAGGUUGCAAUAUAUUGCGtt  | 129 |
| PIB5PA   | NM_001002837 | CUUCCGCAUUGAGAGCUAUtt  | AUAGCUCUCAUUGCGGAAGtt  | 96  |
| PIB5PA   | NM_001002837 | GGUACCAACAAAUACGAUAtt  | UAUCGUUUUUGUUGGUACCca  | 183 |
| PIB5PA   | NM_001002837 | AGUUUGAUGUGGGUACCAAtt  | UUGGUACCCACAUCAAACUtg  | 87  |
| PNKP     | NM_007254    | GGAGGAUCUUGUACCCAGAtt  | UCUGGGUACAAGAUCUCcag   | 144 |
| PNKP     | NM_007254    | GGAAGUCCACCUUUCUCAAtt  | UUGAGAAAGGUGGACUUCcog  | 137 |
| PNKP     | NM_007254    | CGAAGAAGCGUAUGCAGGAAtt | UCCCGCAUACGCUUCUUCGgc  | 189 |
| PPA1     | NM_021129    | GUUUAGAAGGUUAAGGUUtt   | AACCUUAUACCUUCUAAACca  | 97  |
| PPA1     | NM_021129    | GGAUUCAGUUGCAUGAAUAtt  | UAUUCAUGCAACUGAUUCctt  | 142 |
| PPA1     | NM_021129    | CCUGCACAGUACCAACAGAtt  | UCUGUUGGUACUGUGCAGGca  | 111 |
| PPA2     | NM_176867    | GCAGAUUUCUGAUAGCCCUtt  | AGGGCUAUCAGAUUUCUGCac  | 152 |
| PPA2     | NM_176867    | GAUCAUUAGUUGAAUCGGUtt  | ACCGAUUCAACUAAUGAUctt  | 183 |
| PPA2     | NM_176867    | GCAAGAUCAUUAGUUGAAUtt  | AUUCAACUAAUGAUUCUUGctt | 388 |
| PPAP2A   | NM_176895    | CCAGAUUGGUCAAAAUACAtt  | UGAUUUUUGACCAAUCUGGat  | 124 |
| PPAP2A   | NM_176895    | GAUCCAGAUUGGUCAAAAAtt  | UUUUUGACCAAUCUGGAUCac  | 138 |
| PPAP2A   | NM_176895    | CUGCAGCGAUGGUUACAUtt   | AAUGUAACCAUCGCUGCAGtt  | 235 |
| PPAP2B   | NM_177414    | ACUGAAAACUGGUGAGACAtt  | UGUCUCACCAGUUUUCAGUgg  | 114 |
| PPAP2B   | NM_177414    | GGCUACAUUCAGAACUACAtt  | UGUAGUUCUGAAUGUAGCctt  | 177 |
| PPAP2B   | NM_177414    | CACCGAGGGUUUUACUGCAtt  | UGCAGUAAAACCCUCGGUGgt  | 107 |
| PPAP2C   | NM_177526    | ACACCCGCGUGUCUGAUUAtt  | UAAUCAGACACGCGGGUGUag  | 167 |
| PPAP2C   | NM_177526    | GCUCGGACUUCAACAACUAtt  | UAGUUGUUGAAGUCCGAGCga  | 149 |
| PPAP2C   | NM_177526    | CCGCGUGUCUGAUUACAAAtt  | UUUGUAUUCAGACACGCGGgt  | 142 |
| PPAPDC1A | NM_001030059 | GGUGCAAUCAGAUAAACAUAtt | UAUGUUAUCUGAUUGCACCaa  | 173 |
| PPAPDC1A | NM_001030059 | CCUUUGGUGCAAUCAGAUAtt  | UAUCUGAUUGCACCAAAGGat  | 163 |
| PPAPDC1A | NM_001030059 | GCACAAACACUAUUAAAUtt   | AAUUUAAUAGUGUUUGUGCag  | 214 |
| PPAPDC1B | NM_032483    | AGCUUAUUUAUCUACUUAAtt  | UAAGUAAGUAUAAUAAGCUtt  | 193 |
| PPAPDC1B | NM_032483    | CCAAGCCGAUGUUUGUUUAUtt | AUAACAAACAUCGGCUUGGtg  | 424 |
| PPAPDC1B | NM_032483    | CAGUGGACAUUCUCCUUUtt   | AAAGGAAGAAUGUCCACUGgg  | 109 |
| PPAPDC2  | NM_203453    | GCCUGAUGUCGAGGUUCAAtt  | UGAACCUCGACAUCAGGGCgg  | 200 |
| PPAPDC2  | NM_203453    | AGACAUAGGUUUUUCUAGUtt  | ACUAGAAAACCUAUGUCUtg   | 196 |

|         |              |                        |                       |     |
|---------|--------------|------------------------|-----------------------|-----|
| PPAPDC2 | NM_203453    | GAAAGAAACAUGAUGUUCAtt  | UGAACAUCAUGUUUCUUUCtc | 175 |
| PPAPDC3 | NM_032728    | GCUUCUUGC UAAACCUUCUtt | AGAAGGUUUAGCAAGAAGCtt | 100 |
| PPAPDC3 | NM_032728    | UGACAAGCCCUAUAGAAAAtt  | UUUUCUAUAGGGCUUGUCAga | 254 |
| PPAPDC3 | NM_032728    | GGAUGUGCAUUUCAUGUGAtt  | UCACAUGAAAUGCACAUCCaa | 122 |
| PPEF1   | NM_152226    | CCUCAGUUCGAAUCUGGUAtt  | UACCAGAUUCGAACUGAGGga | 125 |
| PPEF1   | NM_152226    | CGUGUAGAGAGGAACAAGAtt  | UCUUGUCCUCUCUACACGgt  | 223 |
| PPEF1   | NM_152226    | GUACAAUCGUUGACAAUGAtt  | UCAUUGUCAACGAUUGUACcg | 106 |
| PPEF2   | NM_006239    | CGCAAGGUUUUAACAAUCUtt  | AGAUUGUUAAUACCUUGCGgt | 105 |
| PPEF2   | NM_006239    | GAAUAUCGACAUUACAGAUtt  | AUCUGUAAUGUCGAUUAUCat | 181 |
| PPEF2   | NM_006239    | CUGGAAACAUUGUAUCGAAtt  | UUCGAUACAAUGUUUCCAGca | 254 |
| PPM1A   | NM_177951    | GACUUGAAGUCACUGAUGAtt  | UCAUCAGUGACUUCAAGUCtg | 170 |
| PPM1A   | NM_177951    | GGAUGUUUUGGGAAAUGAAtt  | UUCAUUUCCCAUAACAUCcca | 109 |
| PPM1A   | NM_177951    | CCAAUAACCAGGAUUUUAAAtt | UUAAAAUCCUGGUUAUUGGtg | 119 |
| PPM1B   | NM_177969    | ACAUGAGUAUUGUACUAGUtt  | ACUAGUACAAUACUCAUGUta | 210 |
| PPM1B   | NM_177969    | AGAUAACAUGAGUAUUGUAtt  | UACAAUACUCAUGUUAUCUcg | 118 |
| PPM1B   | NM_001033556 | GAGAUACAUGAGUAUUGUtt   | ACAUAUCAUGUUAUCUCga   | 196 |
| PPM1D   | NM_003620    | GGGUCUUCCUAGCACAUCAAtt | UGAUGUGCUAGGAAGACCCgt | 166 |
| PPM1D   | NM_003620    | GGAAAGAGAACGAAUCGAAtt  | UUCGAUUCGUUCUCUUUCctt | 197 |
| PPM1D   | NM_003620    | GGACAUUAGAAGAGUCCAAtt  | UUGGACUCUUCUAAUGUCctt | 218 |
| PPM1E   | NM_014906    | GAAUCAUGGAGAGUGCAAAtt  | UUUGCACUCUCCAUGAUUCtc | 94  |
| PPM1E   | NM_014906    | GAGUAGAUGCUGCUAUUUAtt  | UAAAUAGCAGCAUCUACUCcc | 188 |
| PPM1E   | NM_014906    | GAGGCAAAUAGUUGGAAAtt   | UUUCCAACUAUUUUGCCUCca | 205 |
| PPM1F   | NM_014634    | GACCUUUCCGAAUUCAGGAtt  | UCCUGAAUUCGGAAAGGUCtg | 135 |
| PPM1F   | NM_014634    | GGAUGAGAAGGCGCGCAUtt   | AAUGCGCGCCUUCUCAUCctg | 316 |
| PPM1F   | NM_014634    | UGUGAACCGCGCCUACUUtt   | AAAGUAGGCGCGGUUCACAgg | 90  |
| PPM1G   | NM_002707    | CCAUGACUAUUGAAGAGCUtt  | AGCUCUCAAUAGUCAUGGta  | 80  |
| PPM1G   | NM_002707    | AGGCUACCAUGACUAUUGAtt  | UCAAUAGUCAUGGUAGCCUct | 122 |
| PPM1G   | NM_002707    | CUCUGACAGUGGUACAACAtt  | UGUUGUACCACUGUCAGAGcc | 157 |
| PPM1H   | XM_350880    | CAGGGACUUUAAUAUGACAtt  | UGUCAUAUUAAAGUCCCUGta | 133 |
| PPM1H   | XM_350880    | GAGACGACAUUUCUGUAUAtt  | UAUACAGAAAUGUCGUCUCct | 315 |
| PPM1H   | XM_350880    | GCGGAUAUCUAAUGACCGAtt  | UCGGUCAUUAGAUAUCCGCca | 104 |
| PPM1J   | NM_005167    | CCAAUGUCCCGGGAGUUUAtt  | UAAACUCCCGGGACAUUGGaa | 167 |
| PPM1J   | NM_005167    | UGCUGUCCUGGGAACAGAtt   | UCUGUCCCGAGGACUAGCAca | 139 |
| PPM1J   | NM_005167    | GGAUGUCACUACUGACUGUtt  | ACAGUCAGUAGUGACAUCcca | 253 |
| PPM1K   | NM_152542    | CAUUGACCAUACUCCAGAAtt  | UUCUGGAGUAUGGUCAAUGgt | 69  |
| PPM1K   | NM_152542    | GAAUUAACUUCAUGGUGAAtt  | UUCACCAUGAAGUUAAUUCca | 163 |

|          |              |                        |                       |     |
|----------|--------------|------------------------|-----------------------|-----|
| PPM1K    | NM_152542    | GCCCUAUUGCGAGAUGGUAtt  | UACCAUCUCGCAAUAGGGCta | 126 |
| PPM1L    | NM_139245    | ACCGAGAAAUGCUAGAAAAtt  | UUUUCUAGCAUUUCUCGGUca | 161 |
| PPM1L    | NM_139245    | GGACUACGAGAAAGACAAAtt  | UUUGUCUUUCUCGUAGUCctg | 80  |
| PPM1L    | NM_139245    | GAGCAUAGUUUUACAGUCAAtt | UGACUGUAAAACUAUGCUCtt | 194 |
| PPM1M    | NM_144641    | GGGAUGUACUGUCCAACGAtt  | UCGUUGGACAGUACAUCCcag | 167 |
| PPM1M    | NM_144641    | AGAAGGUUUUGUUCAGGGAtt  | UCCCUGAACAAAACCUUCUgt | 268 |
| PPM1M    | NM_144641    | GGUGCGGAGAGAUGAGAUAtt  | UAUCUCAUCUCUCCGCACCaa | 197 |
| PPM2C    | NM_018444    | CAACGAGUUUGGGACUGUUtt  | AACAGUCCCAAACUCGUUGtt | 81  |
| PPM2C    | NM_018444    | CAGUCACGCUGUCUAAUGAtt  | UCAUUAGACAGCGUGACUGct | 209 |
| PPM2C    | NM_018444    | CGCAAGUUGGUGAUCCUAAtt  | UUAGGAUCACCAACUUGCGcc | 118 |
| PPP1CA   | NM_001008709 | CAUCUAUGGUUUUCUACGAUtt | AUCGUAGAAACCAUAGAUGcg | 113 |
| PPP1CA   | NM_001008709 | CGAGAGCAACUACCUCUUtt   | AAAGAGGUAGUUGCUCUCGgg | 172 |
| PPP1CA   | NM_001008709 | CGACCUUCUGCGACUAUUtt   | AAAUAGUCGCAGAAGGUCGta | 80  |
| PPP1CB   | NM_002709    | GAUCUUCUGUUGUCAUGGAtt  | UCCAUGACAACAGAAGAUCtt | 171 |
| PPP1CB   | NM_002709    | GCUAUGGUCUGAUCCAGAUtt  | AUCUGGAUCAGACCAUAGCaa | 142 |
| PPP1CB   | NM_002709    | GAGCUGAUGUAGUCAGUAAtt  | UUACUGACUACAUCAGCUCca | 168 |
| PPP1CC   | NM_002710    | CACCAGAUCUCAAUCUAUtt   | AUAGAUUGAAGAUCUGGUGat | 131 |
| PPP1CC   | NM_002710    | CACAGACUGUUUUAACUGUtt  | ACAGUUAAAACAGUCUGUGaa | 240 |
| PPP1CC   | NM_002710    | CAGCUUCAGGAGAAUGAAAtt  | UUUCAUUCUCCUGAAGCUGga | 57  |
| PPP1R11  | NM_021959    | AGGUAGAAUGGACAAGUGAtt  | UCACUUGUCCAUUCUACCUtt | 116 |
| PPP1R11  | NM_021959    | GAGCCUUACCAUCAACUtt    | AAGUUUGAUGGUAAGGCUCcg | 243 |
| PPP1R11  | NM_021959    | CUGCUGUAUUUAUGAGAAAtt  | UUUCUCAUAAAUACAGCAGca | 151 |
| PPP1R12A | NM_002480    | CAUCAGCUGGUGAUCGAUAtt  | UAUCGAUCACCAGCUGAUGta | 128 |
| PPP1R12A | NM_002480    | CACCUACAUCACCUAUUAAtt  | UUAAUAGGUGAUGUAGGUGtt | 367 |
| PPP1R12A | NM_002480    | GCAGUACCUCAAAUCGUUUtt  | AAACGAUUUGAGGUACUGCtt | 252 |
| PPP1R12B | NM_032104    | GACCAGCCGUGUAGAAGAAtt  | UUCUUCUACACGGCUGGUCag | 61  |
| PPP1R12B | NM_032104    | GCAUCAAUUUCUGGACAAAtt  | UUUGUCCAGAAAUUGAUGCct | 198 |
| PPP1R12B | NM_032104    | GGGAGGUAGUAAUCCUACAtt  | UGUAGGAUUACUACCUCCga  | 115 |
| PPP1R12C | NM_017607    | GAGCAGUCGCGAGAAGAUUtt  | AAUCUUCUCGCGACUCUCag  | 62  |
| PPP1R12C | NM_017607    | ACAUUGAGGUGAUGAGGUUtt  | AACCUCAUCACCUCAAUGUag | 83  |
| PPP1R12C | NM_017607    | GGAGGACCUUCGGAACCAAtt  | UUGGUUCCGAAGGUCCUCctg | 81  |
| PPP1R14A | NM_033256    | GUGGGAAACCUUCGAGGAtt   | UCCUCGACAGGUUUCCCAcat | 122 |
| PPP1R14A | NM_033256    | GCCCGAUGAGAUCAACAUUtt  | AAUGUUGAUCUCAUCGGGCat | 98  |
| PPP1R14A | NM_033256    | CCAGCUUGCUUGUGUAUAAtt  | UUUAUCACAAGCAAGCUGGgc | 156 |
| PPP1R14B | NM_138689    | CUUUAAUAAAGCUAGGAUAtt  | UAUCCUAGCUUUUUAAAGgg  | 104 |
| PPP1R14B | NM_138689    | AGGACCACGCGUCUACUUtt   | AAAGUAGACGCGUGGUCCUgg | 153 |

|          |           |                        |                        |     |
|----------|-----------|------------------------|------------------------|-----|
| PPP1R14B | NM_138689 | UGAUGGGACUUUUUGUGUUtt  | AACACAAAAGUCCCAUCAgt   | 110 |
| PPP1R14C | NM_030949 | GGAUAAAGAGGCAUGAGGAAtt | UUCCUCAUGCCUCUUAUCCga  | 79  |
| PPP1R14C | NM_030949 | AGAGAGAGCUUCAAAAUUAtt  | UAAUUUUGAAGCUCUCUCUtc  | 149 |
| PPP1R14C | NM_030949 | CAGGGAAAAGUGACAGUGAtt  | UCACUGUCACUUUUCCCUGct  | 193 |
| PPP1R14D | NM_017726 | GGACAUUUGCAUACUCCUAtt  | UAGGAGUAUGCAAUUGUCCct  | 70  |
| PPP1R14D | NM_017726 | CCCGGACUCCUCCAAGAUAtt  | UAUCUUGGAGGAGUCCGGGtg  | 143 |
| PPP1R14D | NM_017726 | GGAGGGACAUUUGCAUACUtt  | AGUAUGCAAUUGUCCCUCCtt  | 84  |
| PPP1R16A | NM_032902 | GCAUUGAUGAUUUCGAGAtt   | UCUCGGAAAUCAUCAUUGCag  | 166 |
| PPP1R16A | NM_032902 | GGCUGAAGCAUGCCCAGAAtt  | UUCUGGGCAUGCUUCAGCCgc  | 463 |
| PPP1R16A | NM_032902 | GCAUCUAUACUCCAAGCGAtt  | UCGCUUGGAGUAUAGAUGCcg  | 152 |
| PPP1R16B | NM_015568 | GGACCAACCUGUAUAGGAAtt  | UUCCUAUACAGGUUGGUCCtg  | 185 |
| PPP1R16B | NM_015568 | GCCUGAUUUGUGCAAUGAtt   | UCAUUGCACAAAUCAGGGCtg  | 109 |
| PPP1R16B | NM_015568 | GGACAGACCAAGAGAAUAAtt  | UUAUUCUCUUGGUCUGUCCtg  | 187 |
| PPP1R1A  | NM_006741 | AGAUGAUGGUUGAACAUCAtt  | UGAUGUUCAACCAUCAUCUgg  | 137 |
| PPP1R1A  | NM_006741 | CCACAUCUCAAGUCCACUUt   | AAGUGGACUUGAGAUGUGGgt  | 278 |
| PPP1R1A  | NM_006741 | CGGCAACGGAAGAAGAUGAtt  | UCAUCUUCUUCGUGGCCGtg   | 135 |
| PPP1R1B  | NM_181505 | GCUGAAGUCCUGAAGGUCAtt  | UGACCUUCAGGACUUCAGCct  | 84  |
| PPP1R1B  | NM_181505 | UCAGCAAUUUGAAUGAGAAtt  | UUCUCAUUCAAAUUGCUGAta  | 189 |
| PPP1R1B  | NM_181505 | GGAGCUGGGUUAUCCAAGAtt  | UCUUGGAUAACCCAGCUCcgc  | 199 |
| PPP1R1C  | XM_933439 | GCCGUGCCUGUAUUCAGAtt   | UCUGGAAUACAGGCACGGCaa  | 154 |
| PPP1R1C  | XM_933439 | GGUUUGCAUUCUAACAACAtt  | UGUUGUUAGAAUGCAAACct   | 150 |
| PPP1R1C  | XM_933439 | AGAGUCAGAUUGCACCUGAtt  | UCAGGUGCAAUCUGACUCUgg  | 102 |
| PPP1R2   | NM_006241 | CCAAGCACUCCUACCAUAtt   | UAUGGUAAGGAGUGCUUGGtt  | 131 |
| PPP1R2   | NM_006241 | GGAAAUUAGCUGCAGCUGAtt  | UCAGCUGCAGCUAAUUUCCtg  | 52  |
| PPP1R2   | NM_006241 | CGAAGUUCAUAGACGAGAUtt  | AUCUCGUCUAUGAACUUCGta  | 211 |
| PPP1R3A  | NM_002711 | CAAGGGUAUUUUCGAGUUtt   | AACUCGAAUAAUACCCUUGat  | 220 |
| PPP1R3A  | NM_002711 | GGAUGAUAAUGCUAAUCCAtt  | UGGAUUAGCAUUAUCAUCCag  | 152 |
| PPP1R3A  | NM_002711 | GGCUUGACAUUCUACGUUUtt  | AAACGUAGAAUGUCAAGCCaa  | 164 |
| PPP1R3B  | NM_024607 | GCAUUUGAGAAGACCGUGAtt  | UCACGGUCUUCUCAAUUGCga  | 125 |
| PPP1R3B  | NM_024607 | GGAUUUCGAUGACCCGCUAtt  | UAGCGGGUCAUCGAAUUCcga  | 256 |
| PPP1R3B  | NM_024607 | GCACUGCGAAGGUUCAGAAtt  | UUCUGAACCUUCGCAGUGCct  | 170 |
| PPP1R3C  | NM_005398 | CCACGUCCUUUGACAAGUUtt  | AACUUGUCAAAAGGACGUGGat | 79  |
| PPP1R3C  | NM_005398 | GAAAUCAUGUCUCAUAUAtt   | UAUAUUGAGACAUGAUUUCag  | 190 |
| PPP1R3C  | NM_005398 | CACUUUCGAUUCUUGGAAAtt  | UUUCCAAGAAUCGAAAGUGat  | 194 |
| PPP1R3D  | NM_006242 | GGACAACAACGACCACCGAtt  | UCGGUGGUCGUUGUUGUCCca  | 267 |
| PPP1R3D  | NM_006242 | GUACAUGUUUGAUCAUUAUtt  | AUAUGAUCAAACAUGUACag   | 132 |

|         |              |                        |                        |     |
|---------|--------------|------------------------|------------------------|-----|
| PPP1R3D | NM_006242    | GAAUAUUCUCGAUUUAAUAtt  | UAUUAAAUCGAGAAUUAUCct  | 194 |
| PPP1R3F | NM_033215    | GCUCAUCAAGGACACCGAAtt  | UUCGGUGUCCUUGAUGAGCtc  | 206 |
| PPP1R3F | NM_033215    | CCAGCUCUUUGCACAUGAAtt  | UUCAUGUGCAAAGAGCUGGtg  | 67  |
| PPP1R3F | NM_033215    | AGAUAGAGGUCACCAGUGAtt  | UCACUGGUGACCUCUAUCUgg  | 76  |
| PPP1R7  | NM_002712    | GGAUUUGAGGUACUGAAGAtt  | UCUUCAGUACCUCAAAUCtt   | 96  |
| PPP1R7  | NM_002712    | GAUUGAAGGAUUUGAGGUAtt  | UACCUCAAAUCCUUCAAUCtt  | 139 |
| PPP1R7  | NM_002712    | GCAACUUACAUCAACUACAAtt | UGUAGUUGAUGUAAGUUGCtt  | 110 |
| PPP1R8  | NM_002713    | GAGACAAACUAAUUGAGAAtt  | UUCUCAAUUAGUUUGUCUCct  | 165 |
| PPP1R8  | NM_002713    | GAGAAGAAGUAUUACUUUAtt  | AUAAGUAAUACUUCUUCUCat  | 152 |
| PPP1R8  | NM_002713    | CAAGCGGAUUUCUACCCUUt   | AAGGGUAGAAAUCCGCUUGtt  | 126 |
| PPP2CA  | NM_002715    | CCAAACUAUUGUUAUCGUUt   | AACGAUAACAAUAGUUUGGag  | 195 |
| PPP2CA  | NM_002715    | GCUUGUAGCUCUUAAGGUUt   | AACCUUAAGAGCUACAAGCag  | 128 |
| PPP2CA  | NM_002715    | GAACUUGACGAUACUCUAAtt  | UUAGAGUAUCGUCAAGUUCca  | 115 |
| PPP2CB  | NM_001009552 | GGAUUUUUAUUCAGUGGAGAtt | UCUCCACUGAAUAAUUAUCct  | 196 |
| PPP2CB  | NM_001009552 | CAAUUACUGUUAUCGUUGUt   | ACAACGAUAACAGUAAUUGgg  | 206 |
| PPP2CB  | NM_001009552 | CAUAUUGAGAGGAAAUCAtt   | UGAUUUCUCUCAAUUUGta    | 299 |
| PPP2R1A | NM_014225    | GAACAGCUGGGAACCUUCAtt  | UGAAGGUUCCAGCUGUUCtg   | 64  |
| PPP2R1A | NM_014225    | CUUCGACAGUACUUCCGGAtt  | UCCGGAAGUACUGUCGAAGtt  | 152 |
| PPP2R1A | NM_014225    | GGAGUUCUUUGAUGAGAAAtt  | UUUCUCAUCAAAGAACUCCac  | 164 |
| PPP2R1B | NM_181699    | CGAUCGCGGUUUUAAUCGAtt  | UCGAUUAAAACCGCGAUCGgg  | 251 |
| PPP2R1B | NM_181699    | CCUAAUUACUUGCAUAGAAtt  | UUCUAUGCAAGUAAUUGGat   | 206 |
| PPP2R1B | NM_181699    | GACCAAUUCUAGAUACCAAtt  | UUGGUAUUCUAGAAUUGGUCca | 111 |
| PPP2R2A | NM_002717    | GAGCUAACAGAGGUGAUUAtt  | UAAUCACCUCUGUUAGCUCtt  | 83  |
| PPP2R2A | NM_002717    | GCAUCGCGGAAAACAAUAtt   | UAUUGUUUUCGCGGAUGCtt   | 73  |
| PPP2R2A | NM_002717    | GCCUAGACUUCAAUAAGAAtt  | UUCUUAUUGAAGUCUAGGctg  | 99  |
| PPP2R2B | NM_181674    | CAAGCGUGAUGUGACCCUUt   | AAGGGUCACAUCACGCUUGgt  | 53  |
| PPP2R2B | NM_181674    | CAUCGAGACUUACCAGGUUt   | AACCUGGUAAGUCUCGAUGgg  | 100 |
| PPP2R2B | NM_181674    | GGGACUACUUGACCGUCAAtt  | UUGACGGUCAAGUAGUCCctg  | 149 |
| PPP2R2C | NM_020416    | GGAAGAUUACCGAACGAGAtt  | UCUCGUUCGGUAAUCUUCcat  | 157 |
| PPP2R2C | NM_020416    | GGGACUACCUUACAGUCAAtt  | UUGACUGUAAGGUAGUCCcgg  | 216 |
| PPP2R2C | NM_020416    | GAUACAACCUGAAGGAUGAtt  | UCAUCCUUCAGGUUGUAUCct  | 109 |
| PPP2R2D | NM_001003656 | AGUGCAACGUGUUCGUCUAtt  | UAGACGAACACGUUGCACUgg  | 220 |
| PPP2R2D | NM_001003656 | CCAUAUCCGAUGUAAAAUUt   | AAUUUUACAUCGGAUAUGGat  | 127 |
| PPP2R2D | NM_001003656 | CGUCUACAGCAGUAGCAAAtt  | UUUGCUACUGCUGUAGACGaa  | 122 |
| PPP2R3A | NM_181897    | GAAAGUUGCUGAAUAACCAAtt | UGGUUAUUCAGCAACUUUCct  | 35  |
| PPP2R3A | NM_181897    | GAAGGAUGUUGAGAACGAUtt  | AUCGUUCUCAACAUCUUCctg  | 60  |

|         |           |                       |                        |     |
|---------|-----------|-----------------------|------------------------|-----|
| PPP2R3A | NM_181897 | CGAUCUGUCUCGAUACAAUtt | AUUGUAUCGAGACAGAUCGgc  | 81  |
| PPP2R3B | NM_013239 | CCUCGACCACGAGCAGAAAt  | UUUCUGCUCGUGGUCGAGGta  | 78  |
| PPP2R3B | NM_013239 | GGUCAAGCCGAGGACUGAAAt | UUCAGUCCUCGGCUUGACCag  | 48  |
| PPP2R3B | NM_013239 | CGUUUGUACGGAAUGAUAAAt | UUAUCAUUCGUAACAAACGca  | 206 |
| PPP2R3C | NM_017917 | CGAUGAUCAAUUACGAAAAt  | UUUUCGUAAUUGAUCAUCGct  | 127 |
| PPP2R3C | NM_017917 | CCACCAUUCUAAUCGAUUUtt | AAAUCGAUUAGAAUGGUGGtt  | 206 |
| PPP2R3C | NM_017917 | GGUUUUUGCUGGACAAACAt  | UGUUUGUCCAGCAAAAACCat  | 101 |
| PPP2R4  | NM_178001 | GGAUUCAUCCUUACCCUCAt  | UGAGGGUAAGGAUGAAUCCga  | 64  |
| PPP2R4  | NM_178001 | AGAACUUCAUCAUUCCAAAt  | UUUGGAAUGAUGAAGUUCUga  | 227 |
| PPP2R4  | NM_178001 | GAGUGUAUCCUGUUUAUUAt  | UAAUAAACAGGAUACACUCca  | 136 |
| PPP2R5A | NM_006243 | CGAUGACCUUACUAGCUCAt  | UGAGCUAGUAAGGUCAUCGaa  | 195 |
| PPP2R5A | NM_006243 | GUACUUCUGGAAUAACGAAt  | UUCGUUAAUCCAGAAGUACaa  | 427 |
| PPP2R5A | NM_006243 | GCCUAGCAUUGCAAACGAt   | UCGUUUUGCAAUGCUAGGctg  | 77  |
| PPP2R5B | NM_006244 | CAAACCAUCGUUACACUGAt  | UCAGUGAUACGAUGGUUUgt   | 187 |
| PPP2R5B | NM_006244 | GAACAAUGAGUAUAUCCUAt  | UAGGAUAUACUCAUUGUUCca  | 175 |
| PPP2R5B | NM_006244 | CGCAAACAGUGCAACCACAt  | UGUGGUUGCACUGUUUGCGga  | 85  |
| PPP2R5C | NM_178588 | GGCUUGAGAGCUUACAUCAt  | UGAUGUAAGCUCUCAAGCCta  | 52  |
| PPP2R5C | NM_178588 | GUAAUGUUCUUAACGAAUtt  | AUUCGUUUUAAGAACAUUActt | 137 |
| PPP2R5C | NM_178588 | GGAUUUGCCUUACCACUAAAt | UUAGUGGUAAAGGCAAAUCCat | 85  |
| PPP2R5D | NM_006245 | UCCAUGGACUGAUCUUAAt   | UUUAAGAUCAGUCCAUGGAt   | 212 |
| PPP2R5D | NM_006245 | GCCGUGAUGUUGUCACUGAt  | UCAGUGACAACAUCACGGCta  | 224 |
| PPP2R5D | NM_006245 | UCAUGAGCCUGAUAAAGUGAt | UCACUUAUCAGGCUCAUGAtg  | 170 |
| PPP2R5E | NM_006246 | CACGCUAUCUGAUCUUAAt   | UUUAAGAUCAGAUAGCGUGtc  | 197 |
| PPP2R5E | NM_006246 | GGAGCUAUUUGACAGCGAAAt | UUCGCUGUCAAAUAGCUCcag  | 436 |
| PPP2R5E | NM_006246 | CAGUUUAGGUCUCAAGGCAt  | UGCCUUGAGACCUAACUGtg   | 135 |
| PPP3CA  | NM_000944 | CAUUGAGAAUAAUACAGAt   | UCUGUUAAUUAUCUCAUGca   | 154 |
| PPP3CA  | NM_000944 | CAUCAAUUCUUCGACAGGAt  | UCCUGUCGAAGAAUUGAUGca  | 288 |
| PPP3CA  | NM_000944 | CACUUUAGAUGAUUACAGAt  | UCUGAUUAUCAUCUAAAGUGtt | 155 |
| PPP3CB  | NM_021132 | GGUUUUGGAUAGGAUCAAUtt | AUUGAUCCUAUCCAAACCCtt  | 132 |
| PPP3CB  | NM_021132 | GAGAUUAGAUAGAUUCAAAAt | UUUGAAUCUAUCUAAUCUCct  | 107 |
| PPP3CB  | NM_021132 | GGUGAAAGAAGGUCGAGUAt  | UACUCGACCUUCUUUCACCaa  | 162 |
| PPP3CC  | NM_005605 | GGACAAUUCUUUGACCUAAt  | UUAGGUCAAAGAAUUGUCCat  | 50  |
| PPP3CC  | NM_005605 | GCACUACAGUUCGUAAAGGAt | UCCUUACGAACUGUAGUGctt  | 305 |
| PPP3CC  | NM_005605 | CUAGAUGUCUUAACAUAAt   | UAUUGUUUAUAGACAUCUAGgt | 136 |
| PPP3R1  | NM_000945 | GUACAGCGAGUAUAGAUAt   | UAUCUAUUACUCGCGUUAActa | 200 |
| PPP3R1  | NM_000945 | GVCUAGGAAAGAGAUUUAAAt | UUAAAUCUCUUUCCUAGCCtt  | 170 |

|        |              |                        |                        |     |
|--------|--------------|------------------------|------------------------|-----|
| PPP3R1 | NM_000945    | CAGCAAAUUGUAGACAAAAtt  | UUUUGUCUACAAUUUGCUGta  | 106 |
| PPP3R2 | NM_147180    | GGUUUGCGUUCAGCAUUUAtt  | UAAAUUGCUGAACGCAAACctc | 65  |
| PPP3R2 | NM_147180    | CACCGACGGUGAUGGAGAAtt  | UUCUCCAUCACCGUCGGUGtc  | 130 |
| PPP3R2 | NM_147180    | GCAUUUACGACAUGGAUAAtt  | UUAUCCAUGUCGUAAAUGCtg  | 184 |
| PPP4C  | NM_002720    | UCAAGGCCUGUGCGCUAAtt   | UUAGCGCACAGGGCCUUGAct  | 184 |
| PPP4C  | NM_002720    | GGCACUUAAGGUUCGCUAUtt  | AUAGCGAACCUUAAGUGCCag  | 436 |
| PPP4C  | NM_002720    | GACAAUCGACCGAAAGCAAtt  | UUGCUIUCGGUCGAUUGUCcg  | 121 |
| PPP4R1 | NM_001042388 | GCCGCAUCUGCUAACCUUAtt  | UAAGGUUAGCAGAUGCGGCat  | 256 |
| PPP4R1 | NM_001042388 | GGAUAGGUGUUCUUAACAtt   | UGUUUAAGAACCUCUUCtg    | 97  |
| PPP4R1 | NM_001042388 | GGAGCUCAUUGAACGAUUUtt  | AAAUCGUUCAUUGAGCUCctg  | 161 |
| PPP5C  | NM_006247    | AGAACAACCUUGACUAUAUtt  | AUAUAGUCCAGGUUGUUCUct  | 68  |
| PPP5C  | NM_006247    | CAGAUGUACGAGCUCUUUAtt  | UAAAGAGCUCGUACAUCUGgg  | 179 |
| PPP5C  | NM_006247    | ACAAGAUCGUGAAGCAGAAtt  | UUCUGCUUCACGAUCUUGUtg  | 70  |
| PPP6C  | NM_002721    | CCUAAUUACUGCUAUCGUUtt  | AACGAUAGCAGUAAUUAGGag  | 131 |
| PPP6C  | NM_002721    | CCAUCGAACGGAAUCAGGAtt  | UCCUGAUUCCGUUCGAUGGtt  | 221 |
| PPP6C  | NM_002721    | GCCUGAUCGUAAUACACUUtt  | AAGUGUAAUACGAUCAGGCca  | 87  |
| PPTC7  | NM_139283    | GGACGGUUCGUACCUAGUAtt  | UACUAGGUACGAACCGUCctt  | 215 |
| PPTC7  | NM_139283    | GAAGGACGGUUCGUACCUAtt  | UAGGUACGAACCGUCCUUCtt  | 139 |
| PPTC7  | NM_139283    | GUUUGCAUGUGACAAUGGAtt  | UCCAUUGUCACAUGCAAActg  | 209 |
| PRG2   | XM_001129992 | UCAACUCGGUCAUCUCGGAtt  | UCCGAGAUGACCGAGUUGAag  | 221 |
| PRG2   | NM_024888    | GGCUCAUGAUGGCCGAGAAtt  | UUCUCGGCCAUC AUGAGCCac | 146 |
| PRG2   | NM_024888    | ACGACUCGGUUUAUCAGCAtt  | UGCUGAUAAACCGAGUCGUgg  | 109 |
| PSPH   | NM_004577    | GGAGCGAAAUGUUCAGGUUtt  | AACCUGAACAUUUCGCUCctg  | 106 |
| PSPH   | NM_004577    | CUUUAACGGUGAAUAUGCAtt  | UGCAUAUUCACCGUUAAGGta  | 132 |
| PSPH   | NM_004577    | GGCAACAAGUCAAGGAUAAtt  | UUAUCCUUGACUUGUUGCCtg  | 133 |
| PTEN   | NM_000314    | GCAUACGAUUUUAAAGCGGAtt | UCCGCUUAAAAUCGUAUGCag  | 137 |
| PTEN   | NM_000314    | CACCGCAUAUUAAAACGUAtt  | UACGUUUUAAUAUGCGGUGcc  | 162 |
| PTEN   | NM_000314    | GGUUUUCGAGUCCUAAUUAtt  | UAAUUAGGACUCGAAAACctt  | 135 |
| PTP4A1 | NM_003463    | GAUUGUUGAUGACUGGUUAtt  | UAACCAGUCAUCAACAAUctg  | 116 |
| PTP4A1 | NM_003463    | CAACC AAUGCGACCUUAAAtt | UUUAAGGUCGCAUUGGUUGga  | 182 |
| PTP4A1 | NM_003463    | GUAUGGAGUUACCACAAUAtt  | UAUUGUGGUAACUCCAUActt  | 137 |
| PTP4A2 | NM_080391    | GAACAUGCGUUUUCUGAUAtt  | UAUCAGAAAACGCAUGUUCtc  | 191 |
| PTP4A2 | NM_080391    | CGAUUACGCUUCAGAGAUAtt  | UAUCUCUGAAGCGUAAUCGca  | 136 |
| PTP4A2 | NM_080391    | UGC GUUUUCUGAUAAUCUAtt | UGAGUUUAUCAGAAAACGCAtg | 236 |
| PTP4A3 | NM_007079    | AGAGGCUGCGGUUCAAGAtt   | UCUUUGAACCGCAGCCUCUgt  | 117 |
| PTP4A3 | NM_007079    | GAAGUGACCUAUGACAAAAtt  | UUUUGUCAUAGGUCACUUCac  | 147 |

|         |              |                        |                        |     |
|---------|--------------|------------------------|------------------------|-----|
| PTP4A3  | NM_007079    | CCUUCAUUGAGGACCUGAAtt  | UUCAGGUCCUCAAUGAAGGtg  | 109 |
| PTPDC1  | NM_152422    | GCAUUACAGUCUGAAUUGAtt  | UCAAUUCAGACUGUAAUUCGag | 68  |
| PTPDC1  | NM_152422    | CAACGAGAAUGACUGCUGAtt  | UCAGCAGUCAUUCUCGUUGca  | 290 |
| PTPDC1  | NM_152422    | CACCUUACCUCAAUAUCUAtt  | UAGAUAUUGAGGUAAAGGUGac | 244 |
| PTPN1   | NM_002827    | GUCAGUCCCUUUGACCAUAtt  | UAUGGUCAAAGGGACUGACgt  | 135 |
| PTPN1   | NM_002827    | GGAGAAAGGUUCGUUAAAAtt  | UUUUAACGAACCUUUCUCCat  | 147 |
| PTPN1   | NM_002827    | GGAUUAAACUACAUCAAGAtt  | UCUUGAUGUAGUUUAAUCCga  | 218 |
| PTPN11  | NM_002834    | CGCUCAUAGACUAUACGCUAtt | UAGCGUAUAGUCAUGAGCGgc  | 59  |
| PTPN11  | NM_002834    | CAAUGACGGCAAGUCUAAAtt  | UUUAGACUUGCCGUCAUUGct  | 350 |
| PTPN11  | NM_002834    | CCAUGUUUAGAUUCGCUGUtt  | ACAGCGAAUCAUAACAUGGgt  | 262 |
| PTPN12  | NM_002835    | GGCAAUCCUCAGAUUAUCAtt  | UGAUUUCUGAGGAAUUGCCtt  | 274 |
| PTPN12  | NM_002835    | GCAAUCCUCAGAUUCAAtt    | UUGAUUUCUGAGGAAUUGCct  | 183 |
| PTPN12  | NM_002835    | CGAGUUAAAUUGACAUUAAtt  | UUAAUGUCAAUUUAACUCGgc  | 162 |
| PTPN13  | NM_080684    | CUAGUUCGAUGGAUAAGUAtt  | UACUUAUCCAUCGAACUAGag  | 90  |
| PTPN13  | NM_080684    | GGAUUUUUUACGCUCGAtt    | UCGAGCGUAAAUAACAUCctc  | 355 |
| PTPN13  | NM_080684    | GUAUGGAGAUUAUCAACCAtt  | UGGUUGAUAAUCUCCAUActc  | 176 |
| PTPN14  | NM_005401    | CGAGUAGAGCUGAUACCAAtt  | UUGGUUUCAGCUCUACUCGat  | 134 |
| PTPN14  | NM_005401    | CCACGAAGUUUCGAACGGAtt  | UCCGUUCGAAACUUCGUGgtg  | 98  |
| PTPN14  | NM_005401    | GAAGGGCGAUUACGAUGUAtt  | UACAUCGUAAUCGCCCUUCaa  | 213 |
| PTPN18  | NM_014369    | GGAAGAACCGCUACAAGAtt   | UCUUUGUAGCGGUUCUUCctc  | 129 |
| PTPN18  | NM_014369    | CAAUGACUGUAGCAUUCAAtt  | UUGAAUGCUACAGUCAUUGgg  | 387 |
| PTPN18  | NM_014369    | ACAAAGACGUGCUGCCUUAAtt | UAAGGCAGCACGUCUUUGUag  | 71  |
| PTPN2   | NM_080423    | GGAGAUUCUAGUAUACAGAtt  | UCUGUAUACUAGAAUCUCCct  | 141 |
| PTPN2   | NM_080423    | GUACAGGACUUUCCUCUAAtt  | UUAGAGGAAAGUCCUGUACat  | 125 |
| PTPN2   | NM_080423    | CCUUUGAUCAUUCACCAAAtt  | UUUGGUGAAUGAUCAAAGGca  | 175 |
| PTPN20A | NM_001042390 | GGAUUACAGAGCCCAAUAAtt  | UUUUUGGGCUCUGUAAUCCct  | 202 |
| PTPN20A | NM_001042390 | CCCUUUAGCUAACUAAUAAtt  | UUUUUAGUUAGCUAAAGGGca  | 236 |
| PTPN20A | NM_001042390 | GAUGUUACAUAACGUAUtt    | AAUCGUUUUAUGUAACAUCtg  | 165 |
| PTPN20B | NM_001042365 | CACCCUAAACACUUAACAAtt  | UAUGUUUAGUGUUAGGGUGgg  | 200 |
| PTPN20B | NM_001042365 | GCAUGGUUCAACGAAGGAtt   | UCCUUCGUUUUAACCAUGCca  | 177 |
| PTPN20B | NM_001042365 | AGAUGUUACAUAACGUAUtt   | AUCGUUUUAUGUAACAUCUgt  | 136 |
| PTPN21  | NM_007039    | GCAGUUGCACUAUUAUGGAtt  | UCCAUAUAGUGCAACUGCgg   | 179 |
| PTPN21  | NM_007039    | CAACGAUUAGAACAAGGAAtt  | UUCCUUGUUCUAAUCGUUGtt  | 78  |
| PTPN21  | NM_007039    | GGAUAAAUAUGCAUUGGAAtt  | UCCAUAUGCAUUAUUUAUCCag | 194 |
| PTPN22  | NM_012411    | GGAUGUACGUUGUUACCAAtt  | UUGGUAACAACGUACAUCcca  | 79  |
| PTPN22  | NM_012411    | GUUCAAUAGUGAAACUCGAtt  | UCGAGUUUCACUAUUGAActt  | 251 |

|        |              |                        |                       |     |
|--------|--------------|------------------------|-----------------------|-----|
| PTPN22 | NM_012411    | CUAUGAUUAUAGCCGGGUAtt  | UACCCGGCUAUAUCAUAGgg  | 184 |
| PTPN23 | NM_015466    | AGUUUGUCCUGAAGAAUUAtt  | UAAUUCUUCAGGACAAACUtc | 134 |
| PTPN23 | NM_015466    | GACCAAAAGUGGAACUCCAtt  | UGGAGUUCACUUUUGGUCca  | 154 |
| PTPN23 | NM_015466    | GGAAGAAACUUGUGCAGAUtt  | AUCUGCACAAGUUUCUUCcag | 133 |
| PTPN3  | NM_002829    | CCAGGCUAUCUUUCCGAUAtt  | UAUCGGAAAGAUAGCCUGGat | 127 |
| PTPN3  | NM_002829    | CCUACAUCACGGAAACGGAtt  | UCCGUUUCGUGAUGUAGGtc  | 163 |
| PTPN3  | NM_002829    | CGAUGACUCCUCCGACUUtt   | AAAGUCGGAGGAGUCAUCGgg | 128 |
| PTPN5  | NM_006906    | GAACCGGUACAAAACCAUAtt  | UAUGGUUUUGUACCGGUUctt | 164 |
| PTPN5  | NM_006906    | UGACCUCACCAGACCCUGAtt  | UCAGGGUCUGGUGAGGUCa   | 62  |
| PTPN5  | NM_006906    | CGUCAUGAGCCUCUACGAAtt  | UUCGUAGAGGCUCAUGACGtg | 126 |
| PTPN6  | NM_002831    | CCCAUAUUCGGAUCCAGAAtt  | UUCUGGAUCCGAAUAUGGgtc | 197 |
| PTPN6  | NM_002831    | GAACCGCUACAAGAACAUtt   | AAUGUUCUUGUAGCGGUUctt | 571 |
| PTPN6  | NM_002831    | ACCUCUCCUGACCCUGUAtt   | UACAGGGUCAGGGAGAGGUgg | 271 |
| PTPN7  | NM_080588    | GGACGGAGAUUCAUCAAUtt   | AUUGAUGUAAUCUCCGUCCtc | 199 |
| PTPN7  | NM_080588    | GAACCCAUCUGCUCUGUGAtt  | UCACAGAGCAGAUGGGUUCta | 205 |
| PTPN7  | NM_080588    | GGCUAUGACGGGAAGGAGAtt  | UCUCCUCCCGUCAUAGCCtc  | 139 |
| PTPN9  | NM_002833    | GACUGGUGUUUAUCAUAGAtt  | UCAUAGAUAAACACCAGUCca | 147 |
| PTPN9  | NM_002833    | GGAGAAUACCUAUCGUGAUtt  | AUCACGAUAGGUAUUCUCCaa | 382 |
| PTPN9  | NM_002833    | GAAUCUAUGAGGAAUAUGAtt  | UCAUAUCCUCAUAGAUUCct  | 166 |
| PTPRA  | NM_080841    | CUAUCGUGAUGCUAACAGAtt  | UCUGUUAGCAUCACGAUAGag | 114 |
| PTPRA  | NM_080841    | GCACCAAUUCUAUAGGCAUtt  | AUGCCUAUAGAAUUGGUGctt | 310 |
| PTPRA  | NM_080841    | CCAUCGUCAUGGUUACCAAtt  | UUGGUAACCAUGACGAUGGtg | 73  |
| PTPRC  | NM_002838    | GUUUUGUGACAGGGCAAAtt   | UUUGCCCUGUCACAAAUActt | 79  |
| PTPRC  | NM_002838    | AAGUAUUUGUGACAGGGCAAtt | UGCCCUGUCACAAAUACUuct | 241 |
| PTPRC  | NM_002838    | CAGAAGUAUUUGUGACAGGtt  | CCUGUCACAAAUACUUCUGtg | 167 |
| PTPRD  | NM_001040712 | GAAUAGAUACGCGAAUGUAtt  | UACAUUCGCGUAUCUAUUCtt | 209 |
| PTPRD  | NM_001040712 | GCCUAUCCGUGGAGUAGAAtt  | UUCUACUCCACGGAUAGGctg | 239 |
| PTPRD  | NM_001040712 | GCACGAAUGUUGAGUUCGAtt  | UCGAACUCAACAUUCGUGCct | 329 |
| PTPRE  | NM_130435    | GAGUGAUCCUUCCAUGAAtt   | UUCAUGGAAAGGAUCACUCgg | 109 |
| PTPRE  | NM_130435    | GCGUGGUUUUGGUCGACUAtt  | UAGUCGACCAAACACGcag   | 297 |
| PTPRE  | NM_130435    | CAUCCUUCAUAGACGGCUAtt  | UAGCCGUCUAUGAAGGAUGcg | 170 |
| PTPRF  | NM_130440    | CCGUUACUGUUGCUGCCUAtt  | UAGGCAGCAACAGUAACGGag | 127 |
| PTPRF  | NM_130440    | GACACCCGCUUUACCCUAtt   | UAAGGGUAAAGCGGGUGUCtg | 125 |
| PTPRF  | NM_130440    | GGAGUUCUGAGUACCCAAtt   | UUGGGUACUCAGGAACUCCat | 373 |
| PTPRG  | NM_002841    | GCACCUAUUUGUAAUAGAtt   | UCUAUUACAAUAUAGGUGCct | 129 |
| PTPRG  | NM_002841    | CCGUCACCCUUAUCAGCAAtt  | UUGCUGAUAAAGGGUGACGta | 217 |

|        |           |                        |                         |     |
|--------|-----------|------------------------|-------------------------|-----|
| PTPRG  | NM_002841 | GCCUUUACCGUUCGAGUtt    | ACUCGGAACAGGUAAAGGCta   | 205 |
| PTPRH  | NM_002842 | GGACUACACCUACUGGGUAtt  | UACCCAGUAGGUGUAGUCCtg   | 147 |
| PTPRH  | NM_002842 | CACUCUCAGUUGUACGUAtt   | AUACGUACAACUGAGAGUGgg   | 165 |
| PTPRH  | NM_002842 | GACUGAGGCUCAGUACGUAtt  | UACGUACUGAGCCUCAGUCtg   | 103 |
| PTPRJ  | NM_002843 | CAAGGACCUUUACCGAACAtt  | UGUUCGGUAAAAGGUCCUUGtg  | 211 |
| PTPRJ  | NM_002843 | CACUGAGUAUAGAACGGAAtt  | UUCCGUUCUAUACUCAGUGcc   | 336 |
| PTPRJ  | NM_002843 | GCACGU AUGACAAAGCGAUtt | AUCGCUUUGUCAUACGUGCtt   | 149 |
| PTPRK  | NM_002844 | CAGCUAUAGCAGUAUAAGAtt  | UCUUAUACUGCUAUAGCUGat   | 152 |
| PTPRK  | NM_002844 | CCAGUAGCCCAGACUAAGAtt  | UCUUAGUCUGGGCUACUGGta   | 100 |
| PTPRK  | NM_002844 | GCCUUAAGAUCUCGGCGUAtt  | UACGCCGAGAUCUUAAGGCtt   | 225 |
| PTPRM  | NM_002845 | GCAUCGAUUUUCACUAUUUtt  | AAUAGUGAAAAUCGAUGCag    | 98  |
| PTPRM  | NM_002845 | GCCUAAUUCUAUUACCCAtt   | UGGGUAAUAGGAAUAGGCac    | 237 |
| PTPRM  | NM_002845 | GGAUAUCAUUGCAUACGAtt   | UCGU AUGCAAUGAUAUUCCcg  | 111 |
| PTPRN  | NM_002846 | UCAUCGACAUGGUCCUGAAtt  | UUCAGGACCAUGUCGAUGAgg   | 117 |
| PTPRN  | NM_002846 | GCAUAAAACUGAAGGUGGAtt  | UCCACCUUCAGUUUUUAGCgg   | 355 |
| PTPRN  | NM_002846 | ACAUCGUCACUGAUCAGAAtt  | UUCUGAUCAGUGACGAUGUag   | 75  |
| PTPRN2 | NM_130843 | GACUUCGCGAGAAAAGUAAtt  | UUACUUUUCUGCGGAAGUCca   | 133 |
| PTPRN2 | NM_130843 | GGUCGAAAAGCAAACUCAAtt  | UUGAGUUUGCUUUUCGACCcg   | 162 |
| PTPRN2 | NM_130843 | GCAGUGACCUUCAAGUGAtt   | UCACUUUGAAGGUCACUGCtg   | 62  |
| PTPRO  | NM_002848 | GGAAGAACCUAUAGCCUAUtt  | AUAGGCUAUAGGUUCUUCcgt   | 129 |
| PTPRO  | NM_002848 | GAAUCGAUGUAAAAACCGUtt  | ACGGUUUUUACAUCGAUUCag   | 280 |
| PTPRO  | NM_002848 | CAUUCGGGAUCAUGAGUUUtt  | AAACUCAUGAUCCCGAAUGtg   | 318 |
| PTPRR  | NM_130846 | CACCUACA UUAUAGCUAAUtt | AUUAGCAUUAUUGUAGGUGct   | 99  |
| PTPRR  | NM_130846 | CAUUCGAAACCUUGUCUUAtt  | UAAGACAAGGUUUCGAAUGgt   | 275 |
| PTPRR  | NM_130846 | GGGUCCAACGU AUCUCUUAtt | UAAGAGAUACGUUGGACCCtc   | 158 |
| PTPRS  | NM_130853 | GCAAUGGACGCAUCAAAACAtt | UGUUUGAUGCGUCCA UUGCtg  | 94  |
| PTPRS  | NM_130853 | GGAUCAAGUGUGAUCAGUAtt  | UACUGAUCACACUUGAUCCgt   | 125 |
| PTPRS  | NM_130853 | CCUAUUACGUCAUCGAAUAtt  | UAUUCGAUGACGUAAUAGGac   | 208 |
| PTPRT  | NM_007050 | GCCUCGAUUCUCUACACUAtt  | UAGUGUAGAGAAUCGAGGCtg   | 124 |
| PTPRT  | NM_007050 | GCUUAUUCCUACUCCUAUUtt  | AAUAGGAGUAGGAAUAAGCat   | 89  |
| PTPRT  | NM_007050 | CCGCAAUAAGAAUCGAUAtt   | AUAUCGAUUCUUAUUGCGGtt   | 235 |
| PTPRU  | NM_005704 | GCAUUGAUCCUCAGAGUAAtt  | UUACUCUGAGGAUCAAUUCGgg  | 91  |
| PTPRU  | NM_005704 | GCAUCGUCAUGAUCACCAAtt  | UUGGUGAUC AUCGACGAUGCtg | 222 |
| PTPRU  | NM_005704 | GGCUCCUACUUGAUGGUCAtt  | UGACCAUCAAGUAGGAGCCgt   | 63  |
| PTPRZ1 | NM_002851 | GGAUGAU AUGGGACCAUAAtt | UUAUGGUCCAU AUCAUCCtc   | 104 |
| PTPRZ1 | NM_002851 | GCUUAUACA UCCGAUGAAtt  | UUCAUCGGAUGUAUAAGCtt    | 126 |

|             |           |                        |                        |     |
|-------------|-----------|------------------------|------------------------|-----|
| PTPRZ1      | NM_002851 | GCGACCAACUGAUUGUCGAtt  | UCGACAAUCAGUUGGUCGctg  | 232 |
| RNGTT       | NM_003800 | GCAGUGUAUAGAACGAGAAtt  | UUCUCGUUCUAUACACUGCag  | 131 |
| RNGTT       | NM_003800 | GAUUGAUAGAGACAAUUCAtt  | UGAAUUGUCUCUAUCAUUCat  | 250 |
| RNGTT       | NM_003800 | GGAACUUUUUCGUCGGUAUtt  | AUACCGACGAAAAAGUUCctt  | 207 |
| RP11-35N6.1 | NM_207299 | CAAGCACAAUCAAGACGAAtt  | UUCGUCUUGAUUGUGCUUGta  | 94  |
| RP11-35N6.1 | NM_207299 | GGGUCUCUGAGUAUCGGAAtt  | UUCCGAUACUCAGAGACCCgg  | 313 |
| RP11-35N6.1 | NM_207299 | GGAUCUCCUCCAAACCCAtt   | UGGGUUUGGAAGGAGAUCCtt  | 96  |
| RWDD2       | NM_033411 | GGAUGACUAUCACAUGAAtt   | UUCAUGUGAUAGUCAUUCctt  | 62  |
| RWDD2       | NM_033411 | GAUCUACAGUCACCAUAUAtt  | UAUAUGGUGACUGUAGAUCCa  | 146 |
| RWDD2       | NM_033411 | GGCUCAUGGUGACUAUGGAtt  | UCCAUAUGUCACCAUGAGCCtc | 181 |
| SACM1L      | NM_014016 | GGAACUCAUUGAUACGAUAtt  | UAUCGUAUCAUUGAGUUCcag  | 175 |
| SACM1L      | NM_014016 | GAUCAGCGGUUUGUAUGGAtt  | UCCAUACAAACCGCUGAUctg  | 282 |
| SACM1L      | NM_014016 | GCAAGAUGAAUUAAGUUAUtt  | AUAACUUAUUUCAUCUUGCat  | 103 |
| SAPS1       | NM_014931 | GCAAGGUCGUAACCGCAAtt   | UUGC GGUUGACGACCUUGCac | 107 |
| SAPS1       | NM_014931 | GAGCAGCUCUUAAGCAACAtt  | UGUUGCUUAAGAGCUGCUCaa  | 96  |
| SAPS1       | NM_014931 | GCAUCCUCAUCAACCGCAAtt  | UUGC GGUUGAUGAGGAUGCcc | 145 |
| SAPS2       | NM_014678 | CAAUCUCAUUGCAAGAAAAtt  | UUUUCUUGCAAUGAGAUUGcc  | 168 |
| SAPS2       | NM_014678 | GACUUGUUCUUAAGUACAtt   | UGUACUUAAGAACAAGUCca   | 354 |
| SAPS2       | NM_014678 | ACAUCUUGCAGGAGUGUAAtt  | UUACACUCCUGCAAGAUGUca  | 232 |
| SAPS3       | NM_018312 | GGUUACAUGGGACACCUAAtt  | UUAGGUGUCCCAUGUAACCat  | 135 |
| SAPS3       | NM_018312 | GAUGAAUCCUUGC UAAUGAtt | UCAUUAGCAAGGAUUCAUctt  | 196 |
| SAPS3       | NM_018312 | GAUUAUCAGAUGCAACAAAtt  | UUUGUUGCAUCUGAUAAUCag  | 86  |
| SBF1        | NM_002972 | CUAAGACUGUGGACGAGAAtt  | UUCUCGUCCACAGUCUUGgg   | 136 |
| SBF1        | NM_002972 | ACACGGAGGUGUUCAGGAAtt  | UUCUGAACACCUCCGUGUgg   | 499 |
| SBF1        | NM_002972 | GCACUGCUGUUCCUCUCAAtt  | UGAGAGGAAACAGCAGUGCca  | 177 |
| SBF2        | NM_030962 | GAUGAUGAAUUGUACUCUAtt  | UAGAGUACAAUUCAUCAUctt  | 117 |
| SBF2        | NM_030962 | GCACUAUUAAA UJCCCGAtt  | UCGGGAAUUUUAAUAGUGCct  | 436 |
| SBF2        | NM_030962 | GGACUGGGAU GAUACACCUtt | AGGUGUAUCAUCCAGUCctt   | 284 |
| SET         | NM_003011 | GAGUCAAACGCAGAAUAAAtt  | UUUAUUCUGCGUUUGACUCga  | 74  |
| SET         | NM_003011 | UGGAAAGGAUUUGACGAAAtt  | UUUCGUCAAAUCUUUCCAga   | 194 |
| SET         | NM_003011 | CGAAGUCCACCGAAAUCAAtt  | UUGAUUUCGGUGGACUUCGaa  | 152 |
| SGPP1       | NM_030791 | GUGUGAUGAUUUCGAAAAtt   | UUUUCGAAUAUCAUCACACgg  | 184 |
| SGPP1       | NM_030791 | GGAUGGUAAUUUGUACUAAUtt | AUUAGUACAAAUACCAUCCct  | 199 |
| SGPP1       | NM_030791 | GCUGGAUUCCUAUUAUACCAtt | UGGUAAUAUAGGAAUCCAGCaa | 217 |
| SGPP2       | NM_152386 | GAAUAUUGACCCUUAUUUAtt  | UAAUAAGGGUCAAUAUUCca   | 145 |
| SGPP2       | NM_152386 | CGCUGAAUCUCUCCUGUUtt   | AACAGGGAGAGAUUCAGCGgg  | 272 |

|        |           |                        |                        |     |
|--------|-----------|------------------------|------------------------|-----|
| SGPP2  | NM_152386 | GUAUUUACUCAUGGUUCAtt   | UGAACCAUGAGUAUAAUActt  | 150 |
| SKIP   | NM_130766 | CCUCAAUUCUUGACAUUAUUt  | AUAUAUGUCAAGAUUGAGGtt  | 123 |
| SKIP   | NM_130766 | CAAUAUCCCUACCACUGAAtt  | UUCAGUGGUAGGGAUUUGct   | 170 |
| SKIP   | NM_130766 | GAACCUCAAUUCUUGACAUAtt | UAUGUCAAGAUUGAGGUUCcg  | 123 |
| SSH1   | NM_018984 | CCUCCACAGUCAUAGCCUAtt  | UAGGCUAUGACUGUGGAGGcc  | 192 |
| SSH1   | NM_018984 | GGCUUAUUUGCAUAUCAUAtt  | UAUGAUUUGCAAUAAGCCag   | 276 |
| SSH1   | NM_018984 | GCAUGGAGGAUGAUGCUAUtt  | AUAGCAUCAUCCUCCAUGCcg  | 168 |
| SSH2   | NM_033389 | GGACUUGAAUUGACUAGUUtt  | AACUAGUCAAUUCAAGUCctg  | 49  |
| SSH2   | NM_033389 | GUAUCAUAACAUCGGGUAtt   | UACCCGAAUGUUUAUGAUActc | 320 |
| SSH2   | NM_033389 | GGAGCGACACGCUAAUUCAtt  | UGAAUUAGCGUGUCGCUCcag  | 178 |
| SSH3   | NM_017857 | AGACUGAACUCCGAACAGAtt  | UCUGUUCGGAGUUCAGUCUct  | 72  |
| SSH3   | NM_017857 | CCACGAGUCUUCACAUGAAtt  | UUCAUGUGAAGACUCGUGGga  | 50  |
| SSH3   | NM_017857 | GCACCUCAGAGACCAGUGAtt  | UCACUGGUCUCUGAGGUGctc  | 145 |
| STYXL1 | NM_016086 | CCCUUCGAGUGAAGAAGAAtt  | UUCUUCUUCACUCGAAGGGca  | 87  |
| STYXL1 | NM_016086 | GUCACUUCAUUGAAAUUCAtt  | UGAAUUUCAUGAAGUGACac   | 107 |
| STYXL1 | NM_016086 | ACAAAACUCUCCAGAUUAAtt  | UUAUCUGGAGAGUUUUGUgg   | 130 |
| SYNJ1  | NM_203446 | GACUGGUUAUUACGUCUUAtt  | UAAGACGUAAUAACCAGUCat  | 97  |
| SYNJ1  | NM_203446 | GCCUAAGAAAUAUCGAGUAtt  | UACUCGAAUUUUCUUAAGCtt  | 197 |
| SYNJ1  | NM_203446 | GAGUGGUACAGUUCGAACAtt  | UGUUCGAACUGUACCACUCtg  | 171 |
| SYNJ2  | NM_003898 | CAGUGAAGAUUAGACCGAAtt  | UUCGGUCUAAUCUUCACUGct  | 113 |
| SYNJ2  | NM_003898 | CCUUCAAUACCGACCUUAtt   | UAAGGUCGGUGAUUGAAGGtt  | 170 |
| SYNJ2  | NM_003898 | CGUACAAAGAUGACGCGGAtt  | UCCGCGUCAUCUUUGUACGtt  | 275 |
| TNS1   | NM_022648 | GUUCCGCUCUCAAUCCUUUt   | AAAGGAUUUGAGAGCGGAACat | 110 |
| TNS1   | NM_022648 | CCAGGACACUUCUAAGUAUtt  | AUACUUAGAAGUGUCCUGGac  | 333 |
| TNS1   | NM_022648 | CCAUCAUGCAGCAGAAUAAtt  | UUAAUUCUGCUGCAUGAUGGtt | 171 |
| TNS3   | NM_022748 | GCUCAUUCAUUGUUCGAGAtt  | UCUCGAACAAUGAAUGAGCcc  | 173 |
| TNS3   | NM_022748 | CUUACGAAGCUUAACCCAAtt  | UUGGGUUAAGCUUCGUAAGgt  | 179 |
| TNS3   | NM_022748 | GGAUCUGCAUCGUCAUCGAtt  | UCGAUGACGAUGCAGAUCctg  | 286 |
| TPTE   | NM_199260 | CGUUAUGUACGUGAUCUAAtt  | UUAGAUCACGUACAUAACGag  | 103 |
| TPTE   | NM_199260 | GAAAUAUGUUCGGUACUUGAtt | UCAAGUACCGAACAUUUUCct  | 357 |
| TPTE   | NM_199260 | AGAAGAGAUUUGUUGCAUAtt  | UAUGCAACAUAUCUCUUCUga  | 183 |
| TPTE2  | NM_130785 | CGAUUUUGCAUGACAUUGAtt  | UCAUGUCAUGCAAUAUCGaa   | 82  |
| TPTE2  | NM_130785 | GAAUAGAUUUGUUGGAUUt    | AUAUCCAACAUAUCUAUUCtg  | 165 |
| TPTE2  | NM_130785 | GAGGAAAGCCUAUAUUUAUtt  | AAUAAUAUAGGCUUCCUCgg   | 193 |
