# Supplementary material for: Automated High-Throughput RNAi Screening in Human Cells Combined with Reporter mRNA Transfection to Identify Novel Regulators of Translation
Source: PubMed Central journal article supplement (PMC3459937; doi:10.1371/journal.pone.0045943), 2012-09-27
Supplement: pone.0045943.s005.pdf [file pone.0045943.s005.pdf]

### Supplementary Table 3

| Gene Symbol | RefSeq       | Sense siRNA Sequence 5'-3'                                              | Antisense siRNA Sequence 5'-3'                                          |
|-------------|--------------|-------------------------------------------------------------------------|-------------------------------------------------------------------------|
| ALPK2       | NM_052947    | CAUCGGCCUGAGAACAAUAtt<br>CCAUGACCUUCAUUGAUCAtt<br>GGGCUGUACCUGAUAGUCUtt | UAUUGUUCUCAGGCCGAUGga<br>UGAUCAAUGAAGGUCAUGGaa<br>AGACUAUCAGGUACAGCCCag |
| DCLK3       | XM_940612    | GAAUGACCGUGUGAGGAAAtt<br>CCACUGACACUGAAGAGCAtt<br>GACGAGCUCUUUAACAUCAtt | UUUCCUCACACGGUCAUUCtt<br>UGCUCUUCAGUGUCAGUGGtt<br>UGAUGUUAAAGAGCUCGUCct |
| MAPK3       | NM_001040056 | GGAUCAGCUC AACCAUUt<br>GGACCGGAUGUUAACCUUUt<br>GACCUGAAUUGUAUCAUCAtt    | AAUGUGGUUGAGCUGAUCCag<br>AAAGGUUAACAUCGGUCCag<br>UGAUGAUACAAUUCAGGUCct  |
