# Supplementary material for: Automated High-Throughput RNAi Screening in Human Cells Combined with Reporter mRNA Transfection to Identify Novel Regulators of Translation
Source: PubMed Central journal article supplement (PMC3459937; doi:10.1371/journal.pone.0045943), 2012-09-27
Supplement: pone.0045943.s006.pdf [file pone.0045943.s006.pdf]

## Supplementary Table 4

| <b>Control</b> | <b>Sense siRNA Sequence 5'-3'</b> | <b>Antisense siRNA Sequence 5'-3'</b> |
|----------------|-----------------------------------|---------------------------------------|
| Scrambled      | UUCUCCGAACGUGUCACGUTT             | ACGUGACACGUUCGGAGAATT                 |
| Firefly        | CGGAUUACCAGGGAAUUCATT             | UGAAAUCCCUGGUAUCCGTT                  |
| PLK1           | CAACCAAAGUCGAAUAUGATT             | UCAUAUUCGACUUUGGUUGCC                 |
