# Supplementary material for: Automated High-Throughput RNAi Screening in Human Cells Combined with Reporter mRNA Transfection to Identify Novel Regulators of Translation
Source: PubMed Central journal article supplement (PMC3459937; doi:10.1371/journal.pone.0045943), 2012-09-27
Supplement: pone.0045943.s007.pdf [file pone.0045943.s007.pdf]

**Supplementary Table 5**

| <b>Control</b> | <b>Forward primer</b>  | <b>Reverse primer</b>  |
|----------------|------------------------|------------------------|
| VEGF           | CGAAACCATGAACTTTCTGC   | CCTCAGTGGGCACACACTCC   |
| MAPK3          | GCAGGACCTGATGGAGACTGAC | CCAGAATGCAGCCCACAGAC   |
| ACTIN $\beta$  | TTCCGCTGCCCTGAGGCACTCT | TCTGCTGGAAGGTGGACAGCGA |
